**Title:** Neural signatures of auditory hypersensitivity following acoustic trauma

**Authors:** Matthew McGill<sup>1-2+</sup>, Ariel E. Hight<sup>1-2\*</sup>, Yurika L. Watanabe<sup>1</sup>, Aravindakshan Parthasarathy<sup>1,3^</sup>, Dongqin Cai<sup>1,3</sup>, Kameron Clayton<sup>1,3</sup>, Ken Hancock<sup>1,3</sup>, Anne Takesian<sup>1,3</sup>, Sharon G. Kujawa<sup>1,3</sup>, and Daniel B. Polley<sup>1,3</sup>

1- Eaton-Peabody Laboratories, Massachusetts Eye and Ear Infirmary, Boston MA 02114 USA

2- Division of Medical Sciences, Harvard Medical School, Boston MA 02114

3- Dept. Otolaryngology - Head and Neck Surgery, Harvard Medical School, Boston MA 02114 USA

\* Present address: Department of Otolaryngology-Head and Neck Surgery, New York University School of Medicine, New York, New York 10016 USA

^ Present address: Department of Communication Science and Disorders, University of Pittsburgh, Pittsburgh PA 15260 USA

+ Lead contact: [mmcgill@harvard.edu](mailto:mmcgill@harvard.edu)

**Keywords:** homeostatic plasticity, compensatory plasticity, two-photon calcium imaging, excess central gain, hearing loss, loudness recruitment, hyperacusis, tinnitus

1 **ABSTRACT**

2 Throughout the brain, neurons exhibit a remarkable capacity to maintain stable firing rates despite  
3 large perturbations in afferent activity levels. As an exception, homeostatic regulation of neural  
4 activity often fails in the adult auditory system after hearing loss. Cochlear deafferentation caused  
5 by aging or noise exposure triggers widespread neural hyperactivity, particularly in the auditory  
6 cortex (ACtx), which underlies perceptual disorders including tinnitus and hyperacusis. Here, we  
7 show that mice with noise-induced damage of the high-frequency cochlear base were behaviorally  
8 hypersensitive to spared mid-frequency tones and to direct optogenetic stimulation of auditory  
9 thalamocortical neurons. Chronic 2-photon calcium imaging from ACtx pyramidal neurons (PyrNs)  
10 revealed an initial stage of diffuse hyperactivity, hypercorrelation, and hyperresponsivity that  
11 consolidated around deafferented map regions three or more days after acoustic trauma.  
12 Deafferented PyrN ensembles displayed hypersensitive decoding of spared mid-frequency tones,  
13 mirroring behavioral hypersensitivity. At the level of individual PyrNs, some exhibited stable,  
14 homeostatic gain control after acoustic trauma, while others showed non-homeostatic excess gain.  
15 Interestingly, factors such as baseline spontaneous activity levels and sound level encoding could  
16 account for 40% of the variability in PyrN gain regulation after acoustic trauma. These findings  
17 suggest that non-homeostatic regulation of cortical sound intensity coding following sensorineural  
18 loss may underlie the well-established clinical phenomenon of loudness hypersensitivity. Further,  
19 while cortical gain changes are triggered by reduced bottom-up afferent input, their subsequent  
20 stabilization is also shaped by their local circuit milieu, where baseline response features can  
21 identify neurons with the greatest propensity for developing pathological hyperactivity following  
22 sensorineural hearing loss.

23  
24  
25  
26  
27  
28  
29  
30  
31  
32  
33

## 34 INTRODUCTION

35           Sensory disorder research typically focuses on the mechanisms underlying inherited or acquired  
36 forms of sensory loss. But one of the most common and debilitating sensory disorder phenotypes reflect just  
37 the opposite problem; not what cannot be perceived, but what cannot *stop* being perceived. Sensory  
38 overload typically presents as three co-morbid and inter-related features: *i)* an irrepressible perception of  
39 phantom stimuli that have no physical environmental source, *ii)* a selective inability to perceptually suppress  
40 distracting sensory features, and *iii)* the perception that moderate stimuli are uncomfortably intense,  
41 distressing, or even painful. One or more of these phenotypes are commonly observed in heterogeneous  
42 neurological and psychiatric disorders including autism spectrum disorder (Klintwall et al., 2011; Robertson  
43 and Baron-Cohen, 2017), post-traumatic stress disorder (Ehlers and Clark, 2000; Garfinkel and Liberzon,  
44 2009), fibromyalgia (Nielsen and Henriksson, 2007; Yunus, 2007), schizophrenia (González-Rodríguez et  
45 al., 2021; Luck and Gold, 2008), traumatic brain injury (Nampiaparampil, 2008), sensorineural hearing loss  
46 (Auerbach et al., 2014; Hebert et al., 2013; Pienkowski et al., 2014a), attention deficit hyperactivity disorder  
47 (Ghanizadeh, 2011), migraine (Goadsby et al., 2017), and also as a consequence of normal aging  
48 (Herrmann and Butler, 2021a; Nusbaum, 1999).

49           Although overload phenotypes are reported across sensory modalities, they are most common and  
50 debilitating in hearing, where an estimated 14% of adult population continuously perceives a phantom  
51 ringing or buzzing sound (i.e., tinnitus) (Shargorodsky et al., 2010), 9% of adults report hypersensitivity to  
52 ordinary environmental sounds (i.e., hyperacusis, or loudness hypersensitivity) (Pienkowski et al., 2014a,  
53 2014b), and 9% of adults seek health care for poor hearing in complex listening environments but do not  
54 have hearing loss (Parthasarathy et al., 2020a). Although one or more of these auditory overload  
55 phenotypes can occur without evidence of cochlear dysfunction, they are far more common in persons with  
56 sensorineural hearing loss (SNHL) arising from age- or noise-induced degeneration of cochlear hair cells  
57 and cochlear afferent nerve terminals (for review see Auerbach and Gritton, 2022; Herrmann and Butler,  
58 2021b; Noreña, 2011; Zeng, 2013).

59           Phantom percepts, hypersensitivity, and poor distractor suppression are thought to arise from  
60 abnormal elevations and patterning of neural activity in central sensory pathways. In the auditory system,  
61 sensorineural damage in the cochlea reduces the volume of electrical activity reaching the brainstem from  
62 the auditory nerve. Afferent loss is registered by central auditory neurons via decreased cytosolic calcium  
63 levels, which triggers a cascade of genetic, epigenetic, post-transcriptional, and post-translational  
64 processes that collectively adjust the electrical excitability of neurons to restore activity back to the baseline  
65 set point (for review see Harris and Rubel, 2006; Turrigiano, 2012). These changes can be grouped into  
66 three categories: 1) synaptic sensitization via upregulation of receptors for excitatory neurotransmitters  
67 (e.g., AMPA receptor scaling) (Balaram et al., 2019; Kotak et al., 2005; Sturm et al., 2017; Teichert et al.,  
68 2017; Sungchil Yang et al., 2011); 2) synaptic disinhibition via removal of inhibitory neurotransmitter  
69 receptors (Balaram et al., 2019; Sanes and Kotak, 2011; Sarro et al., 2008; Sturm et al., 2017; Sungchil  
70 Yang et al., 2011); 3) increased intrinsic excitability via changes in the amount and subunit composition of

71 voltage-gated ion channels that set the resting membrane potential, membrane resistance, and spike  
72 “burstiness” (Li et al., 2015, 2013; Pilati et al., 2012; Wu et al., 2016; Yang et al., 2012). These changes are  
73 often described as homeostatic plasticity, but in the context of adult plasticity after hearing loss they reflect a  
74 failure in homeostatic processes that maintain neural excitability at a stable set point. Whereas homeostatic  
75 changes – by definition – restore neural activity to a baseline activity rate following a perturbation  
76 (Turrigiano, 2012), neural gain adjustments following adult-onset hearing loss often over-shoot the mark,  
77 producing catastrophic downstream consequences at the level of network excitability and sound perception  
78 (Eggermont, 2017; Noreña, 2011).

79 Pinpointing the connection between excess neural gain and perceptual hypersensitivity disorders  
80 requires translating molecular and synaptic changes into measurements that can be made in intact and  
81 even behaving animals. With conventional microelectrode recordings, the synaptic and intrinsic  
82 compensatory processes described above manifest as increased spontaneous activity rates, increased  
83 spike synchrony, steeper slopes of sound intensity growth functions, and poor adaptation to background  
84 noise sources (for recent review see (Auerbach and Gritton, 2022; Herrmann and Butler, 2021b). The  
85 connection between these extracellular signatures of neural gain and auditory perceptual disorders has  
86 remained obscure, in part due to a frequent reliance on involuntary behaviors with a relationship to sound  
87 perception (for review see (Boyen et al., 2015; Brozoski and Bauer, 2016; Campolo et al., 2013; Hayes et  
88 al., 2014). Further, in vivo measurements have generally taken the form of acute recordings of local field  
89 potentials or unidentified excitatory and inhibitory unit types, often in anesthetized animals, and often  
90 without detailed measurements of the peripheral insult or the topographic correspondence between neural  
91 recording sites and deafferented map regions.

92 Here, we developed an approach to make more direct operant behavioral measurements of acoustic  
93 and neural hypersensitivity in mice with detailed characterizations of cochlear lesions. These behavioral  
94 measurements were combined with an optical approach to visualize spontaneous and sound-evoked  
95 calcium transients in awake mice from hundreds of individual excitatory neurons spanning the entire  
96 topographic map of the primary auditory cortex (A1). By performing these measurements before and after  
97 noise-induced SNHL, we were able to return to the same neurons over a 3-4 week period to identify  
98 baseline response features that could predict whether a given neuron would subsequently exhibit stable,  
99 homeostatic activity regulation or non-homeostatic excess gain following acoustic trauma.

100

## 101 **RESULTS**

102

### 103 **Perceptual hypersensitivity following noise-induced high-frequency sensorineural hearing loss**

104 In humans, a steeply sloping high-frequency hearing loss is a telltale signature of SNHL (Allen and  
105 Eddins, 2010; Hannula et al., 2011). We reviewed 132,504 case records from visitors to the audiology clinic  
106 at our institution and determined that 23% of pure tone audiograms fit the description of high-frequency  
107 SNHL (**Figure 1A**), underscoring that it is a common clinical condition that is commonly related to tinnitus,



108 loudness hypersensitivity, and poor speech intelligibility in noise (Horwitz et al., 2002; Lewis et al., 2020;  
109 Strelcyk and Dau, 2009). To model this hearing loss profile in genetically tractable laboratory mice, we  
110 induced sensorineural hearing loss through exposure to narrow-band high frequency noise (16-32 kHz) at  
111 103 dB SPL for 2 hours. Repeated cochlear function testing before and after noise exposure revealed a  
112 sustained elevation of high-frequency thresholds for auditory brainstem responses (ABR) and cochlear  
113 distortion product otoacoustic emissions (DPOAE) with minimal threshold elevation at low-frequencies  
114 (**Figure 1B-C**).

115 Post-mortem cochlear histopathology suggested an anatomical substrate for cochlear function  
116 changes due to acoustic trauma. Compared to age-matched unexposed control ears, high-frequency noise  
117 exposure eliminated approximately 50% of synaptic contacts between inner hair cells (IHCs) and primary  
118 cochlear afferent neurons in the high-frequency base of the cochlea (**Figure 1D**). Noise-induced outer hair  
119 cell (OHC) death was only observed in the high-frequency extreme of the cochlear base (**Figure 1E**),  
120 though more subtle OHC stereocilia damage was evident throughout mid- and high-frequency cochlear  
121 regions (**Figure 1F-G**).

122 To make a more direct comparison to clinical determination of hearing loss in humans via pure tone  
123 behavioral thresholds, we also performed behavioral tone detection in head-fixed mice (**Figure 1H**). Mice  
124 were trained to report their detection of low- or high-frequency tones (8 and 32 kHz, respectively) by licking  
125 a water reward spout shortly after tone delivery. Behavioral thresholds were determined with a modified 2-  
126 up, 1-down method-of-limits that presented a combination of liminal tone intensities along with no-tone  
127 catch trials (**Figure 1I**). Behavioral detection thresholds were measured every 1-3 days before and after  
128 noise-induced SNHL (N=7) and in control mice exposed to an innocuous noise level (sham, N=6), revealing  
129 a stable 45 dB increase in high-frequency tone threshold after traumatic noise exposure without  
130 commensurate changes in false alarm rates or low-frequency detection thresholds (**Figure 1J-K**, statistical  
131 analyses are provided in figure legends).

132

### 133 **Behavioral hypersensitivity to cochlear lesion edge frequencies and direct auditory thalamocortical** 134 **activation after SNHL.**

135 High-frequency OHC damage was the likely source of elevated ABR (Figure 1B) DPOAE (Figure  
136 1C) and behavioral detection (Figure 1K) thresholds. Eliminating approximately 50% of auditory nerve  
137 afferent synapses onto IHCs (Figure 1D) was not expected to affect physiological or behavioral measures of  
138 hearing threshold (Chambers et al., 2016a; Lobarinas et al., 2013) but would be expected to impact  
139 suprathreshold hearing performance. In human subjects, sensorineural hearing loss is associated with  
140 elevated audibility thresholds but a steeper growth in loudness perception at sound intensities above  
141 threshold, a phenomenon called loudness recruitment (Bacon and Oxenham, 2004). A closer inspection of  
142 the mouse psychometric detection functions for the spared low-frequency tone suggested something akin to  
143 the clinical phenomenon of loudness recruitment. Following acoustic trauma, the behavioral sensitivity index

144 (d-prime, or d') for 8 kHz tones grew more steeply for sound intensities near thresholds compared both to  
145 pre-exposure baseline detection functions or sham exposure controls (**Figure 2A-B**).

146 That intensity-detection slopes were increased for the low-frequency tone at near-threshold sound  
147 levels argues against a peripheral origin for this change and instead suggests increased gain in the central  
148 auditory pathway. To investigate this possibility more directly, we were inspired by pioneering work that  
149 directly stimulated deafferented central auditory nuclei to demonstrate a direct association between neural  
150 and behavioral hypersensitivity (Gerken, 1979). We adapted this approach using combined acoustic and  
151 optogenetic stimulation (Guo et al., 2015) to identify the involvement of auditory thalamocortical  
152 hyperactivity to perceptual hypersensitivity. We used an intersectional virus strategy to selectively activate  
153 channelrhodopsin-expressing auditory thalamocortical neurons (**Figure 2C**). Using a Go/NoGo operant  
154 task, detection probability was tested in alternating blocks for high frequency bandpass noise (centered at  
155 32kHz) or optogenetic thalamocortical stimulation. For the first week following acoustic trauma, high-  
156 frequency detection thresholds were elevated by approximately 50 dB (N=6), whereas sham exposure had  
157 no comparable effect (N=3; **Figure 2D**). Importantly, testing in interleaved trials revealed behaviorally  
158 hypersensitivity to direct stimulation of auditory thalamocortical neurons after acoustic trauma (**Figure 2E**),  
159 demonstrating significantly increased d' across optogenetic stimulation intensities compared to sham  
160 controls (**Figure 2F**). Although acoustic trauma can introduce changes in sound processing throughout all  
161 stages of central sound processing, the observation that behavioral hypersensitivity was observed to  
162 stimulation of thalamocortical projection neurons suggests that compensatory plasticity within the ACtx  
163 would be a reasonable place to investigate the neural underpinnings of loudness hypersensitivity following  
164 acoustic trauma.

165

### 166 **Chronic imaging in A1 reveals tonotopic remapping and dynamic spatiotemporal adjustments in** 167 **neural response gain after acoustic trauma**

168 Following topographically restricted cochlear lesions, neurons in deafferented ACtx map regions  
169 reorganize to preferentially encode spared cochlear frequencies bordering the damaged region without  
170 accompanying elevations in response threshold (Engineer et al., 2011; Norena et al., 2003; Robertson and  
171 Irvine, 1989; Seki and Eggermont, 2003a; S. Yang et al., 2011). Because the degree and form of cortical  
172 plasticity following cochlear deafferentation can differ between excitatory neurons and different types of  
173 inhibitory neurons (Masri et al., 2021; Resnik and Polley, 2021; Wang et al., 2022), we restricted ACtx  
174 activity measurements to excitatory neurons via chronic calcium imaging in *Thy1-GCaMP6s* x CBA mice,  
175 where expression of a high-sensitivity genetically encoded calcium indicator is limited to cortical PyrNs  
176 (Chen et al., 2013; Romero et al., 2019). In initial experiments, we performed widefield epifluorescence  
177 calcium imaging in awake mice, which offers simultaneous visualization of all fields within the ACtx at  
178 mesoscale resolution (**Figure 3A**). These experiments confirmed that tonotopic maps were relatively stable  
179 over ~4 weeks in mice with normal hearing experience (Issa et al., 2014; Romero et al., 2019) but

180 underwent large-scale reorganization throughout the week following acoustic trauma before stabilizing in a  
181 state that over-represented 8 -16 kHz tones that bordered the high-frequency cochlear lesion (**Figure 3B**).

182 Having confirmed that A1 was a promising target for more detailed characterizations, we changed  
183 our approach to 2-photon cellular-scale measurements of A1 layer 2/3 neurons (**Figure 3C**), a cortical layer  
184 that shows robust central gain enhancements after acoustic trauma (Parameshwarappa et al., 2022;  
185 Schormans et al., 2018). Individual L2/3 PyrNs exhibited strong tone-evoked transients and well-organized  
186 tonal receptive fields (**Figure 3D**) that were measured simultaneously across hundreds of PyrNs to reveal a  
187 coarse low-to-high frequency tonotopic gradient. We used a support vector machine (SVM) to bisect the  
188 pre-exposure A1 tonotopic map into a low-frequency intact zone and high-frequency deafferented zone  
189 (**Figure 3E, top**). By returning to the same A1 region for imaging every 1-3 days (**Figure 3F**), we confirmed  
190 that L2/3 PyrNs shifted their preferred frequency towards frequencies bordering the cochlear lesion (**Figure**  
191 **3E, bottom**). Analysis of all tone-responsive PyrNs (n = 1,749 in 4 trauma mice; n = 1,748 in 4 sham mice)  
192 demonstrated that tonotopic remapping was limited to the deafferented zone (**Figure 3G**), where the  
193 percentage of L2/3 PyrNs preferentially tuned to lesion edge frequencies more than doubled following  
194 acoustic trauma (**Figure 3H**) without any systematic change in response threshold (**Figure 3I**).

195 A marked increase in PyrNs tuned to lesion edge frequencies could contribute to the enhanced  
196 perceptual sensitivity to 8 kHz tones identified in behavioral experiments (Figure 2). To address the  
197 potential association between the neural and perceptual changes more explicitly, we measured the growth  
198 of PyrN responses across sound intensities as a function of both where neurons were located relative to the  
199 deafferentation boundary and when – following noise exposure – the measurement was made (**Figure 4**).  
200 We first quantified neural response gain as the change in PyrN response with increasing sound intensity,  
201 where the particular range of intensities used for the calculation was determined from the overall shape of  
202 the growth function (**Figure 5A, Supp Figure 1A**).

203 We noted that neural gain was broadly enhanced across the tonotopic map for the first several days  
204 following trauma but then receded to only the high-frequency deafferented regions in measurements made  
205 one week or more following noise exposure (**Figure 5B**). Next, we expanded the neural gain analysis in  
206 sham and trauma mice to four stimulus frequencies: a high-frequency tone aligned to the damaged cochlear  
207 region (32 kHz), a spared low-frequency tone far from the cochlear lesion (5.7 kHz), and two spared mid-  
208 frequency tones near the edge of the cochlear lesion (8 and 11.3 kHz). Neural gain at each of the four test  
209 frequencies were measured separately for intact and deafferented cortical zones and expressed in units of  
210 fold change relative to baseline gain measured from the corresponding population response prior to noise  
211 exposure. This analysis identified several clear results: *i*) a strong initial uptick in neural gain measured in  
212 both topographic regions following trauma; *ii*) persistent (lasting greater than 1 week) increases in neural  
213 gain were observed only for spared mid-frequency tones in deafferented cortical regions; *iii*) no significant  
214 changes in neural gain were observed in sham-exposed mice (**Figure 5C**). Thus, excess central gain  
215 depends on initial sound exposure level, *where* within the cortical frequency map the cell is located, *when*

216 relative to exposure the measurement is made, and the proximity of the stimulus test frequency to the  
217 cochlear lesion.

218

### 219 **Cortical hyperresponsivity and increased gain mirrors behavioral hypersensitivity to spared low-** 220 **frequency inputs**

221 In the Go/NoGo tone detection behavior, mice exhibited steepened 8 kHz detection functions after  
222 trauma (Figure 2B). Excess gain in A1 L2/3 PyrNs mirrored this result in that steepened neural growth  
223 functions were observed for 8 kHz tones over the same timescale. To more directly relate ACtx hyperactivity  
224 to perceptual hypersensitivity, we used a decoder to categorize the presence or absence of sound based on  
225 single-trial responses from hundreds of simultaneously recorded neurons located either in the intact or  
226 deafferented zone of the A1 map. This was accomplished by training an SVM classifier on PCA-  
227 decomposed population activity during short periods of tone presentation or silence (**Figure 5D**).  
228 Classification of single trial A1 ensemble responses supported the hypothesis that cortical discrimination of  
229 sound versus silence would be enhanced for low- and mid-intensity 8 kHz tones but reduced for 32 kHz  
230 tones after trauma (**Figure 5E**). Enhanced neural detection of 8 kHz tones was largely driven by PyrNs in  
231 deafferented map regions, whereas the loss of cortical sensitivity to high-frequency tones was observed in  
232 both topographic zones (**Figure 5F**).

233

### 234 **Tracking changes in activity and local synchrony in individual PyrNs over several weeks**

235 A principal advantage of chronic 2-photon calcium imaging lies in the ability to perform longitudinal  
236 assessment of activity changes in individual cells over relatively long time periods, essentially enabling  
237 individual cells to serve as their own control when evaluating changes after noise exposure. To track  
238 individual PyrNs over a several week period, imaging fields were first registered to a pre-exposure imaging  
239 session, and cell tracking was performed using probabilistic modeling (Sheintuch et al., 2017) (**Figure 6A-**  
240 **B, see Methods**). Some PyrNs could be tracked throughout all 15 imaging sessions and others just for a  
241 single session, where the overall tracking success did not vary systematically between exposure conditions  
242 (**Figure 6 – figure supplement 1A**) but did predictably vary depending on how liberal or conservative the  
243 threshold was set for chronic tracking confidence (**Figure 6 – figure supplement 1B**). Interestingly, we  
244 noted a turnover in the location of chronically tracked PyrNs exhibiting clear calcium transients related to  
245 noise exposure. Following traumatic – but not sham – noise exposure, active PyrNs appeared throughout  
246 the tonotopic map but disappeared in the high-frequency deafferented zone (**Figure 6 – figure supplement**  
247 **1C**). We set criteria for identifying chronically tracked cells by creating a control scenario in which a single  
248 imaging field from eight different mice were concatenated, allowing us to quantify the occurrence of falsely  
249 identified tracked cells across sessions. We observed a clear separation in the occurrence of veridically and  
250 falsely identified cells across sessions, where falsely tracked PyrNs over eight or more sessions with a  
251 confidence threshold of 0.8 were never observed, prompting us to use these criteria for the remainder of our  
252 analyses.

253 Chronic cell tracking allowed us to revisit analyses of central gain at the level of individual PyrNs,  
254 rather than across PyrN populations in intact or deafferented map regions. At this higher level of spatial  
255 specificity, we noted PyrNs exhibiting no increase or a temporary increase in response to an 8 kHz tone  
256 from cells in the intact (low frequency) zone and a permanent increase in responsiveness from cells in the  
257 deafferented (high frequency) zone (**Figure 6C**). More specifically, we noted transient hyper-  
258 responsiveness from 20 to 80 dB SPL for all neurons across A1 (**Figure 6D**) followed by a second stage of  
259 8 kHz hyper-responsivity restricted to intensities above 50 dB SPL (**Figure 6D**). These observations can  
260 account for performance changes in the population-level decoder (Figure 5E) and more generally confirm  
261 that the temporal and spatial patterns noted across populations of PyrNs are supported by commensurate  
262 plasticity of single PyrN responses.

263 Prior studies have noted increased spontaneous activity in acute single unit or multiunit recordings in  
264 the days following acoustic trauma, though it has not been clear whether that is driven by the unmasking of  
265 hitherto silent neurons (Figure 6 – figure supplement 1C) or increased activity rates of individual neurons  
266 over time (Kotak et al., 2005; Noreña et al., 2010; Noreña et al., 2003; Seki and Eggermont, 2003a).  
267 Normalizing by the pre-exposure period, in the noise-exposed mice there was approximately a 20%  
268 increase in cellular spontaneous activity across A1 compared to tracked cells from the sham-exposed mice  
269 (**Figure 7A-B**). Unlike the increase in edge frequency tone-responsiveness, increased spontaneous activity  
270 was not topographically restricted and continued to increase steadily with time after acoustic trauma (**Figure**  
271 **7B-C**).

272 Tinnitus and loudness hypersensitivity are thought to arise from a combination of increased activity  
273 rates as well as increased synchrony between cells (Auerbach et al., 2018, 2014; Resnik and Polley, 2021;  
274 Seki and Eggermont, 2003b; Shore and Wu, 2019). To determine how increased synchrony developed over  
275 topographic space and post-trauma time, we cross-correlated periods of spontaneous activity between pairs  
276 of A1 PyrNs and removed the influence of gross changes in activity rates through shuffle correction (**Figure**  
277 **7D, see Methods**). Using the area under the shuffle-corrected cross-correlogram as our index of pairwise  
278 synchrony (**Figure 7D**), we noted that synchronized activity normally decayed to asymptote once PyrNs  
279 were separated by more than 0.25mm (**Figure 7E, top**). In the first 72 hours following acoustic trauma,  
280 pairwise synchrony was significantly enhanced for PyrNs separated by as much as 0.7mm (**Figure 7E,**  
281 **bottom**). Three days after trauma and beyond, synchrony remained strongly elevated for PyrNs relative  
282 both to baseline and sham-exposed controls. Increased synchrony following trauma was primarily observed  
283 in PyrN's located close to – or straddling – the deafferentation boundary, where the peak of elevated  
284 synchrony was positioned within a tonotopic region corresponding to lesion edge sound frequencies (**Figure**  
285 **7F**).

286

287 **Predicting the degree of excess central gain after trauma in individual PyrNs based on their pre-**  
288 **exposure response features**



289 Chronic PyrN tracking brings cortical plasticity associated with acoustic trauma into sharper relief by  
290 specifying how changes unfold both in space and time at the level of single cells. It also underscores  
291 considerable heterogeneity in the expression of central gain changes between individual PyrNs. For  
292 example, for two PyrNs located within the deafferented region, one could show stable 8 kHz growth  
293 functions after trauma (**Figure 8A**) and the other excess gain (**Figure 8B**). To account for unexplained  
294 variability in central gain changes, we asked whether response features measured in the pre-exposure  
295 baseline period could predict whether neurons would express homeostatic or non-homeostatic regulation of  
296 sound-evoked activity. Returning to the same two example neurons, we noted that the PyrN that maintained  
297 stable gain had a relatively low spontaneous activity rate and sharp frequency tuning prior to acoustic  
298 trauma, whereas the PyrN that would express excess gain had higher spontaneous activity and a relatively  
299 broad pure tone receptive field (**Figure 8B-C**). Expanding this analysis to additional example neurons over  
300 post-exposure time further suggests that PyrNs that would go on to express non-homeostatic auditory  
301 growth functions tended to feature higher spontaneous activity levels at baseline (**Figure 8D**).

302 We used a multiple linear regression model to better capture how baseline properties can explain  
303 heterogenous changes in neural response gain. Central gain was operationally defined as the change in the  
304 area under the 8 kHz growth function relative to the PyrN's baseline growth function area (as per Figure 8A-  
305 B). Quantifying neural gain as fold change in the normalized 8 kHz growth function area recapitulated the  
306 same topographic and temporal dependence described above with intensity growth slope (**Figure 8 –**  
307 **figure supplement 1A**). To avoid overfitting the regression model, we selected a single timepoint - 3-5  
308 days after noise exposure - that captured the permanent changes after acoustic trauma while maximizing  
309 our sample size of chronically tracked PyrNs. As predictor variables, we selected various spontaneous and  
310 sound-evoked response baseline features along with features related to the physical position of the PyrN  
311 within the A1 tonotopic map (see Figure 8 legend).

312 We found that regressing the post-exposure change in neural gain on baseline PyrN's response  
313 features could account for approximately 40% of the variance in central gain changes after acoustic trauma  
314 but just 13% in sham-exposed where neural gain changes were small overall and far less systematic  
315 (**Figure 8E**). This is noteworthy because the model excluded features related to the degree of cochlear  
316 damage or reduced bottom-up sensory afferent drive, which are traditionally interpreted as the primary  
317 determinants of cortical central gain changes. To determine the weighting of each predictor variable to the  
318 overall model fit, we randomly shuffled each variable and refit the model to calculate the decrement in the  
319 adjusted R squared. The results are provided for all of the univariate predictors (**Figure 8F**) and all  
320 predictors including interaction terms (**Figure 8 – figure supplement 1B**). We observed that excess non-  
321 homeostatic gain regulation following acoustic trauma occurred with the highest probability in PyrNs  
322 exhibiting weak, monotonically increasing 8 kHz growth functions and higher spontaneous activity levels at  
323 baseline (**Figure 8G**). Further, PyrNs located in the high-frequency (deafferented) region but with a lower  
324 frequency BF further increased the likelihood of expressing excess neural gain after trauma (**Figure 8G**).  
325 Taken together, these findings show that certain idiosyncratic response features measured just prior to

326 acoustic trauma can predict whether A1 L2/3 PyrNs will undergo stable, homeostatic regulation or excess,  
327 non-homeostatic changes to a stimulus positioned near the edge of the cochlear lesion.

328

329

## 330 **DISCUSSION**

331 Here, we introduced a noise exposure protocol that selectively damages sensory neurons and  
332 neural afferents in the high-frequency base of the cochlea, providing a mouse model for the common high-  
333 frequency hearing loss profile in humans that is often associated with tinnitus, loudness hypersensitivity,  
334 and poor multitalker speech intelligibility (Figure 1). We demonstrated that behavioral hypersensitivity to  
335 spared, mid-frequency tones was also observed for direct stimulation of thalamocortical projection neurons,  
336 identifying the ACtx as a potential locus of plasticity underlying loudness hypersensitivity (Figure 2). We  
337 tracked ensembles of excitatory PyrNs over several weeks and confirmed large-scale reorganization of  
338 ACtx tonotopic maps (Figure 3) and sound intensity coding (Figure 4) that recapitulated the loudness  
339 hypersensitivity documented behaviorally (Figure 5). Neural hyperreactivity to spared mid-frequency sounds  
340 was accompanied by hyperactive and hypercorrelated spontaneous activity (Figure 7), where the degree of  
341 excess neural gain following acoustic trauma in individual neurons could be predicted from many of these  
342 response features measured during the pre-exposure baseline period (Figure 8). Collectively, these findings  
343 underscore the close association between excess cortical gain and disordered sound perception after  
344 cochlear sensorineural damage and identify activity signatures that predispose neurons to non-homeostatic  
345 hyperactivity following noise-induced hearing loss.

346

### 347 **Underlying mechanisms**

348 Loudness recruitment is a common auditory perceptual complaint associated with sensorineural hearing  
349 loss. Loudness recruitment describes a disproportionate growth of perceived loudness with sound level,  
350 resulting in a compression of the dynamic range separating the minimal audible level and uncomfortable  
351 loudness level. Excess central gain – an abnormally steep growth of neural response with sound intensity –  
352 is the hypothesized neural substrate of loudness recruitment and generalized hyperacusis (Auerbach et al.,  
353 2018, 2014; Zeng, 2020, 2013). Excess central gain is prominently in the ACtx of animals with  
354 sensorineural cochlear damage (Asokan et al., 2018; Chambers et al., 2016a; Norena et al., 2003;  
355 Parameshwarappa et al., 2022; Popelář et al., 1987; Qiu et al., 2000; Resnik and Polley, 2021, 2017; Seki  
356 and Eggermont, 2003b; Syka et al., 1994) by contrast to the auditory nerve, where sound-evoked neural  
357 responses are strongly reduced (Heinz et al., 2005; Heinz and Young, 2004; Wake et al., 1993). Excess  
358 central gain is also observed in subcortical stations of sound processing in animals with sensorineural  
359 cochlear damage (Chambers et al., 2016b; Kamke et al., 2003; Niu et al., 2013; Schrode et al., 2018;  
360 Shaheen and Liberman, 2018), but only particular cell types (Cai et al., 2009) and – in studies that have  
361 made direct inter-regional comparisons – is less robust than neural gain changes at the level of ACtx  
362 (Chambers et al., 2016a; Qiu et al., 2000).



363 Our findings build upon this literature by demonstrating excess central gain in L2/3 excitatory PyrNs  
364 that resembled behavioral hypersensitivity to spared mid-frequency tones. Seminal work demonstrated that  
365 animals became behaviorally hypersensitive to electrical microstimulation of central auditory neurons  
366 following cochlear damage (Gerken, 1979). Here we expanded on this observation by demonstrating that  
367 noise-exposed mice are behaviorally hypersensitive to direct activation of thalamocortical projection  
368 neurons, which further underscores the association between excess cortical gain and sound  
369 hypersensitivity. Hypersensitivity to direct stimulation of the thalamocortical pathway may be underpinned  
370 by changes in ACtx gene expression that result in elevated mRNA levels for glutamate receptor subunits  
371 and reduced mRNA transcripts and membrane-bound protein expression for GABAA receptor units  
372 (Balaram et al., 2019; Sarro et al., 2008). These adjustments in ligand-gated receptors have been  
373 associated with commensurate elevations in spontaneous excitatory postsynaptic currents and reduced  
374 inhibitory postsynaptic currents in PyrNs (Kotak et al., 2005; S. Yang et al., 2011). Thus, disinhibition and  
375 hypersensitization are conceptualized as synergistic compensatory responses that are triggered by a  
376 sudden decline in peripheral neural input, rendering cortical PyrNs less sensitive to feedforward inhibition  
377 from local inhibitory neurons – from parvalbumin-expressing (PV) fast-spiking interneurons in particular –  
378 and hyper-responsive to sound (Masri et al., 2021; Resnik and Polley, 2021, 2017).

379 One challenge to this purely bottom-up model for compensatory plasticity underlying excess central  
380 gain is that it cannot readily account for why neighboring neurons can exhibit such heterogenous changes in  
381 sound-evoked hyperresponsivity after peripheral damage. Here, we found that approximately 40% of the  
382 variability in excess central gain among individual PyrNs could be accounted for by their response  
383 properties measured in the days just prior to acoustic trauma. In particular, PyrNs with low spontaneous  
384 activity rates and greater responses to low-intensity tones – features associated with stronger intracortical  
385 inhibition (Tan et al., 2007; Wu et al., 2006) – showed more stable gain control after trauma. Conversely,  
386 PyrNs with response features suggesting weaker baseline inhibition showed the strongest excess gain after  
387 trauma.

388 Several recent findings support the idea that variations in the strength of intracortical inhibition can  
389 function as a watershed to produce dichotomous functional outcomes. In an earlier study, we applied  
390 ouabain to the cochlear round window to produce bilateral lesions of approximately 95% of cochlear afferent  
391 neurons. Near-complete elimination of cochlear afferent input was associated with functional deafness at  
392 the level of the ACtx in approximately half the animals but a remarkable recovery of sound responsiveness  
393 in the other half. Single unit recordings from the cohort of mice that recovered sound processing weeks after  
394 cochlear neural loss all featured a rapid decline in PV-mediated feedforward inhibition onto PyrNs during the  
395 first hours and days following the peripheral injury, while the mice that showed no functional recovery  
396 expressed a far slower decay in PV-mediated inhibition (Resnik and Polley, 2017). Another piece of  
397 evidence comes from ACtx single unit recordings in marmosets outfitted with unilateral cochlear implants.  
398 Single units with narrowly tuned, non-monotonic frequency response areas – presumably reflecting stronger  
399 local inhibition – were suppressed by spatially diffuse electrical stimulation of the auditory nerve, while units

400 with broad, V-shaped selectivity encoded cochlear input stimulation with high fidelity (Johnson et al., 2016).  
401 Collectively, these findings underscore that the effects of peripheral injury on central circuits are not  
402 exclusively determined by bottom-up drive but instead are also brokered by variations in the balance of  
403 excitation and inhibition within the local circuit or gene expression differences between individual cells. At a  
404 global level, these mitigating influences are shaped by developmental stage (Dorn et al., 2010; Harris et al.,  
405 2005; Sun et al., 2011) and circadian programs (Basinou et al., 2017), but – at the level of individual  
406 neurons – may reflect latent differences in genetic subtypes of L2/3 PyrNs or purely stochastic variations in  
407 inhibitory tone between different microcircuit milieus.

408

### 409 **Behavioral hypersensitivity: interpretations and technical limitations**

410 We found evidence of behavioral hypersensitivity to sound following acoustic trauma as measured  
411 by a steeper relationship between increasing tone intensity and detection ability in our Go/NoGo task  
412 (Figure 2). Although previous indicators of loudness sensitivity in animals have relied on more reflexive  
413 measures, such as the acoustic startle response (Hickox and Liberman, 2014; Sun et al., 2012), more  
414 recent work has utilized operant detection tasks including reaction times as an approximation of sound  
415 hypersensitivity (Auerbach et al., 2018). Here, we used a modified 2-up, 1 down design such that mice  
416 perform the task primarily near their perceptual threshold, where there is a large dynamic range to measure  
417 changes in task performance. Furthermore, to control for any changes in licking behavior due to acoustic  
418 trauma, our slope measurements are taken from functions using a sensitivity index ( $d'$ ), which normalizes  
419 lick probability according to the false alarm rate determined from the delivery of catch (silent) trials. Thus, a  
420 steeper relationship between increasing tone intensity and perceptual sensitivity strongly suggests a  
421 hypersensitivity to sound following acoustic trauma (Figure 2).

422 Hyperacusis describes a spectrum of aversive auditory qualities including increased loudness of  
423 moderate intensity sounds, a decrease in loudness tolerance, discomfort, pain, and even fear of sounds  
424 (Pienkowski et al., 2014a). The affective components of hyperacusis are more challenging to index in  
425 animals, particularly head-fixed behaviors, though progress is being made with active avoidance paradigms  
426 in freely moving animals (Manohar et al., 2017). Our evidence of hypersensitivity is likely more reflective of  
427 the sensory component of hyperacusis: an increase in perceived loudness relative to pre-exposure  
428 performance or mice that have not undergone acoustic trauma.

429 Measures of loudness perception in humans rely on various tasks, such as cross-modality matching,  
430 categorical loudness assessment, and simple magnitude estimation (Marozeau and Florentine, 2007).  
431 Go/NoGo detection behaviors do not accomplish the same direct assessment of loudness captured by  
432 these tasks, and instead rely on the average performance across tens or hundreds of trials in order to  
433 assemble a detection function. Instead, an operant behavior in which single trials directly assess loudness  
434 perception would prove extremely useful in animal studies of hearing loss and sound sensitivity, but such a  
435 task would require a more complicated design and training regimen (Alkharabsheh et al., 2017). Although  
436 many accumulated trials are necessary, we were able to acquire a detection function that approximates a

437 loudness growth function. By design, we focused our behavioral measurements on sound levels near  
438 threshold, to demonstrate loudness hypersensitivity at physical intensities far below the range implicated in  
439 cochlear loudness recruitment following OHC damage. Furthermore, our measured steepening of  
440 detection functions following noise exposure closely resembles theoretical altered loudness growth curves  
441 in models of hyperacusis (Zeng, 2020, 2013), underscoring the validity of our approach despite its  
442 simplicity.

443

#### 444 **Cortical hyperreactivity: interpretations and technical limitations**

445 Two-photon calcium imaging offers several key advantages for cortical plasticity studies including  
446 the ability to track single neurons over weeks (Figure 6) and genetic access to multiple cell types (Resnik  
447 and Polley, 2021). On the other hand, it can provide less insight into the mechanisms underlying  
448 destabilized excitatory-inhibitory balance than electrophysiological approaches (Resnik and Polley, 2017; S.  
449 Yang et al., 2011; Yang et al., 2012). Further, calcium indicators provide an approximation of neural activity  
450 and can be limited in their kinetics and reliability to report precise cellular events (Grienberger and  
451 Konnerth, 2012), although correct deconvolution and post-hoc analysis techniques can help to minimize  
452 issues introduced from calcium imaging (Sabatini, 2019).

453 Homeostatic Plasticity describes a negative feedback process that stabilizes neural activity levels  
454 following input perturbations. Homeostatic Plasticity mechanisms modify excitatory and inhibitory synapses  
455 over a period of hours or days to offset input perturbations and gradually restore spiking activity back to  
456 baseline levels (Turrigiano, 2012, 2008). Importantly, cytosolic calcium is itself the upstream barometer of  
457 activity that regulates the molecular signaling cascades underlying AMPA receptor scaling or GABA  
458 receptor removal (Harris and Rubel, 2006; Turrigiano, 2012). This underscores a key advantage to using  
459 calcium imaging in experiments that monitor network activity following perturbations of peripheral input  
460 levels: that although GCaMP is a closely related but indirect measure of spiking, it arguably provides more  
461 direct insight than spiking into the key upstream signal driving Homeostatic Plasticity signaling cascades.

462 Although we did not measure Homeostatic Plasticity per se, via direct demonstrations of intrinsic or  
463 heterosynaptic electrophysiological changes, our measurements of spontaneous and sound-evoked calcium  
464 transients clearly demonstrate a failure of homeostatic regulation following acoustic trauma. Spontaneous  
465 and sound-evoked calcium levels both remained elevated above pre-exposure baseline levels or levels  
466 observed in sham-exposed control mice. Hyperactive and hyper-correlated activity in regions of the cortical  
467 topographic map corresponding to peripheral sensorineural damage is widely understood to be the  
468 underlying neural basis of phantom sound perception in tinnitus. Here, we show that these changes are also  
469 a likely underlying neural substrate for auditory hypersensitivity, a core component of hyperacusis that often  
470 accompanies tinnitus (Cederroth et al., 2020; Schecklmann et al., 2014). These findings identify a  
471 neurophysiological target for testing therapeutic strategies in animals and inform the selection of non-  
472 invasive biomarkers for the development of improved diagnostics and therapies in human populations  
473 (Polley and Schiller, 2022).

474  
475  
476  
477

## MATERIALS AND METHODS

### Key Resources Table

| Reagent Type                            | Designation                               | Source or Reference  | Identifiers                                                                                                                 | Additional Information |
|-----------------------------------------|-------------------------------------------|----------------------|-----------------------------------------------------------------------------------------------------------------------------|------------------------|
| Genetic reagent ( <i>Mus musculus</i> ) | C57BL/6J-Tg(Thy1-GCaMP6s)GP4.12Dkim/J     | Jackson Laboratory   | JAX #025776                                                                                                                 | Male                   |
| Genetic reagent ( <i>Mus musculus</i> ) | CBA/CaJ                                   | Jackson Laboratory   | JAX #000654                                                                                                                 | Female                 |
| Genetic reagent ( <i>Mus Musculus</i> ) | C57BL/6J                                  | Jackson Laboratory   | JAX #000664                                                                                                                 | Male/Female            |
| Recombinant DNA reagent                 | AAVrg-pgk-Cre                             | Addgene              | Addgene #24593-AAVrg                                                                                                        |                        |
| Recombinant DNA reagent                 | AAV5-Ef1a-DIO hChr2(E123T/T159C)-EYFP     | Addgene              | Addgene #35509-AAV5                                                                                                         |                        |
| Antibody                                | ms(1gG1) $\alpha$ CtBP2                   | BD Transduction Labs | BDB612044                                                                                                                   | 1:200                  |
| Antibody                                | rb $\alpha$ MyosinVIIa                    | Proteus Biosciences  | 25-6790                                                                                                                     | 1:200                  |
| Antibody                                | ms(1gG2a) $\alpha$ GluA2                  | Millipore            | MAB397                                                                                                                      | 1:2000                 |
| Antibody                                | rb $\alpha$ Epsin                         | Sigma                | HPA028674                                                                                                                   | 1:100                  |
| Antibody                                | gt $\alpha$ ms (IgG2a) AF 488             | Thermo Fisher        | A-21131                                                                                                                     | 1:1000                 |
| Antibody                                | gt $\alpha$ ms (IgG1) AF 568              | Thermo Fisher        | A-21124                                                                                                                     | 1:1000                 |
| Antibody                                | dk $\alpha$ rb AF 647                     | Thermo Fisher        | A-31573                                                                                                                     | 1:200                  |
| Antibody                                | gt $\alpha$ rb PacBlue                    | Thermo Fisher        | P10994                                                                                                                      | 1:200                  |
| Chemical compound, drug                 | Lidocaine hydrochloride                   | Hospira Inc          | Cat #71-157-DK                                                                                                              |                        |
| Chemical compound, drug                 | Buprenorphine hydrochloride               | Buprenex             | Cat #NDC 12496-0757-5                                                                                                       |                        |
| Chemical compound, drug                 | Isoflurane                                | Piramal              | Cat #NDC 66794-013-10                                                                                                       |                        |
| Chemical compound, drug                 | Silicon adhesive                          | WPI                  | Cat #KWI-K-SIL                                                                                                              |                        |
| Chemical compound, drug                 | C&B Metabond Quick Adhesive Cement System | Parkwell             | Cat #S380                                                                                                                   |                        |
| Software, algorithm                     | Labview                                   | National Instruments | <a href="https://www.ni.com/en-us/shop/labview.html">https://www.ni.com/en-us/shop/labview.html</a>                         | Version 2015           |
| Software, algorithm                     | ThorImage 3.0                             | Thorlabs             | <a href="https://www.thorlabs.com/newgrouppage9.cfm?objectgroup">https://www.thorlabs.com/newgrouppage9.cfm?objectgroup</a> |                        |
| Software, algorithm                     | Suite2P                                   | Github               | <a href="https://github.com/cortex-lab/Suite2P">https://github.com/cortex-lab/Suite2P</a>                                   |                        |
| Software, algorithm                     | CellReg                                   | Github               | <a href="https://github.com/zivlab/CellReg">https://github.com/zivlab/CellReg</a>                                           |                        |
| Software, algorithm                     | MATLAB                                    | Mathworks            | <a href="https://www.mathworks.com/products/matlab.html">https://www.mathworks.com/products/matlab.html</a>                 | Version 2017b          |
| Other                                   | Solenoid driver                           | Eaton-Peabody Labs   | <a href="https://github.com/EPL-Engineering/epl_valve">https://github.com/EPL-Engineering/epl_valve</a>                     |                        |

|       |                       |                      |                                                                                                                   |  |
|-------|-----------------------|----------------------|-------------------------------------------------------------------------------------------------------------------|--|
| Other | Lickometer            | Eaton-Peabody Labs   | <a href="https://github.com/EPL-Engineering/epl_lickometer">https://github.com/EPL-Engineering/epl_lickometer</a> |  |
| Other | PXI Controller        | National Instruments | PXIe-8840                                                                                                         |  |
| Other | Free-field speaker    | Parts Express        | 275-010                                                                                                           |  |
| Other | Ti-Sapphire Laser     | Spectra Physics      | Mai Tai HP DeepSee                                                                                                |  |
| Other | 16x/.8NA Objective    | Nikon                | CFI75 LWD 16X W                                                                                                   |  |
| Other | Two-Photon Microscope | Thorlabs             | Bergamo II                                                                                                        |  |
| Other | Titanium headplate    | iMaterialise         | Custom                                                                                                            |  |
| Other | Diode laser (488 nm)  | Omnicon              | LuxX 488-100                                                                                                      |  |

478

479

480

481

## EXPERIMENTAL MODEL AND SUBJECT DETAILS

482

483

484

485

486

487

488

489

490

All procedures were approved by the Massachusetts Eye and Ear Animal Care and Use Committee and followed the guidelines established by the National Institute of Health for the care and use of laboratory animals. Imaging and tone Go/NoGo behavior were performed on Thy1-GCaMP6s x CBA mice. Combined acoustic and optogenetic Go/NoGo behavioral studies were performed in C57BL/6J mice. Mice of both sexes were used for this study. Mice were noise- or sham-exposed in the morning at 9 weeks postnatal. Mice were maintained on a 12 hr light/12 hr dark cycle. Mice were provided with *ad libitum* access to food and water unless they were on-study for behavioral testing, in which case they had restricted access to water in the home cage.

491

492

493

494

495

496

497

498

499

Data were collected from 44 mice. A total of 22 mice contributed data to behavioral tasks: 13 (N = 7/6, trauma/sham) to the tone Go/NoGo behavior and 9 (N = 6/3, trauma/sham) to the combined acoustic and optogenetic Go/NoGo behavior. A total of 10 mice contributed to the chronic imaging experiments: Two mice were used for widefield imaging (N = 1/1, trauma/sham) and 8 (N = 4/4, trauma/sham) to the two-photon imaging. Twelve mice were only used for regular ABR testing after acoustic trauma to determine the progression of threshold shift. Cochlear histology was performed on 11 of the mice used for Go/NoGo behavioral testing (N = 7/4, trauma/sham).

500

501

## METHOD DETAILS

502

503

504

505

506

507

508

509

510

### Survival surgeries for awake, head-fixed experiments

Mice were anesthetized with isoflurane in oxygen (5% induction, 1.5%–2% maintenance). A homeothermic blanket system was used to maintain body temperature at 36.6 (FHC). Lidocaine hydrochloride was administered subcutaneously to numb the scalp. The dorsal surface of the scalp was retracted and the periosteum was removed. The skull surface was prepped with etchant and 70% ethanol before affixing a titanium head plate to the dorsal surface with dental cement. At the conclusion of the headplate attachment and any additional procedures listed below, Buprenex (0.05 mg/kg) and meloxicam (0.1 mg/kg) were administered, and the animal was transferred to a warmed recovery chamber.

511

512

513

514

515

516

517

518

519

520

521

### High-frequency noise exposure

To induce acoustic trauma, octave-band noise at 16-32 kHz was presented at 103 dB SPL for 2 hours. Exposure stimulus was delivered via a tweeter fixated inside a custom-made exposure chamber (51 × 51 × 51 cm). The interior walls of the acoustic enclosure joined at irregular, non-right angles to minimize standing waves. Additionally, to further diffuse the high-frequency sound field, irregular surface depths were achieved on three of the interior walls by attaching stackable ABS plastic blocks (LEGO). Prior to exposure, mice were placed, unrestrained, in an independent wire-mesh chamber (15 × 15 × 10 cm). This chamber was placed at the center of a continuously rotating plate, ensuring mice were exposed to a relatively uniform sound field. Sham-exposed mice underwent the same procedure except that the exposure noise was presented at an innocuous level (40 dB SPL).

522

### Go/NoGo tone detection task



523 Three days after headplate surgery, animals were weighed and placed on a water restriction schedule (1  
524 mL per day). During behavioral training, animals were weighed daily to ensure they remained between 80-  
525 85% of their initial weight and regularly examined for signs of excess dehydration. Mice were given  
526 supplemental water if they received less than 1 mL during a training session or appeared excessively  
527 dehydrated. During testing, mice were head-fixed in a dimly lit, single-walled sound attenuating booth (ETS-  
528 Lindgren), with their bodies resting in an electrically conductive cradle. Tongue contact on the lickspout  
529 closed an electrical circuit that was digitized (at 40 Hz) and encoded to calculate lick timing. Digital and  
530 analog signals controlling sound delivery and water reward were controlled by a PXI system with custom  
531 software programmed in LabVIEW. Free-field stimuli were delivered via an inverted dome tweeter  
532 positioned 10 cm from the left ear and calibrated with a wide-band ultrasonic acoustic sensor (Knowles  
533 Acoustics).

534 Most mice required two weeks of behavioral shaping before they could perform the complete tone  
535 detection task with psychophysical staircasing. After mice were habituated to head-fixation, they were  
536 conditioned to lick the spout within 2 s following the onset of an 8 or 32 kHz 70 dB SPL tone (0.25 s  
537 duration, with 5ms raised cosine onset-offset ramps) to receive a small quantity of water (4  $\mu$ L). Trials had a  
538 variable inter-trial interval (4-10 s) randomly selected from a truncated exponential distribution. Once  
539 reaction times were consistently < 1 s, mice were trained to detect 8 kHz and 32 kHz tones in a 2-down, 1-  
540 up adaptive staircasing paradigm, where two correct detections were required to decrease the range of  
541 sound intensities by 5 dB SPL and one miss was required to increase the range of sound intensities by 5 dB  
542 SPL. At each iteration of the adaptive staircasing procedure, three trials were presented: a catch (silent) trial  
543 and tones at  $\pm$  5 dB SPL relative to the last intensity tested (Figure 1I). A single frequency was presented  
544 until 1 reversal was reached, and then the other tone was presented; a run was completed once 6 reversals  
545 had been reached for both frequencies. The first frequency presented each run was randomized.

546 Hits were defined as post-target licks that occurred > 0.1 s and < 1.5 s following the onset of the  
547 target tone. False alarms (Go responses on a catch trial) triggered a 5 s time out. Entire runs were excluded  
548 from analysis if the false alarm rate was greater than 30%. This exclusion criterion resulted in the  
549 elimination of < 5% of test runs across all conditions (before, after, noise- or sham-exposure), underscoring  
550 that mice were under stimulus control even if their hearing thresholds were elevated. Psychometric  
551 functions were fit using binary logistic regression. Threshold was defined as the average intensity at  
552 reversals across an entire session.

### 553 554 **Go/NoGo optogenetic detection task**

555 Headplate attachment, anesthesia and analgesia followed the procedure described above. Three burr holes  
556 were made in the skull over auditory cortex (1.75 – 2.25mm rostral to the lambdoid suture). We first  
557 expressed Cre-recombinase in neurons that project to the ACtx by injecting 150 nL of AAVrg-pgk-Cre  
558 0.5mm below the pial surface at three locations within the ACtx with a precision injection system (Nanoject  
559 III) coupled to a stereotaxic positioner (Kopf). A fourth injection was then performed to selectively express  
560 channelrhodopsin in auditory thalamocortical projection neurons by injecting 100 nL of AAV5-Ef1a-DIO  
561 hChR2(E123T/T159C)-EYFP in the MGBv (-2.95mm caudal to bregma, 2.16mm lateral to midline, 3.05mm  
562 below the pial surface). An optic fiber (flat tip, 0.2mm diameter, Thorlabs) was inserted at the MGB injection  
563 coordinates to a depth of 2.9mm below the pial surface. The fiber assembly was cemented in place and  
564 painted with black nail polish to prevent light leakage. Animals recovered for at least three days before  
565 water restriction and behavioral testing began.

566 After mice were habituated to head-fixation, they were conditioned to lick the spout within 2 s  
567 following the onset of 70 dB SPL high frequency bandpass noise (centered at 32 kHz, width 1 octave).  
568 Once consistent, mice were trained to detect optogenetic activation of thalamocortical neurons. The laser  
569 was pulsed at 10Hz, 10ms pulse width for 500ms, and the bandpass noise was pulsed at 10Hz, 20ms pulse  
570 width (5ms raised cosine onset-offset ramps) for 500 ms. For testing, randomized interleaved blocks of  
571 either noise or laser stimulation were presented at a range of levels, including catch trials. The range of  
572 sound levels and laser powers were tailored to each mouse prior to noise exposure to ensure equivalent  
573 sampling of sound and laser perceptual growth functions. We first defined the lowest laser power and sound  
574 level that produced at least 95% hit rates (operationally defined as “max”). Sound levels and laser powers  
575 were then presented at six attenuated levels relative to the maximum per day in each mouse. Psychometric  
576 functions were fit using binary logistic regression, and threshold was defined as the closest point where the

577 Go (lick) probability was equal to 50%. Runs were rejected for further analysis if the false alarm rate of the  
578 mouse was above 30%, and again this resulted in the exclusion of <5% of sessions.

579

## 580 **Widefield and two-photon calcium imaging**

581 Three round glass coverslips (two 3mm and one 4mm diameter, #1 thickness, Warner Instruments)  
582 were etched with piranha solution and bonded into a vertical stack using transparent, UV-cured adhesive  
583 (Norland Products, Warner Instruments). Headplate attachment, anesthesia and analgesia follow the  
584 procedure listed above. A circular craniotomy (3mm diameter) was made over the right ACtx using a scalpel  
585 and the coverslip stack was cemented into the craniotomy. Animals recovered for at least 5 days before  
586 beginning imaging recordings. All imaging was performed in awake, passively listening animals.

587 A series of pilot widefield imaging experiments were performed to visualize changes in all fields of  
588 the ACtx over a longer, 30–60-day post-exposure time period (N= 8 noise-exposed and 7 sham-exposed  
589 mice). The data collection procedure for these pilot experiments followed the methods described in detail in  
590 our previous publication (Romero et al., 2019). Briefly, widefield epifluorescence images were acquired with  
591 a tandem-lens microscope (THT-microscope, SciMedia) configured with low-magnification, high-numerical  
592 aperture lenses (PLAN APO, Leica, 2x and 1x for the objective and condensing lenses, respectively). Blue  
593 illumination was provided by a light-emitting diode (465 nm, LEX2-LZ4, SciMedia). Green fluorescence  
594 passed through a filter cube and was captured at 20Hz with a sCMOS camera (Zyla 4.2, Andor  
595 Technology).

596 Cellular imaging was performed with a 2-photon imaging system in a light-tight sound-attenuating  
597 enclosure mounted on a floating table (Bergamo II Galvo-Resonant 8 kHz scanning microscope, Thorlabs).  
598 An initial lower resolution epifluorescence widefield imaging session was performed with a CCD camera to  
599 visualize the tonotopic gradients of the ACtx and identify the position of A1 (as shown in Figure 3C). Two-  
600 photon excitation was provided by a Mai-Tai eHP DS Ti:Sapphire-pulsed laser tuned to 940 nm (Spectra-  
601 Physics). Imaging was performed with a 16x/0.8NA water-immersion objective (Nikon) from a 512 × 512  
602 pixel field of view at 30Hz with a Bergamo II Galvo-Resonant 8 kHz scanning microscope (Thorlabs).  
603 Scanning software (Thorlabs) was synchronized to the stimulus generation hardware (National Instruments)  
604 with digital pulse trains. The microscope was rotated by 50-60 degrees off the vertical axis to obtain images  
605 from the lateral aspect of the mouse cortex while the animal was maintained in an upright head position.  
606 Animals were monitored throughout the experiment to confirm all imaging was performed in the awake  
607 condition using modified cameras (PlayStation Eye, Sony) coupled to infrared light sources. Imaging was  
608 performed in layers L2/3, 175-225 μm below the pial surface. Fluorescence images were captured at 1×  
609 digital zoom, providing an imaging field of 0.84 × 0.84 mm.

610 Raw calcium movies were processed using Suite2P, a publicly available two-photon calcium  
611 imaging analysis pipeline (Pachitariu et al., 2016). Briefly, movies are registered to account for brain motion.  
612 Regions of interest are established by clustering neighboring pixels with similar time courses. Manual  
613 curation is then performed to eliminate low-quality or non-somatic regions of interest. Spike deconvolution  
614 was also performed in Suite2P, using the default method based on the OASIS algorithm (Friedrich et al.,  
615 2017). For chronic tracking of individual cells across imaging sessions, cross-day image registration was  
616 performed using a method outlined by Sheintuch et al (Sheintuch et al., 2017). Briefly, fields-of-view are  
617 aligned to a reference imaging session using a non-rigid transformation, and a probabilistic modeling  
618 approach is used to estimate whether neighboring cells from separate sessions are the same or different  
619 cells. To estimate the false positive rate with this approach, we also performed a control in which cross-day  
620 registration was performed with daily imaging fields randomly selected from different mice (Figure 6 –  
621 Figure Supplement 1). For all analysis of tracked neurons, only cells with a confidence score of at least 0.8  
622 (max of 1) and that were tracked for at least 8 of the 15 imaging sessions were used for the analysis.

623 During widefield imaging sessions, 20-70 dB SPL tones (in 10 dB steps) were presented from 4-64  
624 kHz in 0.5 octave steps. On the first and last two-photon imaging sessions and on the day of noise  
625 exposure, 20-80 dB SPL tones (15 dB steps) were presented from 4-45.3 kHz (0.5 octave steps). For all  
626 other two-photon imaging sessions, 20-80 dB SPL tones (in 10 dB steps) were presented at 5.7, 8, 11.3,  
627 and 32 kHz. Each day, all stimuli were repeated 20 times. One block consisted of all frequency-intensity  
628 combinations, and stimuli were randomized within blocks. Tones were 50 msec with 5ms raised cosine  
629 onset-offset ramps with 3s inter-trial intervals.

630

## 631 **Cochlear function tests**



632 Animals were anesthetized with ketamine (120 mg/kg) and xylazine (12 mg/kg), were placed on a  
633 homeothermic heating blanket during testing, with half the initial ketamine dose given as a booster when  
634 required. Acoustic stimuli were presented via in-ear acoustic assemblies consisting of two miniature  
635 dynamic earphones (CUI CDMG15008–03A) and an electret condenser microphone (Knowles FG-23339-  
636 PO7) coupled to a probe tube. Stimuli were calibrated in the ear canal in each mouse before recording.  
637 ABR stimuli were 5 ms tone pips at 8,12,16 or 32 kHz with a 0.5 ms rise-fall time delivered at 30 Hz.  
638 Intensity was incremented in 5 dB steps, from 20 to 100 dB SPL. ABR threshold was defined as the lowest  
639 stimulus level at which a repeatable waveform could be identified. DPOAEs were measured in the ear canal  
640 using primary tones with a frequency ratio of 1.2, with the level of the f2 primary set to be 10 dB less than f1  
641 level, incremented together in 5 dB steps. The 2f1-f2 DPOAE amplitude and surrounding noise floor were  
642 extracted. DPOAE threshold was defined as the lowest of at least two continuous f2 levels, for which the  
643 DPOAE amplitude was at least two standard deviations greater than the noise floor. DPOAE and ABR  
644 testing was performed one week before noise- or sham-exposure, and again immediately following the  
645 conclusion of behavioral testing or imaging.  
646

## 647 Cochlear histology

648 To visualize cochlear afferent synapses and inner- and outer- hair cells, cochleae were dissected  
649 and perfused through the round window and oval window with 4% paraformaldehyde in phosphate-buffered  
650 saline, then post-fixed in the same solution for 1 hour. Cochleae were then decalcified in 0.12M EDTA for 2  
651 days and dissected into half-turns for whole-mount processing. Immunostaining began with a blocking  
652 buffer (PBS with 5% normal goat or donkey serum and 0.2-1% Triton X-100) for 1 hour at room  
653 temperature. Whole mounts were then immunostained by incubating with a combination of the following  
654 primary antibodies: 1) rabbit anti-CtBP2 at 1:100, 2) rabbit anti-myosin VIIa at 1:200, 3) mouse anti-GluR2  
655 at 1:2,000 and secondary antibodies coupled to the red, blue, and green channels. Immunostained cochlear  
656 pieces were measured, and a cochlear frequency map was computed (Müller et al., 2005) to associate  
657 structures to relevant frequency regions using a plug-in to ImageJ (Parthasarathy and Kujawa, 2018).

658 Images were collected at 2400x900 raster using a using a high-resolution, oil immersion objective  
659 (63x, numerical aperture 1.3), and 1.25x zoom and assessed for signs of damage. Confocal z-stacks at  
660 identical frequencies were collected using a Leica TCS SP5 microscope to visualize hair cells and synaptic  
661 structures. Two adjacent stacks were obtained (78 um cochlear length per stack) at each target frequency  
662 spanning the cuticular plate to the synaptic pole of ~10 hair cells (in 0.25 um z-steps). Images were  
663 collected in a 1024 x 512 raster using a high-resolution, oil immersion objective (63x, numerical aperture  
664 1.3), and digital zoom (3.17x). Images were loaded into an image-processing software platform (Amira;  
665 VISAGE Imaging), where IHCs were quantified based on their Myosin VIIa-stained cell bodies and CtBP2-  
666 stained nuclei. Presynaptic ribbons and postsynaptic glutamate receptor patches were counted using 3D  
667 representations of each confocal z-stack. Juxtaposed ribbons and receptor puncta constitute a synapse,  
668 and these synaptic associations were determined by calculating and displaying the x–y projection of the  
669 voxel space within 1 um of each ribbon’s center(Liberman et al., 2011). OHCs were counted based on the  
670 myosin VIIa staining of their cell bodies. The mean number of cells per row of OHCs was used as a  
671 measure of OHC counts.

672 For visualizing OHC stereocilia damage, following similar whole-mount dissection and blocking  
673 procedures, the other ear was immunostained with a combination of the following primary antibodies 1)  
674 rabbit anti-CtBP2 at 1:100, 2) mouse anti-GluR2 at 1:2,000 and 3) rabbit anti-Espin at 1:100, followed by  
675 secondary antibodies in the red, green and gray channels. Confocal z-stacks of the stereocilia were  
676 collected at 5.6, 11.3, 22, 32, 45, and 64 kHz cochlear frequencies with a Leica TCS SP8 microscope.  
677

## 678 Brain histology

679 For mice performing the Go/NoGo optogenetic detection task, at the conclusion of behavioral testing mice  
680 were deeply anesthetized and prepared for transcardial perfusion with a 4% formalin solution in 0.1M  
681 phosphate buffer. The brains were extracted and post-fixed at room temperature for an additional 12 hours  
682 before transfer to 30% sucrose solution. Coronal sections (50um) were mounted onto glass slides using  
683 Vectashield with DAPI, and then coverslipped. Regions of interest were then imaged at 10x using a Leica  
684 DM5500B fluorescent microscope.  
685  
686

## 687 QUANTIFICATION AND STATISTICAL ANALYSIS

688

689

### Clinical database analysis

690

691

692

693

694

695

696

697

698

699

700

701

702

703

704

705

706

707

708

709

710

### Behavioral Analysis

711

712

713

714

715

716

717

718

### Two-photon image analysis

719

720

721

722

723

724

725

726

727

728

729

730

731

732

733

734

735

736

737

738

739

740

All analysis was performed on the deconvolved calcium activity traces. For analysis of tone-evoked responses, averaged deconvolved calcium traces were expressed as Z-score units relative to activity levels measured during the pre-stimulus period (833 ms). PyrNs were operationally defined as being responsive to a particular tone frequency/level combination with a  $Z > 2$ . For the three imaging sessions that calculated the full frequency response area, the minimum response threshold was defined for each PyrN as the lowest level at which there were responses to two adjacent frequencies (frequencies 0.5 octaves apart). Best frequency (BF) was defined as the frequency for which the overall response was maximal over the intensity range of threshold +30 dB. Analysis of BF changes were limited to PyrNs with pure tone receptive fields (neural  $d' > 1$ , as defined in Romero et al., 2019)).

To delineate the intact and deafferented regions of the imaging field, a support vector machine (SVM) was calculated for each mouse using BF's determined from the first day of imaging prior to noise exposure. The SVM deafferentation boundary categorized physical space (intact:  $BF < 16$  kHz, deafferented:  $BF \geq 16$  kHz) and its physical location was then imposed on all successive imaging sessions after alignment of fields-of-view from all imaging sessions. To categorize the position of a neuron, the adjusted centroid locations were used based on the best registration from the previously mentioned method. The distance of a neuron to the SVM deafferentation boundary was calculated as the shortest Euclidean distance.

Gain was defined as the relationship between sound level (input) and activity rate (output). The gain was calculated as the average rate of change over a range of sound levels. The particular set of sound levels selected for gain analysis was determined according to whether the best level occurred at low, mid, or high sound levels as illustrated in Figure 5 – Figure Supplement 1. For a neuron to be considered for an analysis of gain, it was required to have a significant response ( $Z > 2$ ) to at least 3 consecutive intensities.

741 Spontaneous activity was calculated from the 833 ms periods preceding tone onset. To quantify the  
742 correlated activity between cells, we cross-correlated the z-scored activity in the pre-stimulus periods. To  
743 control for the effects of overall changes in activity rates over sessions or between cells, shuffled cross-  
744 correlograms were generated for each pair by shuffling trial labels. Only cross-correlograms for which at  
745 least 3 consecutive lags had values significantly greater than the shuffled cross-correlogram (bootstrapped  
746  $p < 0.05$ , Bonferroni corrected for multiple comparisons) were used for analysis. The degree of correlated  
747 activity between each pair was defined as the size of the positive area under the peak of the shuffle-  
748 subtracted cross-correlogram (xcorr area).

749 To determine how ensemble activity decoded tone presence, we used an SVM classifier with a  
750 linear kernel (following the approach of Resnik and Polley, 2021). The SVM was run on the principal  
751 components of a data matrix consisting of the z-scored responses to single tone presentations or silent  
752 periods. PCA was used to reduce the influence of any inequities in sample sizes across mice or conditions.  
753 We ran the SVM on the minimum number of principal components required to explain 90% of the variance.  
754 Leave-one-out cross-validation was then used to train the classifier and compute the decoder accuracy. We  
755 repeated this process independently for each frequency intensity at 8 and 32kHz for each imaging session.  
756 The models were fit using the 'fitsvm' function in MATLAB.

757 To model how pre-exposure properties can predict the change in a neuron's responsiveness, the  
758 outcome variable was the post/pre-exposure ratio of the areas under the intensity-response growth function,  
759 where post was drawn from days 3-5 after exposure. All predictor variables were computed as average  
760 values from the pre-exposure period. The best linear model was fit using stepwise multiple linear regression  
761 using the Akaike information criterion. For the purposes of comparison, the predictor variables from the  
762 trauma model were applied to the sham model. The stepwise regression was fit using 'stepwiselm' and  
763 subsequent model fits used 'fitlm' in MATLAB.

764  
765

## 766 **Statistical analysis**

767 All statistical analyses were performed in MATLAB 2017b (Mathworks). Data are reported as mean  $\pm$  SEM  
768 unless otherwise indicated. Post hoc pairwise comparisons were adjusted for multiple comparisons using  
769 the Bonferroni correction.

770  
771

## 772 **Acknowledgements**

773 These studies were supported by a grant from the Nancy Lurie Marks Family Foundation (DP and AT), NIH  
774 grant DC009836 (DP), DC015857 (DP and SK), DC018353 (AT), and NIH fellowship DC018974-02 (MM)  
775 and DC014871 (AH).

776 MM collected and analyzed all 2-photon calcium imaging data. MM, DC, and YW collected behavioral data  
777 with analysis by MM and pilot studies by KC. MM and AH collected widefield calcium data. MM and AH  
778 collected and analyzed ABR and DPOAE data. AP performed the human database analysis as well as  
779 cochlear histology analysis with guidance from SK. KH programmed the software for behavioral data  
780 collection. AH and KH developed the hardware and software for high-frequency noise exposure, with  
781 guidance from SK. DP, AT, KH, SK, AH, and MM designed the experiments. DP, MM, AH, and AP  
782 prepared the figures. DP and MM wrote the manuscript, with input from all authors.

783 We thank MC Liberman and A Indzhykulian for their assistance with hair cell stereocilia imaging.

784

## 785 **Competing interests**

786 The authors declare that no competing interests exist.

787  
788

## 789 References

790

- 791 Alkharabsheh A, Xiong F, Xiong B, Manohar S, Chen G, Salvi R, Sun W. 2017. Early age noise exposure increases  
792 loudness perception - A novel animal model of hyperacusis. *Hearing Research* **347**:11–17.  
793 doi:10.1016/j.heares.2016.06.018
- 794 Allen PD, Eddins DA. 2010. Presbycusis phenotypes form a heterogeneous continuum when ordered by degree and  
795 configuration of hearing loss. *Hearing Research* **264**:10–20. doi:10.1016/j.heares.2010.02.001
- 796 Arciniegas, MD D, Adler, MD L, Topkoff J, Cawthra, RN E, Filley, MD CM, Reite, MD M. 1999. Subject Review:  
797 Attention and memory dysfunction after traumatic brain injury: cholinergic mechanisms, sensory gating, and  
798 a hypothesis for further investigation. *Brain Injury* **13**:1–13. doi:10.1080/026990599121827
- 799 Asokan MM, Williamson RS, Hancock KE, Polley DB. 2018. Sensory overamplification in layer 5 auditory corticofugal  
800 projection neurons following cochlear nerve synaptic damage. *Nature Communications* **9**.  
801 doi:10.1038/s41467-018-04852-y
- 802 Auerbach BD, Gritton HJ. 2022. Hearing in Complex Environments: Auditory Gain Control, Attention, and Hearing  
803 Loss. *Front Neurosci* **16**:799787. doi:10.3389/fnins.2022.799787
- 804 Auerbach BD, Radziwon K, Salvi R. 2018. Testing the Central Gain Model: Loudness Growth Correlates with Central  
805 Auditory Gain Enhancement in a Rodent Model of Hyperacusis. *Neuroscience*.  
806 doi:10.1016/j.neuroscience.2018.09.036
- 807 Auerbach BD, Rodrigues P V., Salvi R. 2014. Central gain control in tinnitus and hyperacusis. *Frontiers in Neurology*  
808 **5**:206–227. doi:10.3389/fneur.2014.00206
- 809 Bacon SP, Oxenham AJ. 2004. Psychophysical Manifestations of Compression: Hearing-Impaired Listeners In: Bacon  
810 SP, Fay RR, Popper AN, editors. *Compression: From Cochlea to Cochlear Implants*, Springer Handbook of  
811 Auditory Research. New York: Springer-Verlag. pp. 107–152. doi:10.1007/0-387-21530-1\_4
- 812 Balaram P, Hackett TA, Polley DB. 2019. Synergistic transcriptional changes in AMPA and GABA A receptor genes  
813 support compensatory plasticity following unilateral hearing loss. *Neuroscience* **407**:108–119.  
814 doi:10.1016/j.neuroscience.2018.08.023
- 815 Basinou V, Park J sub, Cederroth CR, Canlon B. 2017. Circadian regulation of auditory function. *Hearing Research*  
816 **347**:47–55. doi:10.1016/j.heares.2016.08.018
- 817 Boyen K, Baskent D, van Dijk P. 2015. The Gap Detection Test: Can It Be Used to Diagnose Tinnitus? *Ear and Hearing*  
818 **36**:e138. doi:10.1097/AUD.0000000000000156
- 819 Brozoski TJ, Bauer CA. 2016. Animal models of tinnitus. *Hearing Research* **338**:88–97.  
820 doi:10.1016/j.heares.2015.10.011
- 821 Cai S, Ma W-LD, Young ED. 2009. Encoding intensity in ventral cochlear nucleus following acoustic trauma:  
822 implications for loudness recruitment. *JARO* **10**:5–22. doi:10.1007/s10162-008-0142-y
- 823 Campolo J, Lobarinas E, Salvi R. 2013. Does tinnitus “fill in” the silent gaps? *Noise and Health* **15**:398.  
824 doi:10.4103/1463-1741.121232
- 825 Cederroth CR, Lugo A, Edvall NK, Lazar A, Lopez-Escamez J-A, Bulla J, Uhlen I, Hoare DJ, Baguley DM, Canlon B, Gallus  
826 S. 2020. Association between Hyperacusis and Tinnitus. *J Clin Med* **9**. doi:10.3390/jcm9082412
- 827 Chambers AR, Resnik J, Yuan Y, Whitton JP, Edge AS, Liberman MC, Polley DB. 2016a. Central gain restores auditory  
828 processing following near-complete cochlear denervation. *Neuron* **89**:1–13.  
829 doi:10.1016/j.neuron.2015.12.041
- 830 Chambers AR, Salazar JJ, Polley DB. 2016b. Persistent thalamic sound processing despite profound cochlear  
831 denervation. *Frontiers in Neural Circuits* **10**:1–13. doi:10.3389/fncir.2016.00072
- 832 Chen T-W, Wardill TJ, Sun Y, Pulver SR, Renninger SL, Baohan A, Schreiter ER, Kerr RA, Orger MB, Jayaraman V, Looger  
833 LL, Svoboda K, Kim DS. 2013. Ultrasensitive fluorescent proteins for imaging neuronal activity. *Nature*  
834 **499**:295–300.
- 835 Dorrn AL, Yuan K, Barker AJ, Schreiner CE, Froemke RC. 2010. Developmental sensory experience balances cortical  
836 excitation and inhibition. *Nature* **465**:932–936.
- 837 Dubno JR, Eckert MA, Lee FS, Matthews LJ, Schmiedt RA. 2013. Classifying Human Audiometric Phenotypes of Age-  
838 Related Hearing Loss from Animal Models. *Jaro-Journal of the Association for Research in Otolaryngology*  
839 **14**:687–701. doi:10.1007/s10162-013-0396-x



- 840 Eggermont JJ. 2017. Acquired hearing loss and brain plasticity. *Hearing Research* **343**:176–190.  
841 doi:10.1016/j.heares.2016.05.008
- 842 Ehlers A, Clark DM. 2000. A cognitive model of posttraumatic stress disorder. *Behaviour Research and Therapy*  
843 **38**:319–345. doi:10.1016/S0005-7967(99)00123-0
- 844 Engineer ND, Riley JR, Seale JD, Vrana WA, Shetake JA, Sudanagunta SP, Borland MS, Kilgard MP. 2011. Reversing  
845 pathological neural activity using targeted plasticity. *Nature* **470**:101. doi:10.1038/nature09656
- 846 Friedrich J, Zhou P, Paninski L. 2017. Fast online deconvolution of calcium imaging data. *PLoS Comput Biol*  
847 **13**:e1005423. doi:10.1371/journal.pcbi.1005423
- 848 Garfinkel SN, Liberzon I. 2009. Neurobiology of PTSD: A Review of Neuroimaging Findings. *Psychiatric Annals* **39**.  
849 doi:10.3928/00485713-20090527-01
- 850 Gerber W, Schoenen J. 1998. Biobehavioral Correlates in Migraine: The Role of Hypersensitivity and Information-  
851 Processing Dysfunction. *Cephalalgia* **18**:5–11. doi:10.1177/0333102498018S2103
- 852 Gerken GM. 1979. Central denervation hypersensitivity in the auditory system of the cat. *J Acoust Soc Am* **66**:721–  
853 727. doi:10.1121/1.383222
- 854 Ghanizadeh A. 2011. Sensory Processing Problems in Children with ADHD, a Systematic Review. *Psychiatry Investig*  
855 **8**:89. doi:10.4306/pi.2011.8.2.89
- 856 Goadsby PJ, Holland PR, Martins-Oliveira M, Hoffmann J, Schankin C, Akerman S. 2017. Pathophysiology of Migraine:  
857 A Disorder of Sensory Processing. *Physiological Reviews* **97**:553–622. doi:10.1152/physrev.00034.2015
- 858 González-Rodríguez A, Labad J, Seeman MV. 2021. Pain Sensitivity in Schizophrenia Spectrum Disorders: A Narrative  
859 Review of Recent Work. *Psychiatry International* **2**:48–58. doi:10.3390/psychiatryint2010004
- 860 Grienberger C, Konnerth A. 2012. Imaging Calcium in Neurons. *Neuron* **73**:862–885.  
861 doi:10.1016/j.neuron.2012.02.011
- 862 Guo W, Hight AE, Chen JX, Klapoetke NC, Hancock KE, Shinn-Cunningham BG, Boyden ES, Lee DJ, Polley DB. 2015.  
863 Hearing the light: neural and perceptual encoding of optogenetic stimulation in the central auditory pathway.  
864 *Scientific Reports* **5**:10319–10319. doi:10.1038/srep10319
- 865 Hannula S, Bloigu R, Majamaa K, Sorri M, Mäki-Torkko E. 2011. Audiogram configurations among older adults:  
866 Prevalence and relation to self-reported hearing problems. *International Journal of Audiology* **50**:793–801.  
867 doi:10.3109/14992027.2011.593562
- 868 Harris JA, Hardie NA, Bermingham-McDonogh O, Rubel EW. 2005. Gene expression differences over a critical period  
869 of afferent-dependent neuron survival in the mouse auditory brainstem. *Journal of Comparative Neurology*  
870 **493**:460–474. doi:10.1002/cne.20776
- 871 Harris JA, Rubel EW. 2006. Afferent regulation of neuron number in the cochlear nucleus: Cellular and molecular  
872 analyses of a critical period. *Hearing Research* **216–217**:127–137. doi:10.1016/j.heares.2006.03.016
- 873 Hayes SH, Radziwon KE, Stolzberg DJ, Salvi RJ. 2014. Behavioral models of tinnitus and hyperacusis in animals.  
874 *Frontiers in neurology* **5**:179–179.
- 875 Hebert S, Fournier P, Norena A. 2013. The Auditory Sensitivity is Increased in Tinnitus Ears. *Journal of Neuroscience*  
876 **33**:2356–2364. doi:10.1523/JNEUROSCI.3461-12.2013
- 877 Heinz MG, Issa JB, Young ED. 2005. Auditory-nerve rate responses are inconsistent with common hypotheses for the  
878 neural correlates of loudness recruitment. *Journal of the Association for Research in Otolaryngology* **6**:91–  
879 105. doi:10.1007/s10162-004-5043-0
- 880 Heinz MG, Young ED. 2004. Response growth with sound level in auditory-nerve fibers after noise-induced hearing  
881 loss. *Journal of Neurophysiology* **91**:784–795. doi:10.1152/jn.00776.2003
- 882 Herrmann B, Butler BE. 2021a. Aging auditory cortex Assessments, Treatments and Modeling in Aging and  
883 Neurological Disease. Elsevier. pp. 183–192. doi:10.1016/B978-0-12-818000-6.00017-2
- 884 Herrmann B, Butler BE. 2021b. Hearing loss and brain plasticity: the hyperactivity phenomenon. *Brain Struct Funct*  
885 **226**:2019–2039. doi:10.1007/s00429-021-02313-9
- 886 Hickox AE, Liberman MC. 2014. Is noise-induced cochlear neuropathy key to the generation of hyperacusis or  
887 tinnitus? *Journal of Neurophysiology* **111**:552–564. doi:10.1152/jn.00184.2013
- 888 Horwitz AR, Dubno JR, Ahlstrom JB. 2002. Recognition of low-pass-filtered consonants in noise with normal and  
889 impaired high-frequency hearing. *The Journal of the Acoustical Society of America* **111**:409–16.  
890 doi:10.1121/1.1427357

- 891 Issa JB, Haeffele BD, Agarwal A, Bergles DE, Young ED, Yue DT. 2014. Multiscale optical Ca<sup>2+</sup> imaging of tonal  
892 organization in mouse auditory cortex. *Neuron* 1–16.
- 893 Johnson LA, Della Santina CC, Wang X. 2016. Selective Neuronal Activation by Cochlear Implant Stimulation in  
894 Auditory Cortex of Awake Primate. *J Neurosci* **36**:12468–12484. doi:10.1523/JNEUROSCI.1699-16.2016
- 895 Kamke MR, Brown M, Irvine DRF. 2003. Plasticity in the tonotopic organization of the medial geniculate body in adult  
896 cats following restricted unilateral cochlear lesions. *The Journal of Comparative Neurology* **459**:355–367.
- 897 Klintwall L, Holm A, Eriksson M, Carlsson LH, Olsson MB, Hedvall Å, Gillberg C, Fernell E. 2011. Sensory abnormalities  
898 in autism. *Research in Developmental Disabilities* **32**:795–800. doi:10.1016/j.ridd.2010.10.021
- 899 Kotak VC, Fujisawa S, Lee FA, Karthikeyan O, Aoki C, Sanes DH. 2005. Hearing loss raises excitability in the auditory  
900 cortex. *The Journal of neuroscience : the official journal of the Society for Neuroscience* **25**:3908–18.  
901 doi:10.1523/JNEUROSCI.5169-04.2005
- 902 Lewis RM, Jahn KN, Parthasarathy A, Goedicke WB, Polley DB. 2020. Audiometric Predictors of Bothersome Tinnitus  
903 in a Large Clinical Cohort of Adults With Sensorineural Hearing Loss. *Otology & Neurotology* **41**:e414–e421.  
904 doi:10.1097/MAO.0000000000002568
- 905 Li S, Choi V, Tzounopoulos T. 2013. Pathogenic plasticity of Kv7. 2/3 channel activity is essential for the induction of  
906 tinnitus. *Proceedings of the National ...* **110**:9980–9985. doi:10.1073/pnas.1216671110/  
907 /DCSupplemental.www.pnas.org/cgi/doi/10.1073/pnas.1302770110
- 908 Li S, Kalappa BI, Tzounopoulos T. 2015. Noise-induced plasticity of KCNQ2/3 and HCN channels underlies vulnerability  
909 and resilience to tinnitus. *eLife* **4**:1–23. doi:10.7554/eLife.0724
- 910 Liberman LD, Wang H, Liberman MC. 2011. Opposing gradients of ribbon size and AMPA receptor expression underlie  
911 sensitivity differences among cochlear-nerve/hair-cell synapses. *Journal of Neuroscience* **31**:801–808.  
912 doi:10.1523/JNEUROSCI.3389-10.2011
- 913 Lobarinas E, Salvi R, Ding D. 2013. Insensitivity of the audiogram to carboplatin induced inner hair cell loss in  
914 chinchillas. *Hearing research* 1–8.
- 915 Luck SJ, Gold JM. 2008. The Construct of Attention in Schizophrenia. *Biological Psychiatry* **64**:34–39.  
916 doi:10.1016/j.biopsych.2008.02.014
- 917 Manohar S, Spoth J, Radziwon K, Auerbach BD, Salvi R. 2017. Noise-induced hearing loss induces loudness intolerance  
918 in a rat Active Sound Avoidance Paradigm (ASAP). *Hearing Research* **353**:197–203.  
919 doi:10.1016/j.heares.2017.07.001
- 920 Marozeau J, Florentine M. 2007. Loudness growth in individual listeners with hearing losses: A review. *The Journal of*  
921 *the Acoustical Society of America* **122**:EL81–EL87. doi:10.1121/1.2761924
- 922 Masri S, Chan N, Marsh T, Zinsmaier A, Schaub D, Zhang L, Wang W, Bao S. 2021. Chemogenetic Activation of Cortical  
923 Parvalbumin-Positive Interneurons Reverses Noise-Induced Impairments in Gap Detection. *J Neurosci*  
924 **41**:8848–8857. doi:10.1523/JNEUROSCI.2687-19.2021
- 925 Müller M, Von Hünerbein K, Hoidis S, Smolders JWT. 2005. A physiological place-frequency map of the cochlea in the  
926 CBA/J mouse. *Hearing Research* **202**:63–73. doi:10.1016/j.heares.2004.08.011
- 927 Nampiaparampil DE. 2008. Prevalence of Chronic Pain After Traumatic Brain Injury: A Systematic Review. *JAMA*  
928 **300**:711. doi:10.1001/jama.300.6.711
- 929 Nielsen LA, Henriksson KG. 2007. Pathophysiological mechanisms in chronic musculoskeletal pain (fibromyalgia): the  
930 role of central and peripheral sensitization and pain disinhibition. *Best Practice & Research Clinical*  
931 *Rheumatology, General Musculoskeletal Conditions* **21**:465–480. doi:10.1016/j.berh.2007.03.007
- 932 Niu Y, Kumaraguru A, Wang R, Sun W. 2013. Hyperexcitability of inferior colliculus neurons caused by acute noise  
933 exposure. *Journal of Neuroscience Research* **91**:292–299. doi:10.1002/jnr.23152
- 934 Noreña AJ. 2011. An integrative model of tinnitus based on a central gain controlling neural sensitivity. *Neuroscience*  
935 *and Biobehavioral Reviews* **35**:1089–1109. doi:10.1016/j.neubiorev.2010.11.003
- 936 Noreña AJ, Moffat G, Blanc JL, Pezard L, Cazals Y. 2010. Neural changes in the auditory cortex of awake guinea pigs  
937 after two tinnitus inducers: salicylate and acoustic trauma. *Neuroscience* **166**:1194–1209.  
938 doi:10.1016/j.neuroscience.2009.12.063
- 939 Noreña AJ, Tomita M, Eggermont JJ. 2003. Neural Changes in Cat Auditory Cortex After a Transient Pure-Tone  
940 Trauma. *Journal of Neurophysiology* **90**:2387–2401. doi:10.1152/jn.00139.2003
- 941 Nusbaum NJ. 1999. Aging and Sensory Senescence: *Southern Medical Journal* **92**:267–275. doi:10.1097/00007611-  
942 199903000-00002

- 943 Pachitariu M, Stringer C, Dipoppa M, Schröder S, Rossi LF, Dipoppa M, Rossi LF, Carandini M, Harris KD. 2016.  
944 Suite2p : beyond 10 , 000 neurons with standard two-photon microscopy. *bioRxiv* 1–30. doi:10.1101/061507
- 945 Parameshwarappa V, Pezard L, Noreña AJ. 2022. Changes in the spatiotemporal pattern of spontaneous activity  
946 across a cortical column after noise trauma. *Journal of Neurophysiology* **127**:239–254.  
947 doi:10.1152/jn.00262.2021
- 948 Parthasarathy A, Hancock KE, Bennett K, DeGruttola V, Polley DB. 2020a. Bottom-up and top-down neural  
949 signatures of disordered multi-talker speech perception in adults with normal hearing. *eLife* **9**.  
950 doi:10.7554/eLife.51419
- 951 Parthasarathy A, Kujawa SG. 2018. Synaptopathy in the Aging Cochlea: Characterizing Early-Neural Deficits in  
952 Auditory Temporal Envelope Processing. *J Neurosci* **38**:7108–7119. doi:10.1523/JNEUROSCI.3240-17.2018
- 953 Parthasarathy A, Romero Pinto S, Lewis RM, Goedicke W, Polley DB. 2020b. Data-driven segmentation of audiometric  
954 phenotypes across a large clinical cohort. *Scientific Reports* **10**:6704. doi:10.1038/s41598-020-63515-5
- 955 Pienkowski M, Tyler RS, Roncancio ER, Jun HJ, Brozoski T, Dauman N, Coelho CB, Andersson G, Keiner AJ, Cacace AT,  
956 Martin N, Moore BCJ. 2014a. A Review of Hyperacusis and Future Directions: Part I. Definitions and  
957 Manifestations Richard. *American Journal of Audiology* **23**:402–419. doi:10.1044/2014
- 958 Pienkowski M, Tyler RS, Roncancio ER, Jun HJ, Brozoski T, Dauman N, Coelho CB, Andersson G, Keiner AJ, Cacace AT,  
959 Martin N, Moore BCJ. 2014b. A Review of Hyperacusis and Future Directions: Part II. Measurement,  
960 Mechanisms, and Treatment Martin. *American Journal of Audiology* **23**:420–436. doi:10.1044/2014
- 961 Pilati N, Ison MJ, Barker M, Mulheran M, Large CH, Forsythe ID, Matthias J, Hamann M. 2012. Mechanisms  
962 contributing to central excitability changes during hearing loss. *Proceedings of the National Academy of  
963 Sciences of the United States of America* **109**:8292–8297. doi:10.1073/pnas.1116981109
- 964 Polley DB, Schiller D. 2022. The promise of low-tech intervention in a high-tech era: Remodeling pathological brain  
965 circuits using behavioral reverse engineering. *Neuroscience & Biobehavioral Reviews* **137**:104652.  
966 doi:10.1016/j.neubiorev.2022.104652
- 967 Popelář J, Syka J, Berndt H. 1987. Effect of noise on auditory evoked responses in awake guinea pigs. *Hearing Research*  
968 **26**:239–247. doi:10.1016/0378-5955(87)90060-8
- 969 Qiu C, Salvi R, Ding D, Burkard R. 2000. Inner hair cell loss leads to enhanced response amplitudes in auditory cortex  
970 of unanesthetized chinchillas: evidence for increased system gain. *Hearing Research* **139**:153–171.  
971 doi:10.1016/S0378-5955(99)00171-9
- 972 Resnik J, Polley DB. 2021. Cochlear neural degeneration disrupts hearing in background noise by increasing auditory  
973 cortex internal noise. *Neuron* **109**:984–96. doi:10.1016/j.neuron.2021.01.015
- 974 Resnik J, Polley DB. 2017. Fast-spiking GABA circuit dynamics in the auditory cortex predict recovery of sensory  
975 processing following peripheral nerve damage. *eLife* **6**. doi:10.7554/eLife.21452
- 976 Robertson CE, Baron-Cohen S. 2017. Sensory perception in autism. *Nat Rev Neurosci* **18**:671–684.  
977 doi:10.1038/nrn.2017.112
- 978 Robertson D, Irvine DRF. 1989. Plasticity of frequency organization in auditory cortex of guinea pigs with partial  
979 unilateral deafness. *The Journal of comparative neurology* **282**:456–471. doi:10.1002/cne.902820311
- 980 Romero S, Hight AE, Clayton KK, Resnik J, Williamson RS, Hancock KE, Polley DB. 2019. Cellular and widefield imaging  
981 of sound frequency organization in primary and higher-order fields of the mouse auditory cortex. *Cerebral  
982 Cortex*. doi:10.1101/663021
- 983 Sabatini BL. 2019. The impact of reporter kinetics on the interpretation of data gathered with fluorescent reporters  
984 (preprint). *Neuroscience*. doi:10.1101/834895
- 985 Sanes DH, Kotak VC. 2011. Developmental plasticity of auditory cortical inhibitory synapses. *Hearing Research*  
986 **279**:140–148. doi:10.1016/j.heares.2011.03.015
- 987 Sarro EC, Kotak VC, Sanes DH, Aoki C. 2008. Hearing loss alters the subcellular distribution of presynaptic GAD and  
988 postsynaptic GABAA receptors in the auditory cortex. *Cerebral Cortex* **18**:2855–2867.
- 989 Schecklmann M, Landgrebe M, Langguth B. 2014. Phenotypic characteristics of hyperacusis in tinnitus. *PLoS One*  
990 **9**:e86944. doi:10.1371/journal.pone.0086944
- 991 Schormans AL, Typlt M, Allman BL. 2018. Adult-onset hearing impairment induces layer-specific cortical  
992 reorganization: evidence of crossmodal plasticity and central gain enhancement. *Cerebral Cortex* **29**:1875–  
993 1888. doi:10.1093/cercor/bhy067



- 994 Schrode KM, Muniak MA, Kim Y-H, Lauer AM. 2018. Central Compensation in Auditory Brainstem after Damaging  
995 Noise Exposure. *eNeuro* **5**:ENEURO.0250-18.2018. doi:10.1523/ENEURO.0250-18.2018
- 996 Seki S, Eggermont JJ. 2003a. Changes in spontaneous firing rate and neural synchrony in cat primary auditory cortex  
997 after localized tone-induced hearing loss. *Hearing Research* **180**:28–38. doi:10.1016/S0378-5955(03)00074-1
- 998 Seki S, Eggermont JJ. 2003b. Changes in spontaneous firing rate and neural synchrony in cat primary auditory cortex  
999 after localized tone-induced hearing loss. *Hearing Research* **180**:28–38. doi:10.1016/S0378-5955(03)00074-1
- 1000 Shaheen LA, Liberman MC. 2018. Cochlear synaptopathy changes sound-evoked activity without changing  
1001 spontaneous discharge in the mouse inferior colliculus. *Frontiers in Systems Neuroscience* **12**:1–19.  
1002 doi:10.3389/fnsys.2018.00059
- 1003 Shargorodsky J, Curhan GC, Farwell WR. 2010. Prevalence and Characteristics of Tinnitus among US Adults. *The*  
1004 *American Journal of Medicine* **123**:711–718. doi:10.1016/j.amjmed.2010.02.015
- 1005 Sheintuch L, Rubin A, Brande-Eilat N, Geva N, Sadeh N, Pinchasof O, Ziv Y. 2017. Tracking the Same Neurons across  
1006 Multiple Days in Ca<sup>2+</sup> Imaging Data. *Cell Reports* **21**:1102–1115. doi:10.1016/j.celrep.2017.10.013
- 1007 Shore SE, Wu C. 2019. Mechanisms of noise-induced tinnitus: insights from cellular studies. *Neuron* **103**:8–20.  
1008 doi:10.1016/j.neuron.2019.05.008
- 1009 Strelcyk O, Dau T. 2009. Relations between frequency selectivity, temporal fine-structure processing, and speech  
1010 reception in impaired hearing. *The Journal of the Acoustical Society of America* **125**:3328–3328.  
1011 doi:10.1121/1.3097469
- 1012 Sturm JJ, Zhang-Hooks Y-X, Roos H, Nguyen T, Kandler K. 2017. Noise trauma induced behavioral gap detection  
1013 deficits correlate with reorganization of excitatory and inhibitory local circuits in the inferior colliculus and  
1014 are prevented by acoustic enrichment. *The Journal of Neuroscience* **37**:0602–17.  
1015 doi:10.1523/JNEUROSCI.0602-17.2017
- 1016 Sun W, Deng A, Jayaram A, Gibson B. 2012. Noise exposure enhances auditory cortex responses related to  
1017 hyperacusis behavior. *Brain Research* **1485**:108–116. doi:10.1016/j.brainres.2012.02.008
- 1018 Sun YJ, Wu GK, Liu B, Li P, Zhou M, Xiao Z, Tao HW, Zhang LI. 2011. Fine-tuning of pre-balanced excitation and  
1019 inhibition during auditory cortical development. *Nature* **465**:927–931.
- 1020 Syka J, Rybalko N, Popelář J. 1994. Enhancement of the auditory cortex evoked responses in awake guinea pigs after  
1021 noise exposure. *Hearing Research* **78**:158–168. doi:10.1016/0378-5955(94)90021-3
- 1022 Tan AYYYY, Atencio CAA, Polley DBB, Merzenich MMM, Schreiner CEE. 2007. Unbalanced synaptic inhibition can  
1023 create intensity-tuned auditory cortex neurons. *Neuroscience* **146**:449–462.  
1024 doi:10.1016/j.neuroscience.2007.01.019
- 1025 Teichert M, Liebmann L, Hübner CA, Bolz J. 2017. Homeostatic plasticity and synaptic scaling in the adult mouse  
1026 auditory cortex. *Scientific Reports* **7**:17423. doi:10.1038/s41598-017-17711-5
- 1027 Turrigiano G. 2012. Homeostatic synaptic plasticity: local and global mechanisms for stabilizing neuronal function.  
1028 *Cold Spring Harbor Perspectives in Biology* **4**:a005736–a005736.
- 1029 Turrigiano GG. 2008. The Self-Tuning Neuron: Synaptic Scaling of Excitatory Synapses. *Cell* **135**:422–435.  
1030 doi:10.1016/j.cell.2008.10.008
- 1031 Vaden KI, Matthews LJ, Eckert MA, Dubno JR. 2017. Longitudinal Changes in Audiometric Phenotypes of Age-Related  
1032 Hearing Loss. *Jaro-Journal of the Association for Research in Otolaryngology* **18**:371–385.  
1033 doi:10.1007/s10162-016-0596-2
- 1034 Wake M, Takeno S, Ibrahim D, Harrison R, Mount R. 1993. Carboplatin ototoxicity: an animal model. *The Journal of*  
1035 *laryngology and otology* **107**:585–589. doi:10.1017/S0022215100123771
- 1036 Wang W, Deng D, Jenkins K, Zinsmaier AK, Zhou Q, Bao S. 2022. Correlation of Electrophysiological and Gene  
1037 Transcriptional Dysfunctions in Single Cortical Parvalbumin Neurons After Noise Trauma. *Neuroscience*  
1038 **482**:87–99. doi:10.1016/j.neuroscience.2021.12.006
- 1039 Wu C, Martel DT, Shore SE. 2016. Increased synchrony and bursting of dorsal cochlear nucleus fusiform cells correlate  
1040 with tinnitus. *Journal of Neuroscience* **36**:2068–2073.
- 1041 Wu GK, Li P, Tao HW, Zhang LI. 2006. Nonmonotonic synaptic excitation and imbalanced inhibition underlying cortical  
1042 intensity tuning. *Neuron* **52**:705–715.
- 1043 Yang S, Su W, Bao S. 2012. Long-term, but not transient, threshold shifts alter the morphology and increase the  
1044 excitability of cortical pyramidal neurons. *Journal of neurophysiology* **108**:1567–1574.  
1045 doi:10.1152/jn.00371.2012

- 1046 Yang S., Weiner BD, Zhang LS, Cho S-J, Bao S. 2011. Homeostatic plasticity drives tinnitus perception in an animal  
1047 model. *Proceedings of the National Academy of Sciences* **108**:14974–14979. doi:10.1073/pnas.1107998108  
1048 Yang Sungchil, Weiner BD, Zhang LS, Cho S-JS-J, Bao S. 2011. Homeostatic plasticity drives tinnitus perception in an  
1049 animal model. *Proceedings of the National Academy of Sciences* **108**:14974–14979.  
1050 doi:10.1073/pnas.1107998108  
1051 Yunus MB. 2007. Fibromyalgia and Overlapping Disorders: The Unifying Concept of Central Sensitivity Syndromes.  
1052 *Seminars in Arthritis and Rheumatism* **36**:339–356. doi:10.1016/j.semarthrit.2006.12.009  
1053 Zeng FG. 2020. Tinnitus and hyperacusis: central noise, gain and variance. *Current Opinion in Physiology* **18**:123–129.  
1054 doi:10.1016/j.cophys.2020.10.009  
1055 Zeng FG. 2013. An active loudness model suggesting tinnitus as increased central noise and hyperacusis as increased  
1056 nonlinear gain. *Hearing Research* **295**:172–179. doi:10.1016/j.heares.2012.05.009  
1057  
1058  
1059  
1060  
1061  
1062  
1063  
1064  
1065  
1066  
1067  
1068  
1069  
1070  
1071  
1072  
1073  
1074  
1075  
1076  
1077  
1078  
1079  
1080  
1081  
1082  
1083  
1084  
1085  
1086  
1087  
1088  
1089  
1090  
1091  
1092  
1093  
1094  
1095  
1096

1097

## FIGURES & LEGENDS

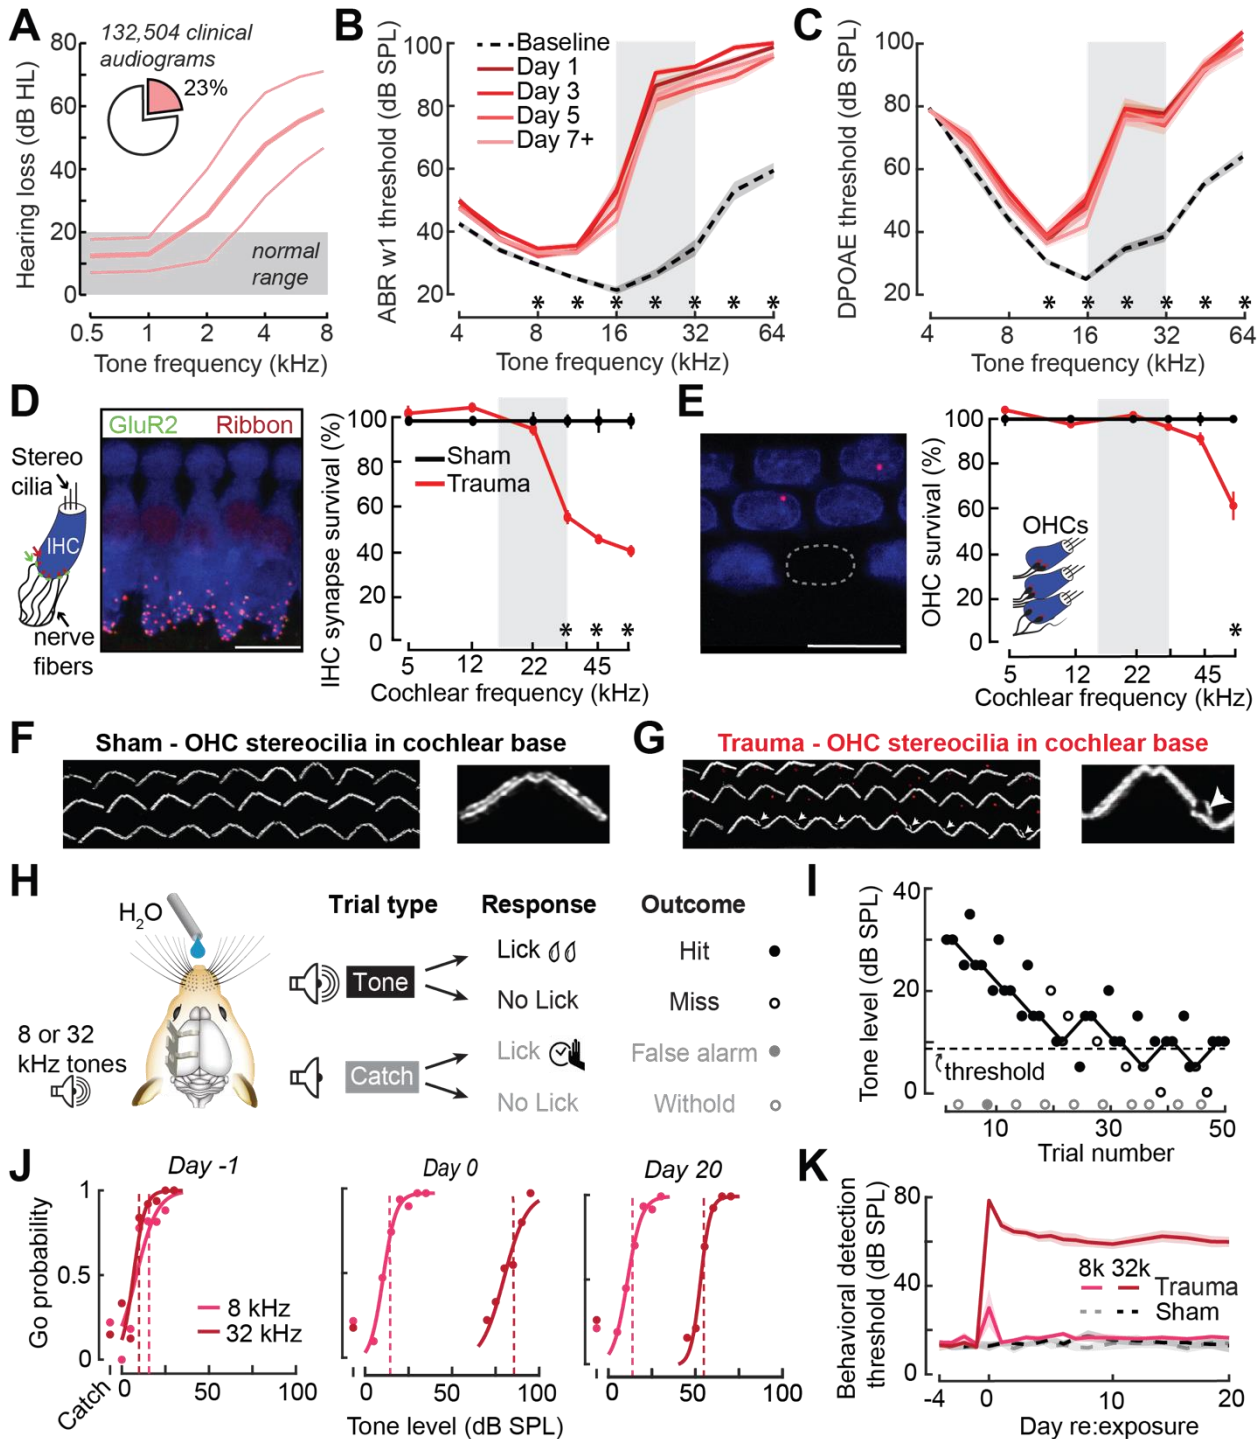

### FIGURE 1. Electrophysiological, anatomical, and behavioral confirmation of noise-induced, high-frequency sensorineural hearing loss.

(A) In human subjects, analysis of 132,504 pure tone audiograms indicate that 23% of visitors to our audiology clinic present with steeply sloping high-frequency hearing loss. Values represent mean  $\pm$  SD hearing thresholds in units of dB hearing loss (HL).

(B-C) In mice, response thresholds for wave 1 of the auditory brainstem response (ABR, B) and cochlear DPOAE (C) measured before and at various timepoints after acoustic trauma show a permanent threshold shift at high frequencies (2-way repeated measures ANOVAs, Frequency  $\times$  Time interaction terms for ABR wave 1 [ $F = 87.51$ ,  $p = 6 \times 10^{-26}$ ] and DPOAE [ $F = 46.44$ ,  $p = 2 \times 10^{-29}$ ]). Asterisks denote significant differences between baseline and Day 7+ measurements with post-hoc pairwise comparisons ( $p < 0.05$ ).

1098

1099

1100

1101

1102

1103

1104

1105

1106

1107

1108

1109

1110 **(D)** Cochlea immunostained for anti-CtBP2 and anti-GluR2a reveal reduced presynaptic ribbon and post-  
1111 synaptic glutamate receptor patches, respectively, at high-frequency regions of the cochlea (>22 kHz) in  
1112 trauma mice compared to sham exposure controls (Mixed model ANOVA with Group as a factor, Frequency  
1113 as a repeated measure, and cochlear synapse count as the outcome measure: Group  $\times$  Frequency  
1114 interaction term,  $F = 22.33$ ,  $p = 4 \times 10^{-11}$ ). Asterisks denote significant differences between Sham and  
1115 Trauma with post-hoc pairwise comparisons ( $p < 0.05$ ).

1116 **(E)** Loss of outer hair cell (OHC) bodies is limited to the extreme basal regions of the cochlea in noise-  
1117 exposed animals (Group  $\times$  Frequency interaction term,  $F = 11.54$ ,  $p = 4 \times 10^{-7}$ ).

1118 **(F-G)** Anatomical substrates for cochlear threshold shifts (*B and C*) in more apical cochlear regions can be  
1119 linked to comparatively subtle OHC stereocilia damage, as visualized by anti-Espin immunolabeling of actin  
1120 bundle proteins. Cochlear location is approximately 32 kHz. Scale bars represent 10  $\mu\text{m}$ .

1121 **(H)** Schematic depicts the design of a head-fixed Go/NoGo tone detection task.

1122 **(I)** A modified 2-up, 1-down adaptive staircasing approach to study tone detection thresholds. Example data  
1123 shows one run of 8 kHz tone detection, which finishes at 6 reversals.

1124 **(J)** Logistical fits of 8- and 32-kHz Go probability functions for one mouse measured before, hours after, and  
1125 20 days following acoustic trauma. Dotted lines show threshold as determined by the adaptive tracking  
1126 method.

1127 **(K)** Daily behavioral threshold measurements from 13 mice ( $N = 7$  trauma) over an approximate 3-week  
1128 time period shows a permanent increase in 32 kHz threshold but not 8 kHz after acoustic trauma (Mixed  
1129 model ANOVA with Group as a factor and both Frequency and Time as repeated measures, main effects  
1130 for Group [ $F = 157.76$ ,  $p = 8 \times 10^{-8}$ ], Frequency [ $F = 368.87$ ,  $p = 9 \times 10^{-10}$ ], and Time [ $F = 44.21$ ,  $p = 6 \times$   
1131  $10^{-53}$ ], Group  $\times$  Frequency  $\times$  Time interaction [ $F = 37.98$ ,  $p = 2 \times 10^{-48}$ ].

1132  
1133  
1134  
1135  
1136  
1137  
1138  
1139  
1140  
1141  
1142  
1143  
1144  
1145  
1146  
1147  
1148  
1149  
1150

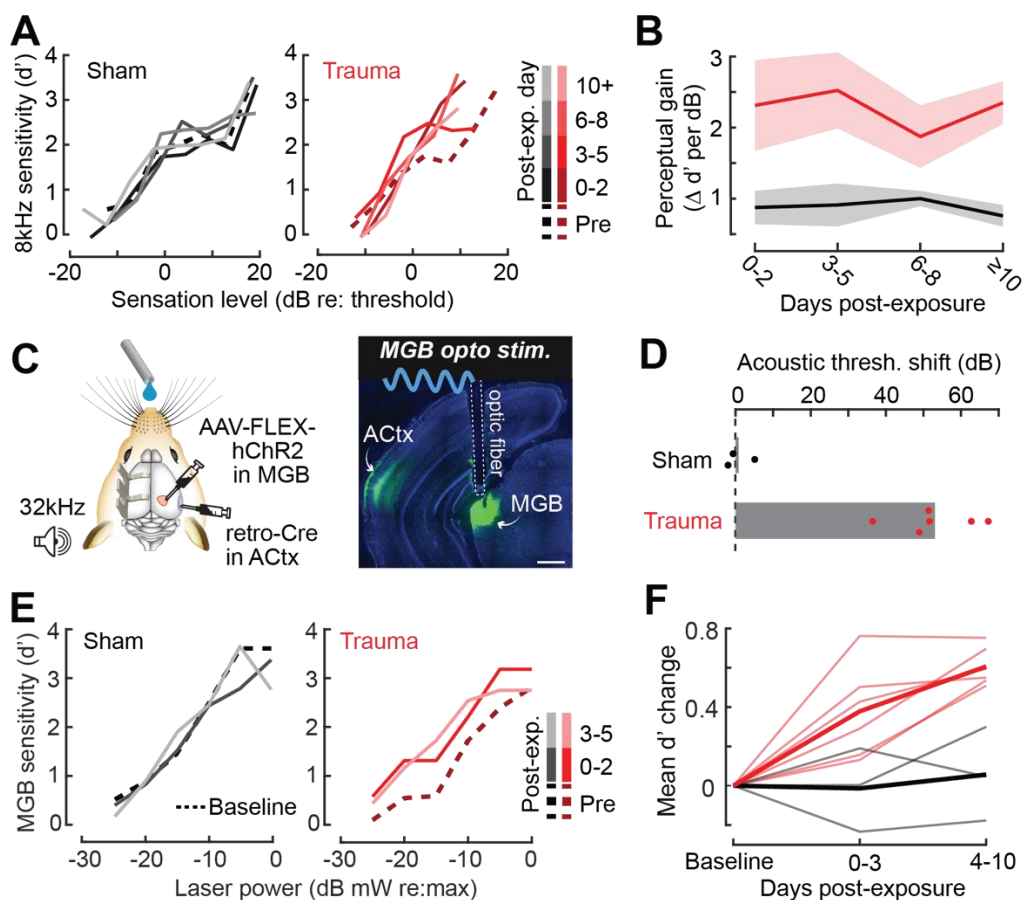

**FIGURE 2. Hypersensitivity to sound and direct auditory thalamocortical stimulation following acoustic trauma.**

**(A)** Behavioral detection functions (reported as the sensitivity index,  $d'$ ) across time for sham- and noise-exposed example mice show hypersensitivity to spared, low-frequency tones.

**(B)** Change in perceptual gain for the 8 kHz tone, measured as the mean increase in  $d'$  per dB increase in sound level, relative to baseline performance. Perceptual gain for an 8kHz tone is increased in acoustic trauma mice (N = 7) compared to sham (N = 6) but does not change over post-exposure time (ANOVA with Group as a factor and Time as a repeated measure, main effect for Group,  $F = 12.42$ ,  $p = 0.005$ ; main effect for Time,  $F = 0.52$ ,  $p = 0.67$ ).

**(C)** *Left*, Preparation for the mixed modality optogenetic and tone detection task. *Right*, ChR2 expression in auditory thalamocortical neurons and placement of the implanted optic fiber relative to retrogradely labeled cell bodies in the medial geniculate body (MGB).

**(D)** During 32kHz tone detection blocks, detection thresholds are elevated by approximately 50 dB following trauma (N=6, paired t-test,  $p = 0.0001$ ) but no change was noted in sham-exposed mice (N=3,  $p = 0.74$ ).

**(E)** Psychometric detection functions for optogenetic auditory thalamocortical stimulation before and after acoustic trauma or sham exposure in two example mice.

**(F)** Summed change across the  $d'$  function relative to baseline, for noise- and sham-exposed mice. Individual mice thin lines, group mean thick lines. After trauma, mice became hypersensitive to MGB stimulation, suggesting an auditory thalamocortical contribution to perceptual hypersensitivity (ANOVA with Group as a factor and post-exposure Time as a repeated measure; main effect for Group,  $F = 15.54$ ,  $p = 0.006$ ; main effect for time,  $F = 4.65$ ,  $p = 0.07$ ).



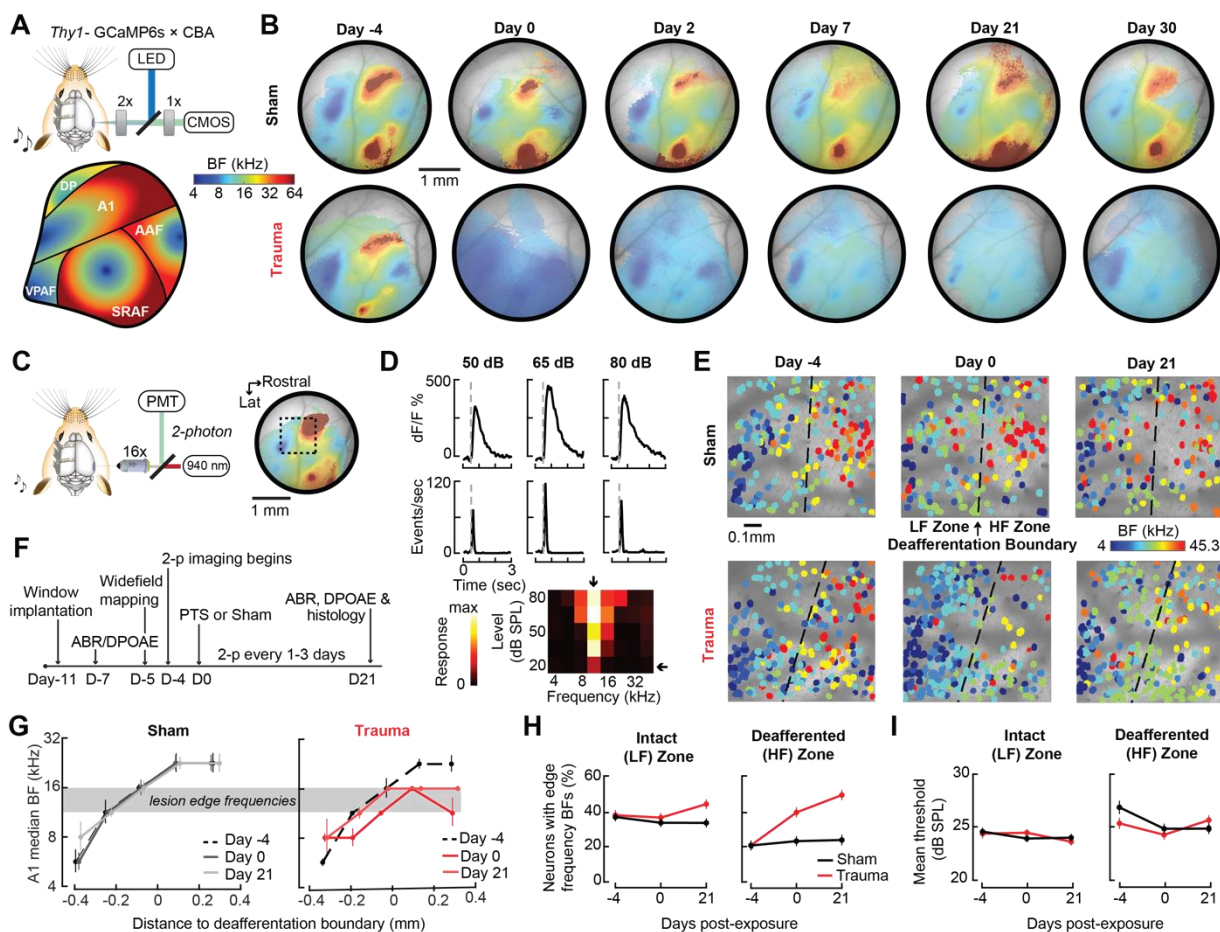

### FIGURE 3. Tonotopic remapping within the cortical deafferentation zone revealed by chronic mesoscale and cellular calcium imaging

(A) *Top*, Approach for widefield calcium imaging using a tandem lens epifluorescence microscope in awake Thy1-GCaMP6s x CBA/CaJ mice that express GCaMP6s in pyramidal neurons (PyrNs). *Bottom*, Schematic depicts the typical arrangement of individual fields within the ACtx based on tonotopic BF gradients (as detailed in Romero et al., 2019).

(B) Chronic widefield best frequency (BF) maps in example sham and trauma mice (top and bottom, respectively) shows BF remapping within the deafferented high-frequency regions throughout the ACtx after acoustic trauma.

(C) *Left*, approach for chronic 2-photon calcium imaging of layer 2/3 PyrN's along the A1 tonotopic gradient. *Right*, 2-photon imaging field of view superimposed on the widefield BF map measured in another example mouse.

(D) *Top*, Example of tone-evoked GCaMP transients measured as the fractional change in fluorescence and deconvolved activity. *Bottom*, Peak deconvolved amplitudes for tones of varying frequencies and levels are used to populate the complete frequency-response area and derive the BF (downward arrow) and threshold (leftward arrow) for each neuron.

(E) BF arrangements in L2/3 PyrNs measured at three times over the course of a month in representative sham and trauma mice. A support vector machine (SVM) was trained to bisect the low- and high-frequency zones of the A1 BF map (LF [ $< 16$  kHz] and HF [ $\geq 16$  kHz], respectively). The dashed line represents the SVM-derived boundary to segregate the LF and HF. The SVM line is determined for each mouse on Day -4 and then applied to the same physical location for all future imaging sessions following alignment.

(F) Timeline for chronic 2-photon imaging and cochlear function testing in each sham and trauma mouse.

(G) Individual PyrNs are placed into five distance categories based on their Euclidean distance to the SVM line and the BF of each category is expressed as the median  $\pm$  bootstrapped error. Following trauma, BFs in the HF zone are remapped to sound frequencies at the edge of the cochlear lesion.

(H) Across all tone-responsive PyrNs measured at three time points, the percent of neurons with BFs corresponding to edge frequencies (11.3-16kHz) was greater in trauma mice (N = 4 mice, n = 1749 PyrNs)

1203 than sham (N = 4 mice, n = 1748 PyrNs), was greater in the deafferented HF region than the intact LF  
1204 region, and increased over time in trauma mice compared to sham controls (3-way ANOVA with Group,  
1205 Region, and Time as factors: main effect for Group,  $F = 34.29$ ,  $p = 5 \times 10^{-9}$ ; Group  $\times$  Region interaction term,  
1206  $F = 7.42$ ,  $p = 0.007$ ; Group  $\times$  Time interaction term,  $F = 10.17$ ,  $p = 0.00004$ ).

1207 **(I)** Competitive expansion of edge frequency BFs in the deafferented HF zone was not accompanied by a  
1208 change in neural response threshold (3-way ANOVA: main effect for Group,  $F = 0.8$ ,  $p = 0.37$ ; Group  $\times$   
1209 Region interaction term,  $F = 0.93$ ,  $p = 0.33$ ; Group  $\times$  Time interaction term,  $F = 1.33$ ,  $p = 0.27$ ).

1210  
1211  
1212  
1213  
1214  
1215  
1216  
1217  
1218  
1219  
1220  
1221  
1222  
1223  
1224  
1225  
1226  
1227  
1228  
1229  
1230  
1231  
1232  
1233  
1234  
1235  
1236  
1237  
1238  
1239  
1240  
1241  
1242  
1243  
1244



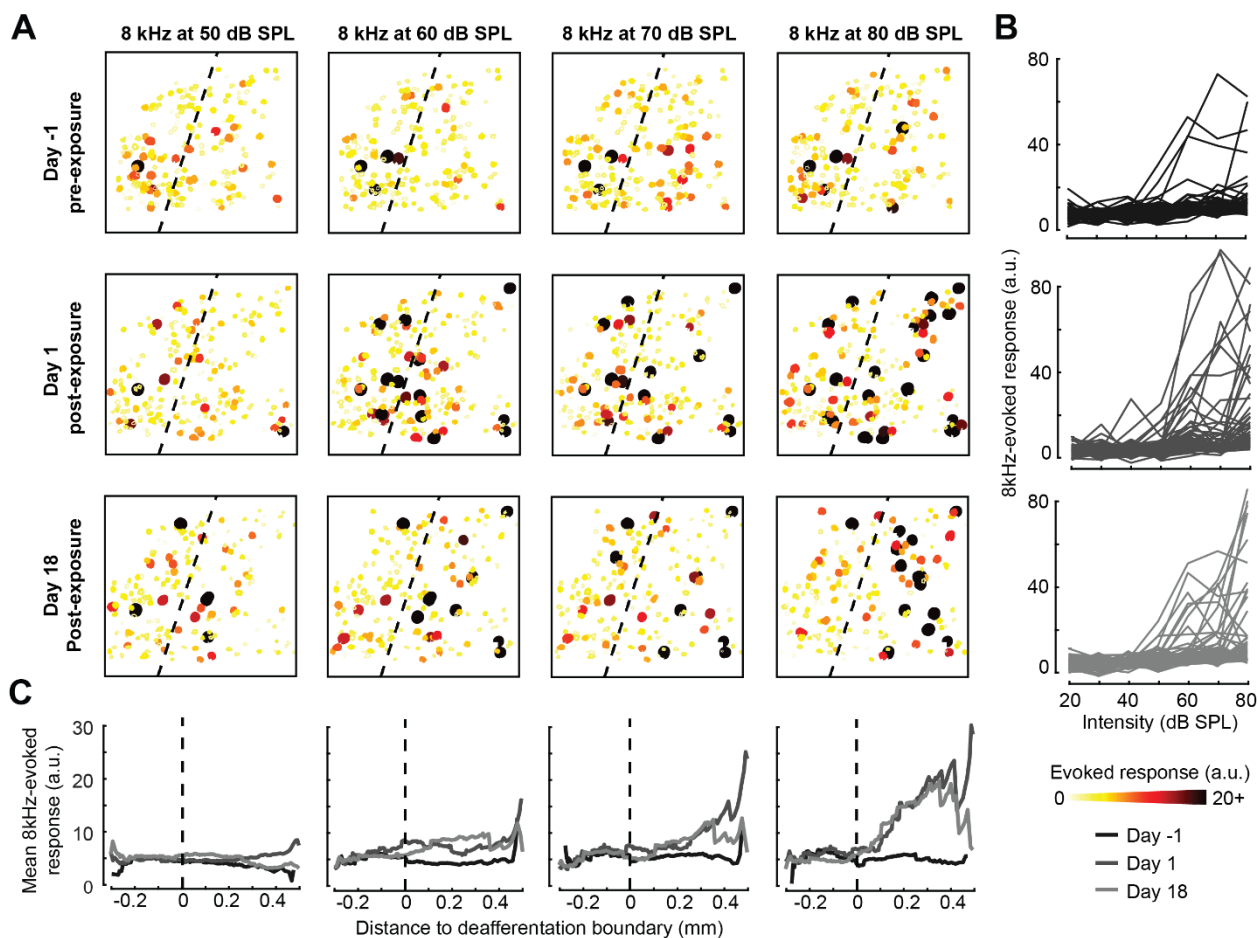

**FIGURE 4. Spatial and temporal expression of excess central gain following acoustic trauma.**

**(A)** Response amplitudes to 8 kHz tones presented at varying levels (columns) and days (rows) relative to noise exposure for 185 PyrNs in an example mouse.

**(B)** Intensity-response functions for 66 randomly selected PyrNs recorded on days -4, 1, and 18 relative to the day of noise exposure.

**(C)** Mean tone-evoked responses for all PyrNs relative to the SVM deafferentation boundary at 50-80 dB SPL plotted separately for each of the three days.

1245  
1246  
1247  
1248  
1249  
1250  
1251  
1252  
1253  
1254  
1255  
1256  
1257  
1258  
1259  
1260  
1261  
1262  
1263  
1264  
1265  
1266  
1267

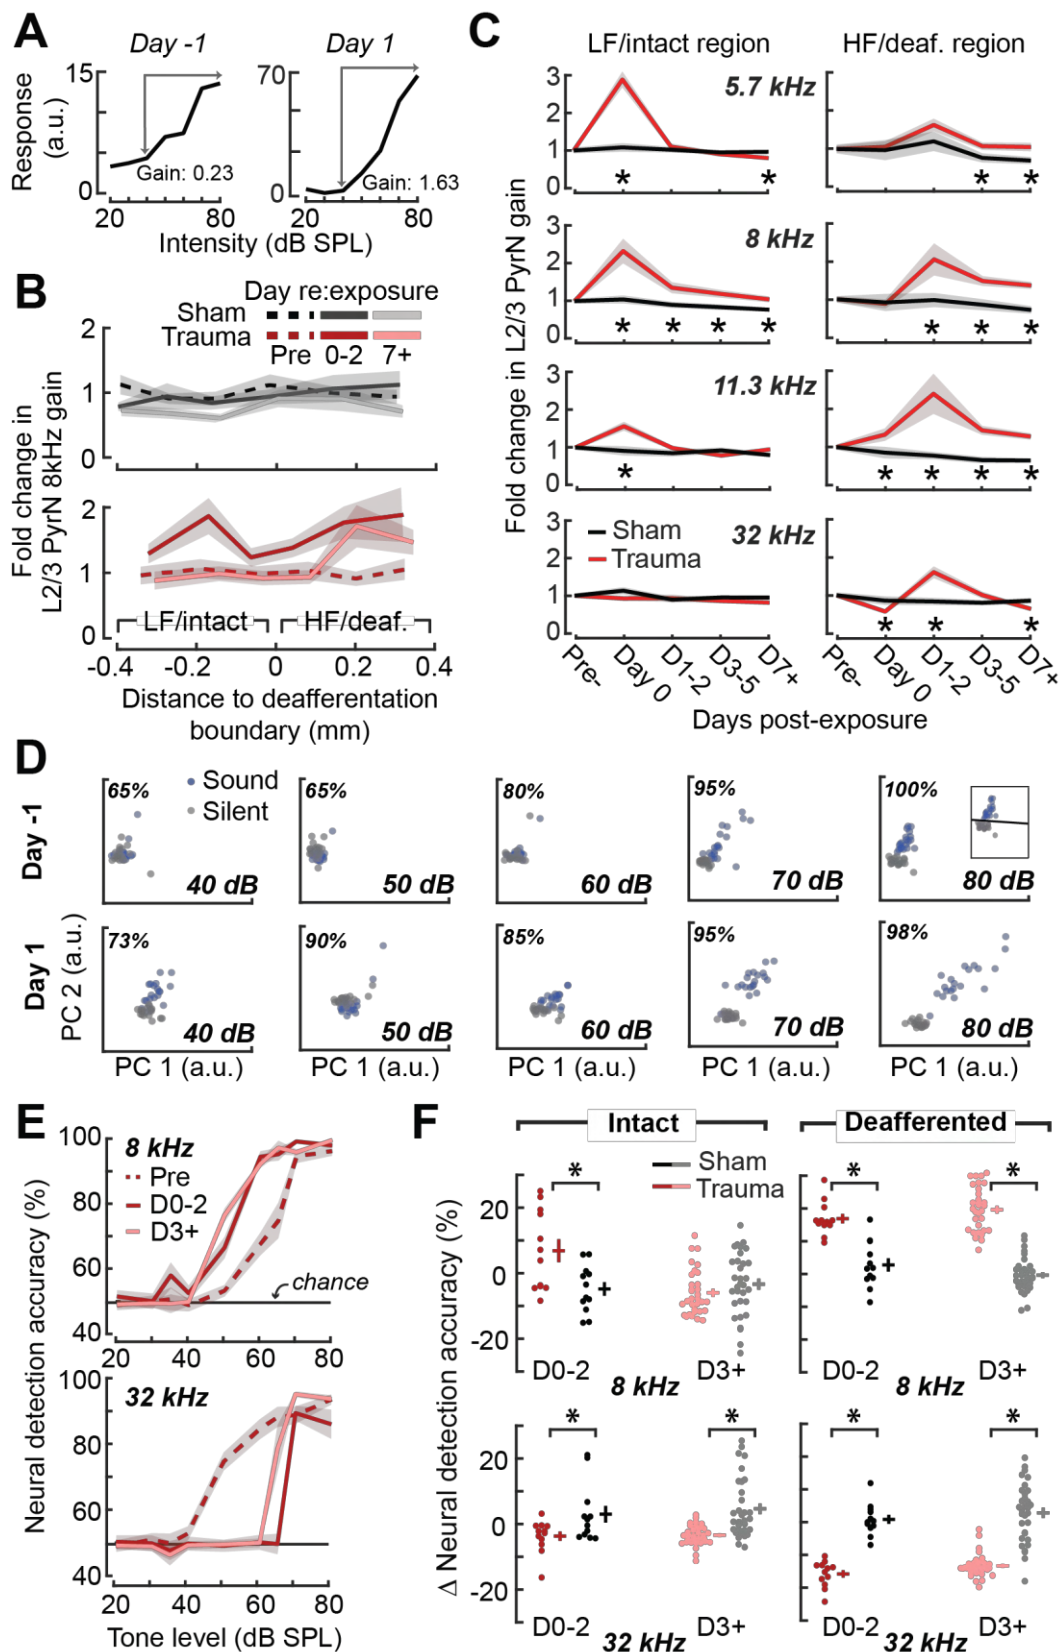

**FIGURE 5. Increased central gain is associated with hypersensitive neural encoding of low-intensity sounds.**

(A) Neural gain is measured as the average rate of response growth in the sound level-response function. A detailed description of how neural gain is measured for different types of level-response functions is provided in **Figure 5 – Figure supplement 1**.

1268  
1269  
1270  
1271  
1272  
1273

1274 **(B)** Mean change in response gain to an 8 kHz tone relative to the baseline SVM demarcation of the low-  
1275 frequency (LF) intact and high-frequency (HF) deafferented regions of the A1 map from all sham-exposed  
1276 (*top*) and all noise-exposed (*bottom*) mice.

1277 **(C)** Fold change in 8 kHz response gain relative to the pre-exposure period in sham (n = 23,007 PyrNs from  
1278 4 mice) and trauma (n = 23,319 PyrNs from 4 mice). After acoustic trauma, the response gain for low-  
1279 frequency tones is temporarily increased in the intact region. A sustained increase in response gain is  
1280 observed in the deafferented region, particularly for tone frequencies bordering the cochlear lesion. Four-  
1281 way ANOVA with Group, Region, Time, and Frequency as factors (main effects, respectively: F = 111.03, p  
1282 =  $6 \times 10^{-26}$ ; F = 0.03, p = 0.87; F = 23.21, p =  $4 \times 10^{-19}$ ; F = 9.87, p =  $2 \times 10^{-6}$ ; Group x Region x Time x  
1283 Frequency interaction term: F=2.23; p = 0.008. Asterisks denote significant pairwise post-hoc differences  
1284 between groups (p < 0.05).

1285 **(D)** Neural ensemble responses to single trials of sound or silence were decomposed into principal  
1286 components (PC) and classified with an SVM decoder. The first two PCs are presented from an example  
1287 mouse 1 day before or after acoustic trauma for an 8 kHz tone. Single trial classification accuracy is  
1288 provided for each sound intensity.

1289 **(E)** Mean decoding accuracy for 8 and 32 kHz tones across all noise-exposed mice as a function of sound  
1290 intensity at varying times following acoustic trauma.

1291 **(F)** Mean change in decoding accuracy across all intensities for 8 and 32 kHz tones for L2/3 PyrNs in the  
1292 intact and deafferented regions of the A1 map. For 8 kHz tones, PyrN ensemble decoding shows sustained  
1293 improvement in the deafferented region but a temporary improvement in the intact region. Ensemble  
1294 decoding of 32 kHz tones is reduced for all time points and measurement regions. Dots represent single  
1295 imaging sessions. Bars denote mean  $\pm$  SEM. Asterisks represent significant differences with unpaired t-  
1296 tests (p < 0.05).

1297  
1298  
1299  
1300  
1301  
1302  
1303  
1304  
1305  
1306

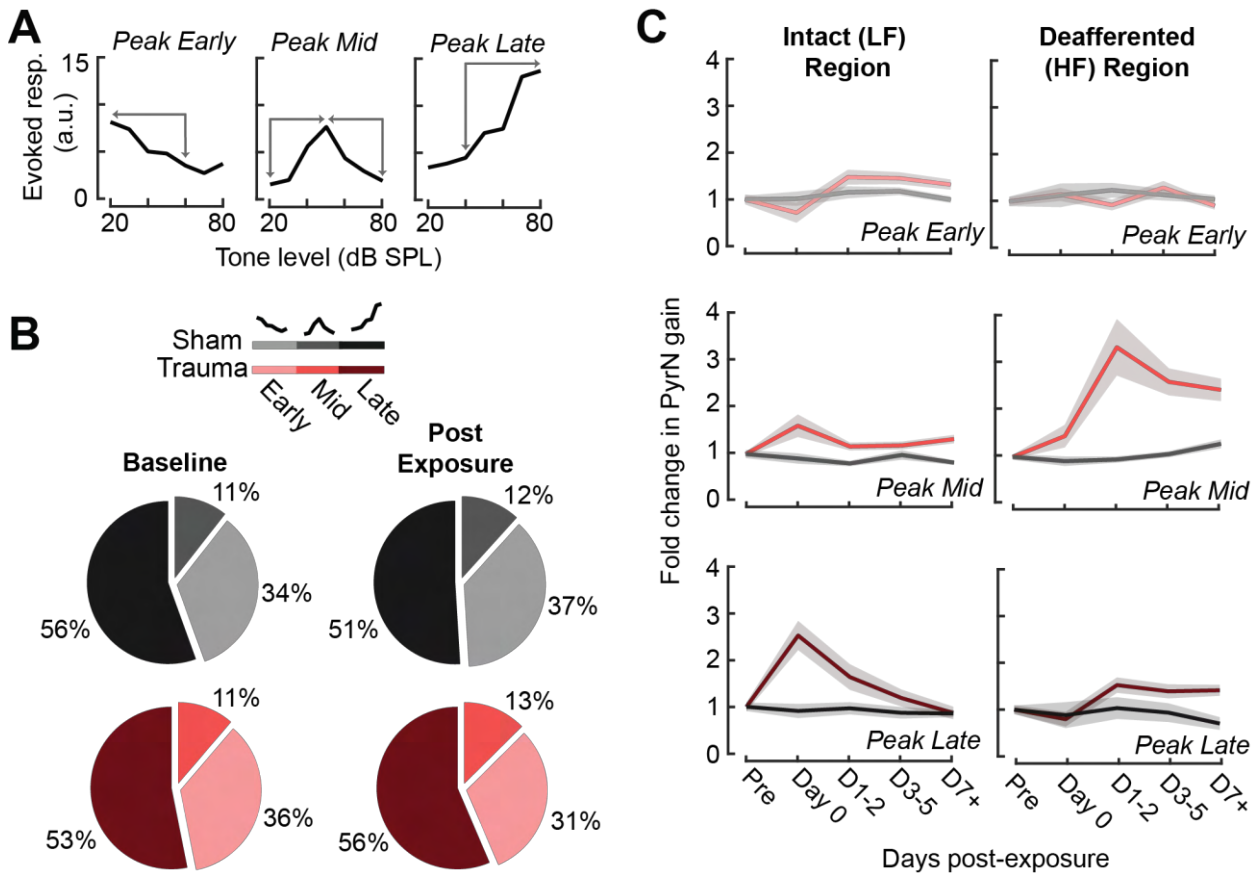

**Figure 5 – figure supplement 1. Assessment of gain measurement for different intensity-response function shapes.**

(A) Tone-responsive neurons were assigned to one of three categories depending on the location of the intensity-response function peak (i.e., the best level). The gain was calculated as the absolute change in response over the intensity range(s) indicated by the arrows.

(B) The prevalence of the different function shapes for both noise- and sham-exposed mice at baseline and post-exposure D1-3.

(C) Rather than collapsing gain changes across response function types (as per **Figure 5C**), analyzing each response type individually reveals that excess central gain is not observed in Peak Early types and is expressed most strongly in the Peak Mid intensity response growth functions.

1307  
1308  
1309  
1310  
1311  
1312  
1313  
1314  
1315  
1316  
1317  
1318  
1319  
1320  
1321  
1322  
1323  
1324  
1325  
1326  
1327  
1328  
1329

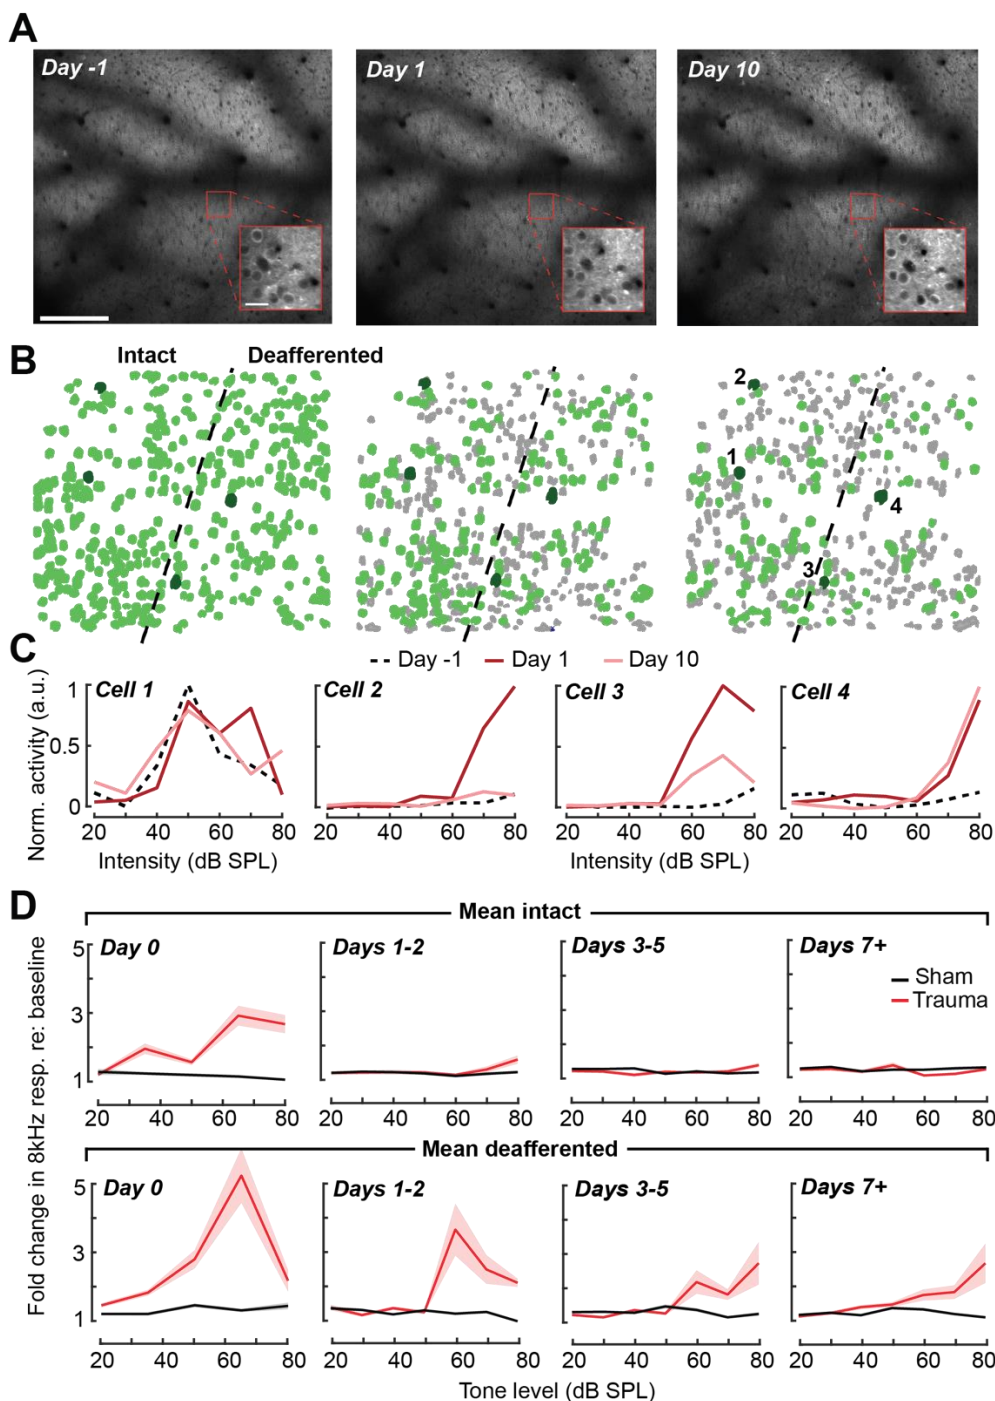

**FIGURE 6. Tracking single neuron response gain dynamics over a several week period before and after noise exposure.**

(A) Example fields-of-view from a single mouse showing the same imaging field over a several week period. Insets show data acquired at 4× digital zoom. Scale bar is 200 μm, inset scale bar is 20 μm.

(B) Single L2/3 PyrN ROI masks. Green masks indicate cells found on the current day and all previous days using a cell score threshold of 0.8 (see **Figure 6 – Figure supplement 1**).

(C) Normalized 8 kHz intensity-response functions for the four PyrNs highlighted in *B*. Neurons in the intact region show temporary increases in their responses while neurons in the deafferented region show permanent hyperresponsiveness.

(D) Mean fold change in response to 8 kHz tones of varying intensities for individual neurons relative to their own response function measured prior to noise exposure (n = 303/552, trauma/sham). Gain is strongly elevated in both regions hours after trauma. Sustained gain increases are observed in the deafferented zone for at least one week following trauma but not in the intact zone. Four-way ANOVA with Group and Region as factors, and Time and Intensity as repeated measures (main effects, respectively: F = 6.87, p =



1345 0.01;  $F = 2.9$ ,  $p = 0.09$ ;  $F = 8.69$ ,  $p = 4 \times 10^{-5}$ ;  $F = 116.61$ ,  $p = 8 \times 10^{-13}$ ; Group  $\times$  Region  $\times$  Time  $\times$  Intensity  
 1346 interaction term:  $F = 6.65$ ;  $p = 0.0004$ ).

1347  
 1348  
 1349  
 1350

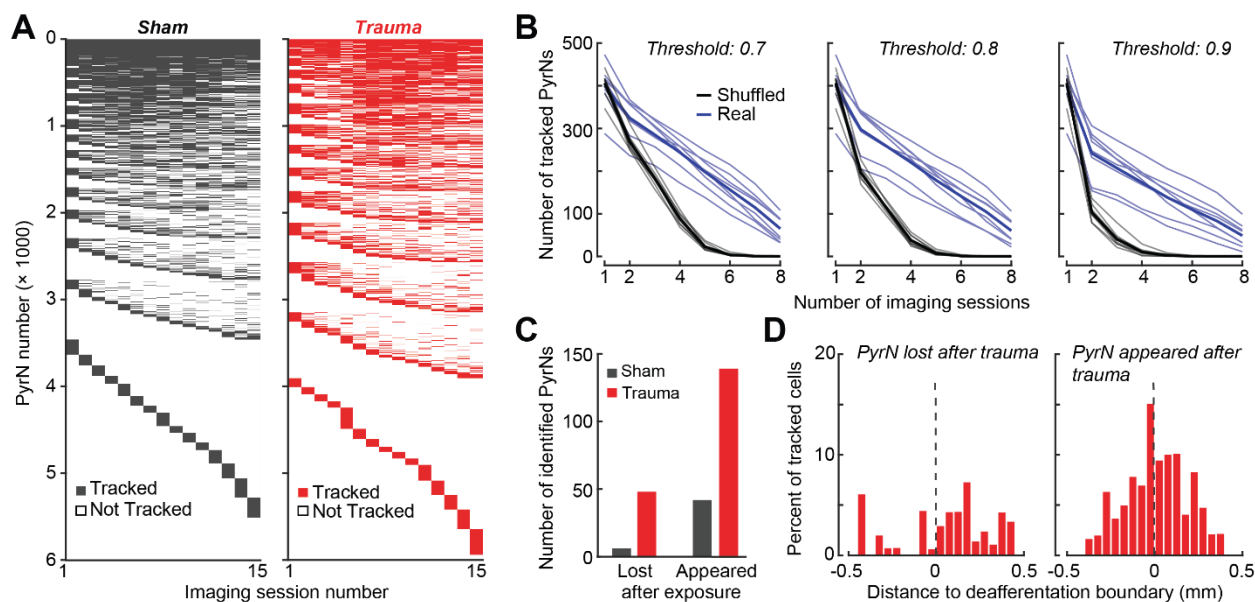

1351  
 1352

**Figure 6 – Figure supplement 1. Validation of single cell tracking over imaging days.**

**(A)** Representation of all neurons found across noise- and sham-exposed mice. Cells are initially sorted by both the number of sessions they were tracked (descending order) and then by the first session they were identified (ascending order).

**(B)** To set criteria for identifying chronically tracked cells, we performed the same tracking algorithm on shuffled fields-of-view taken from the eight different mice. We've plotted the number cells tracked across 8 sessions in real and shuffled data sets for different confidence thresholds. Falsely tracked PyrNs were not observed at a confidence threshold of 0.8 at 8 sessions

**(C)** Cells reliably tracked for multiple baseline sessions that disappeared after noise exposure were labeled 'lost', while cells not present at baseline that were subsequently identified and tracked for many sessions after noise exposure were labelled 'appeared'.

**(D)** After trauma, the location of the 'lost' and 'appeared' cells in the cortical map relative to the total number of cells found at each location and expressed as a percentage. Lost cells were largely found in the deafferented (high frequency) region, while appeared cells were concentrated around the deafferentation boundary.

1368

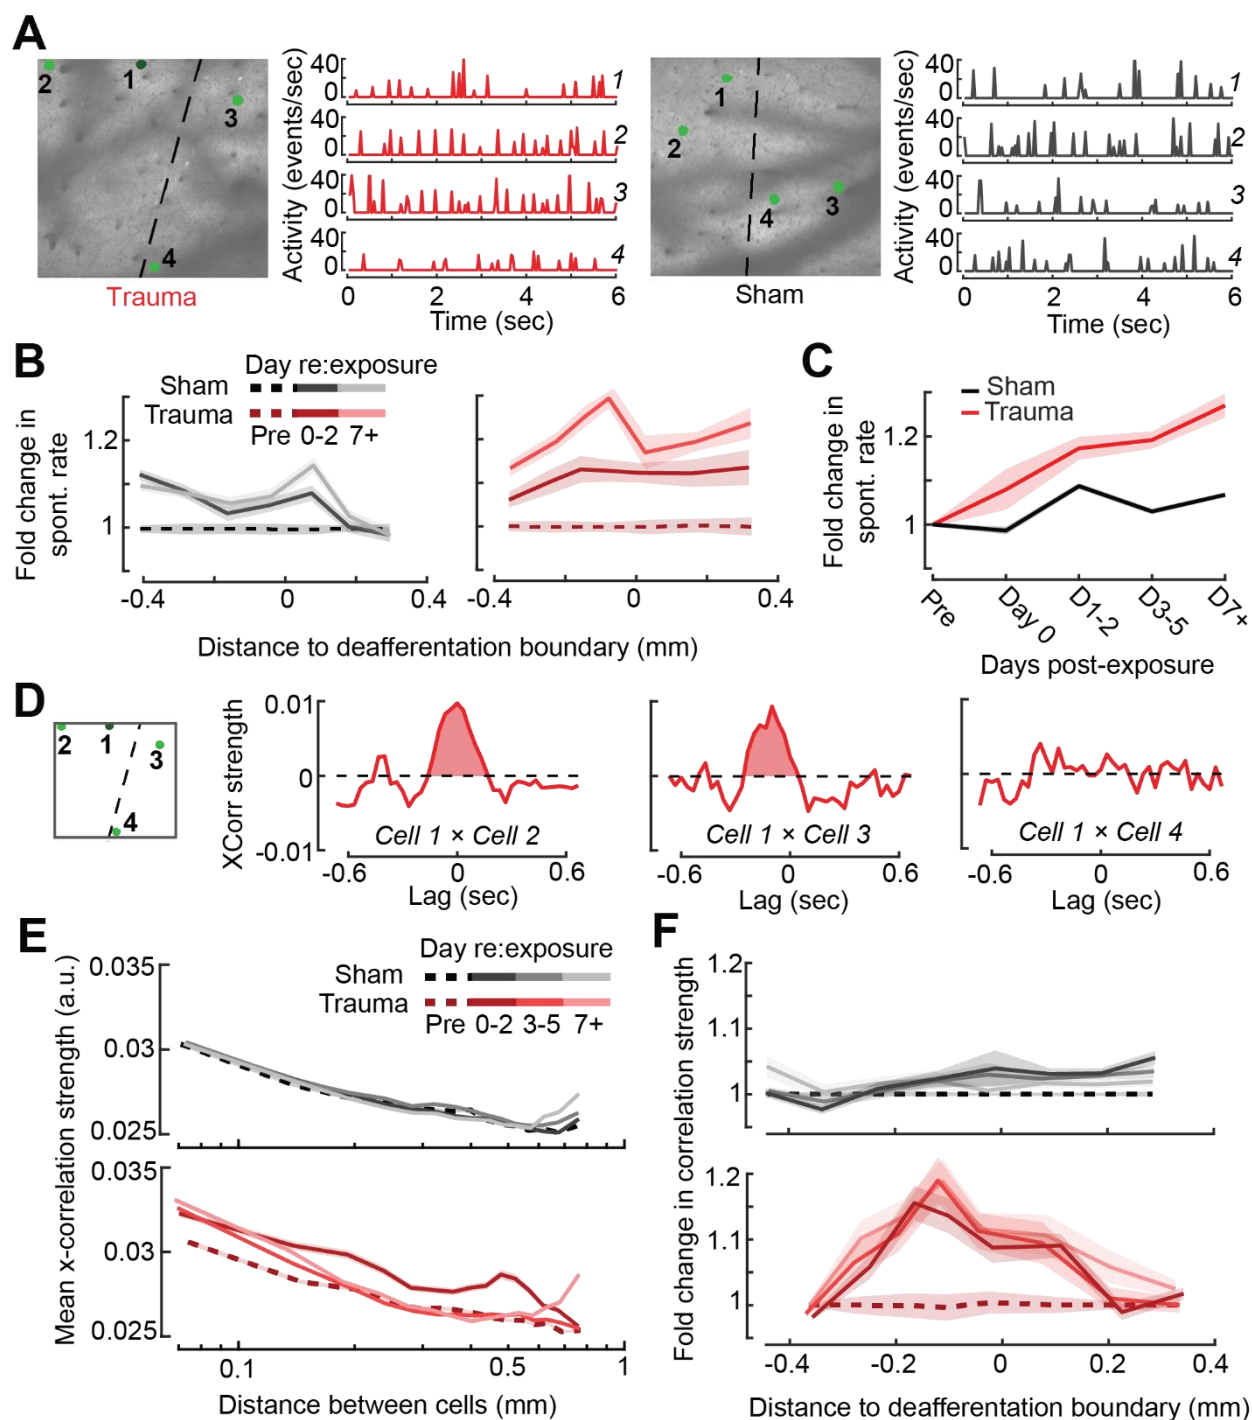

**FIGURE 7. Topographic regulation of neural hyperexcitability and hyper-synchrony after acoustic trauma.**

**(A)** Spontaneous activity traces in four example neurons from a trauma (*left*) and sham (*right*) mouse.  
**(B)** In chronically tracked PyrNs, spontaneous activity changes are expressed as fold change relative to that cell's pre-exposure baseline. Increased spontaneous activity after trauma (*right*) or the lack thereof after sham exposure (*left*) are plotted over topographic distance and over post-exposure time.

**(C)** Spontaneous activity changes across the cortical map are significantly greater after trauma than sham exposure and increase over post-exposure time (n = 915/1125 tracked cells, for trauma/sham; Mixed model ANOVA with Group as a factor and Time as a repeated measure, main effect for Group [F = 12.81, p = 0.0004], main effect for Time [F = 65.03, p = 3 × 10<sup>-40</sup>], Group × Time interaction term [F = 17.66, p = 3 × 10<sup>-11</sup>]).

1382 **(D)** Synchrony in the spontaneous activity of PyrN pairs is measured as the area under the shuffle-corrected  
1383 cross-correlogram peak (shaded red region, see **Methods**). Example data are plotted for the same four  
1384 PyrNs with topographic positions indicated in left panel.

1385 **(E)** Looking across all significantly correlated PyrN pairs recorded in a given imaging session ( $n = 3,301,363$   
1386 pairs, 1,624,195/1,677,168 for trauma/sham), neural synchrony is reduced as the physical separation  
1387 between somatic ROIs increases. Synchrony is increased after trauma, though remains elevated only  
1388 among nearby PyrNs (3-way ANOVA with Group, Day, and Distance as factors: main effects for Group [ $F =$   
1389  $556.94$ ,  $p = 4 \times 10^{-123}$ ], Day [ $F = 82.6$ ,  $p = 2 \times 10^{-53}$ ], and Distance [ $F = 8527.73$ ,  $p = 0$ ], Group  $\times$  Day  $\times$   
1390 Distance interaction term [ $F = 7.94$ ,  $p = 3 \times 10^{-5}$ ]).

1391 **(F)** For each chronically tracked neuron (same sample as C), we calculate their average neural synchrony  
1392 with all other cells (only taking significant pairs). Given the location of these tracked cells, we can examine  
1393 the fold change in neural synchrony relative to pre-exposure baseline across the topographic map. Neural  
1394 synchrony is significantly and stably increased after trauma, particularly for PyrNs located near the  
1395 deafferentation boundary (Mixed model ANOVA with Group and Distance as factors and Day as a repeated  
1396 measure: main effects for Group [ $F = 26.62$ ,  $p = 3 \times 10^{-7}$ ], Day [ $F = 1.68$ ,  $p = 0.19$ ], and Distance [ $F = 0.53$ ,  
1397  $p = 0.47$ ], Group  $\times$  Distance interaction term [ $F = 5.53$ ,  $p = 0.02$ ]).

1398  
1399  
1400  
1401  
1402  
1403  
1404  
1405  
1406  
1407  
1408  
1409  
1410  
1411  
1412  
1413  
1414  
1415  
1416  
1417  
1418  
1419  
1420  
1421  
1422  
1423

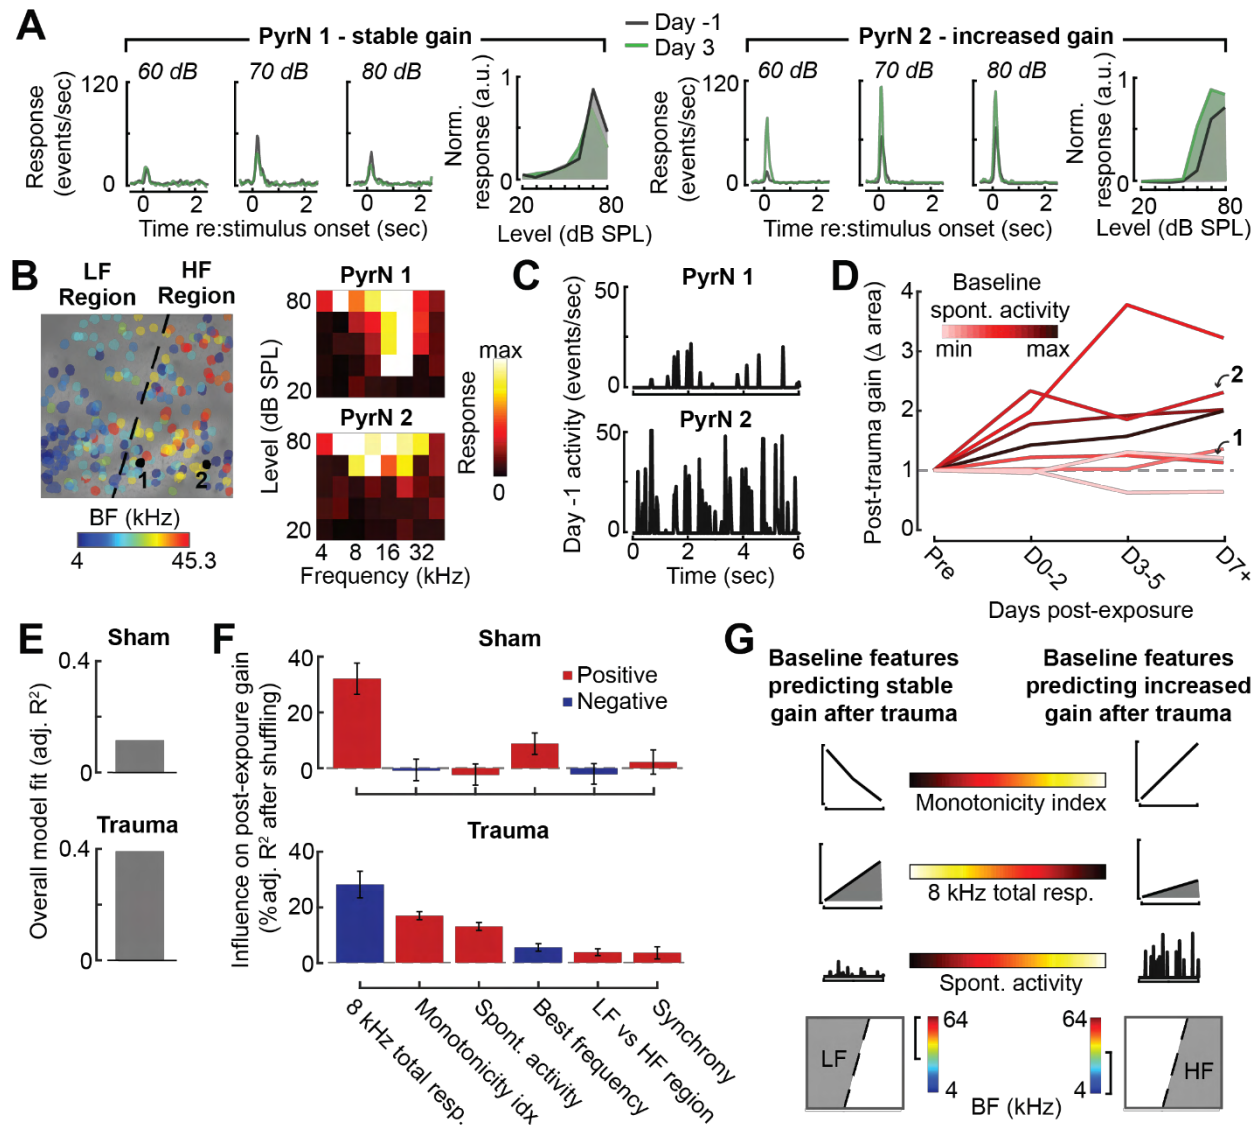

1424  
1425  
1426  
1427  
1428  
1429  
1430  
1431  
1432  
1433  
1434  
1435  
1436  
1437  
1438  
1439  
1440  
1441  
1442  
1443  
1444  
1445

**FIGURE 8. Identifying baseline features in single PyrNs that predict stable versus excess gain changes after acoustic trauma.**

**(A)** Two exemplar tracked neurons illustrating stable (*left*) and excess (*right*) response growth to an 8 kHz tone following acoustic trauma.

**(B)** Both neurons are located in the deafferented map region but had different BFs and frequency tuning properties measured during the baseline imaging session.

**(C)** Spontaneous activity for the same two PyrNs also differed at baseline.

**(D)** For tracked neurons, gain is measured as the fold change in the area under the intensity-response growth function relative to the pre-exposure baseline (see **Figure 8 – figure supplement 1A**). In 8 representative neurons, a higher spontaneous activity rate at baseline was associated with excess central gain after trauma. Arrows denote PyrNs 1 and 2 shown in A-C.

**(E)** A linear model used various pre-exposure properties of chronically tracked neurons to predict their change in gain (see **Methods**). Models were fit separately for PyrNs recorded from trauma ( $n = 510$ ) and sham ( $n = 749$ ) mice.

**(F)** For each model, individual predictor variables were shuffled and the models were re-fit. The resulting decrease in the adjusted r-squared is shown for variables in both models, and bars are color-coded by the sign of the relationship of each predictor variable with the response variable. Errors are bootstrapped. For the full model see **Figure 8 – figure supplement 1B**. Predictor variables in order: area under the baseline 8 kHz intensity-response growth function, monotonicity index for the 8 kHz intensity-response function defined as the response at the maximum intensity divided by the response at the best intensity, mean spontaneous

activity, BF, an indicator variable for whether the cell is in the deafferented or intact region, and the strength of correlated activity between the PyrN and its neighbors.  
**(G)** A graphical summary of the linear model results schematize the baseline factors most strongly associated with stable (*left*) or excess (*right*) gain after trauma.

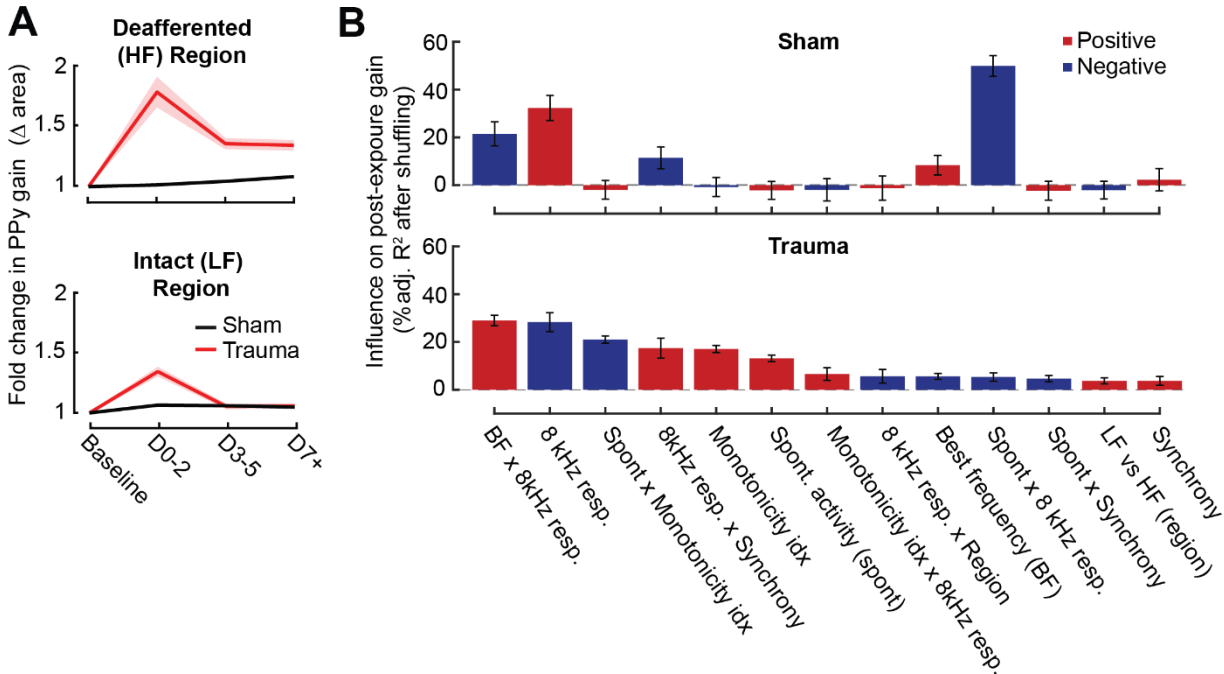

**Figure 8 – figure supplement 1. Extended description of the multi-variate linear model analysis in sham and trauma mice.**

**(A)** For tracked neurons, gain for an 8 kHz tone was measured as the area under the intensity-response function relative to the baseline area. Neurons in the intact region show a temporary increase in gain after trauma, while neurons in the deafferented region show permanent changes in gain. The fold change in area is the response variable for the linear model.

**(B)** For each model, individual predictor variables were shuffled and the models were re-fit. The resulting decrease in the adjusted r-squared is shown for variables in both models, and bars are color-coded by the sign of the relationship of each predictor variable with the response variable. Errors are bootstrapped.



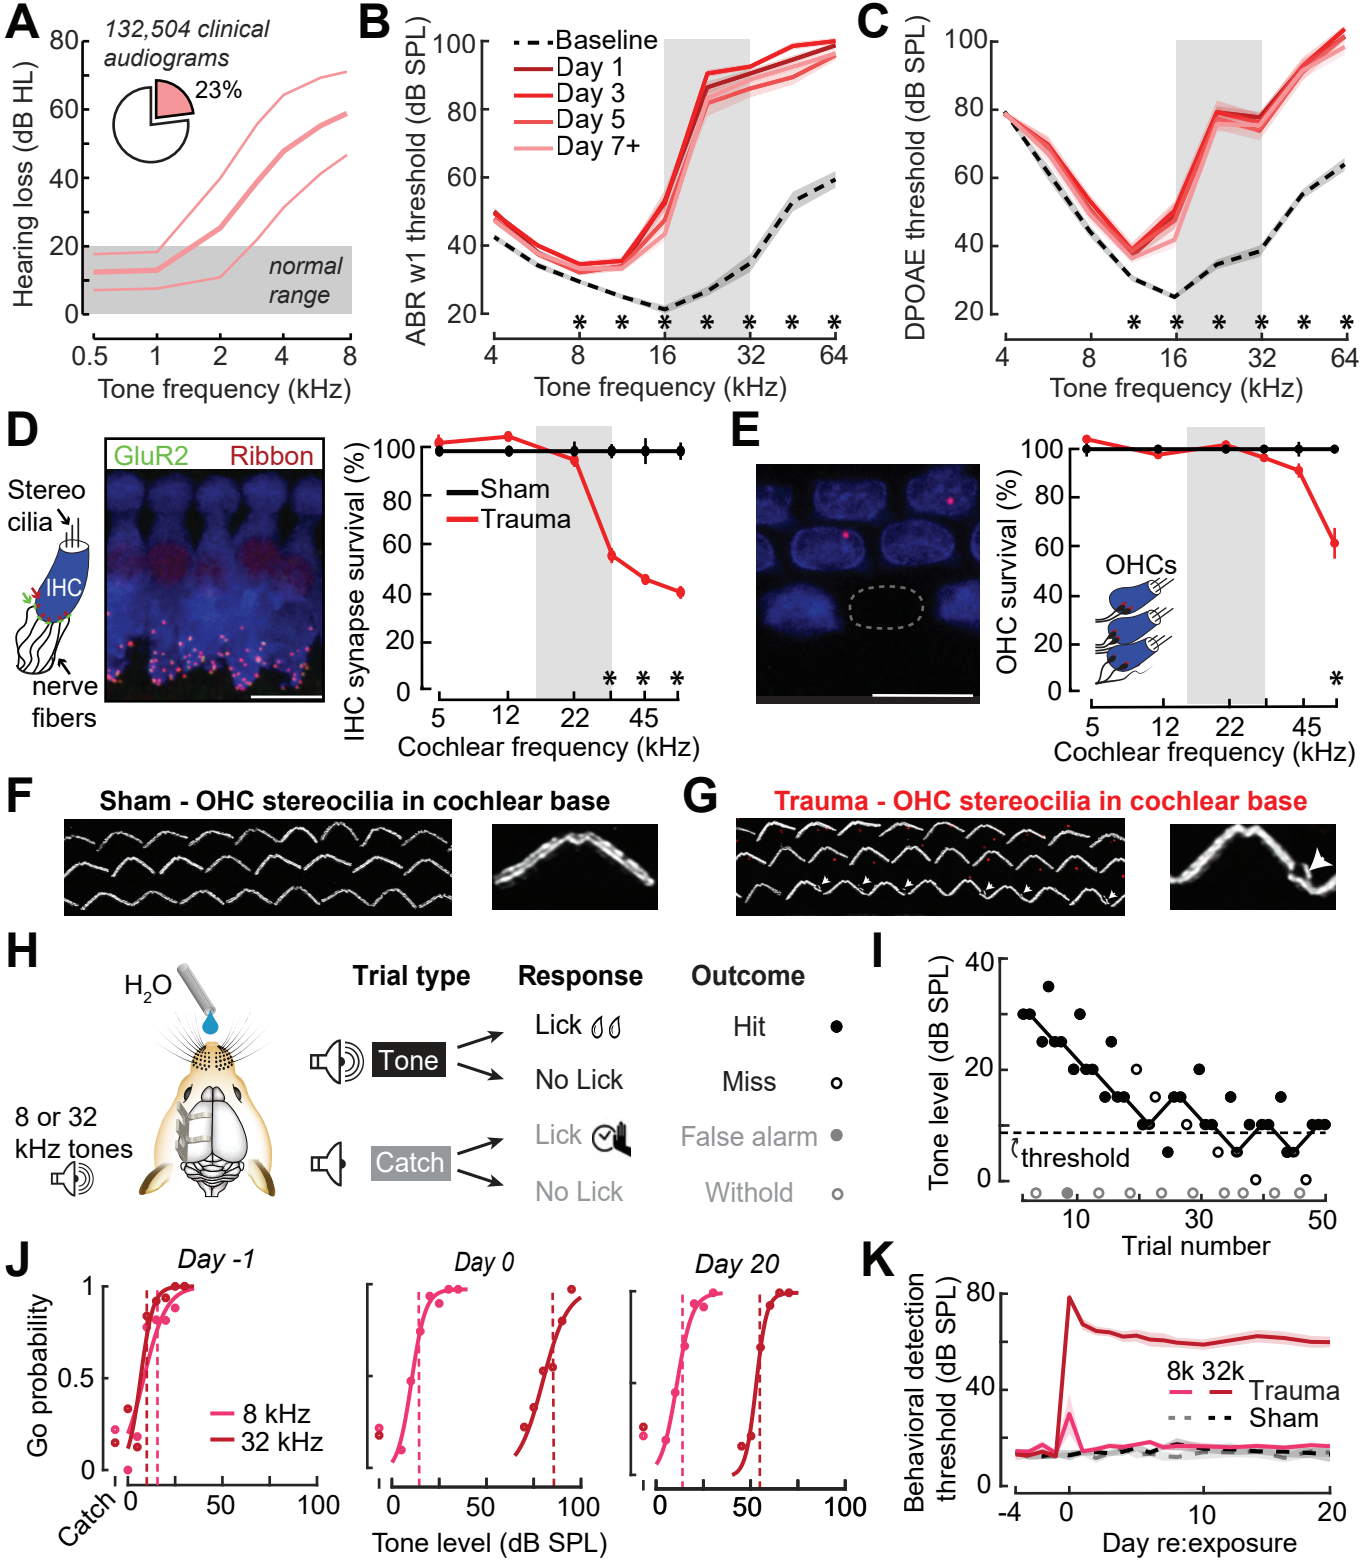

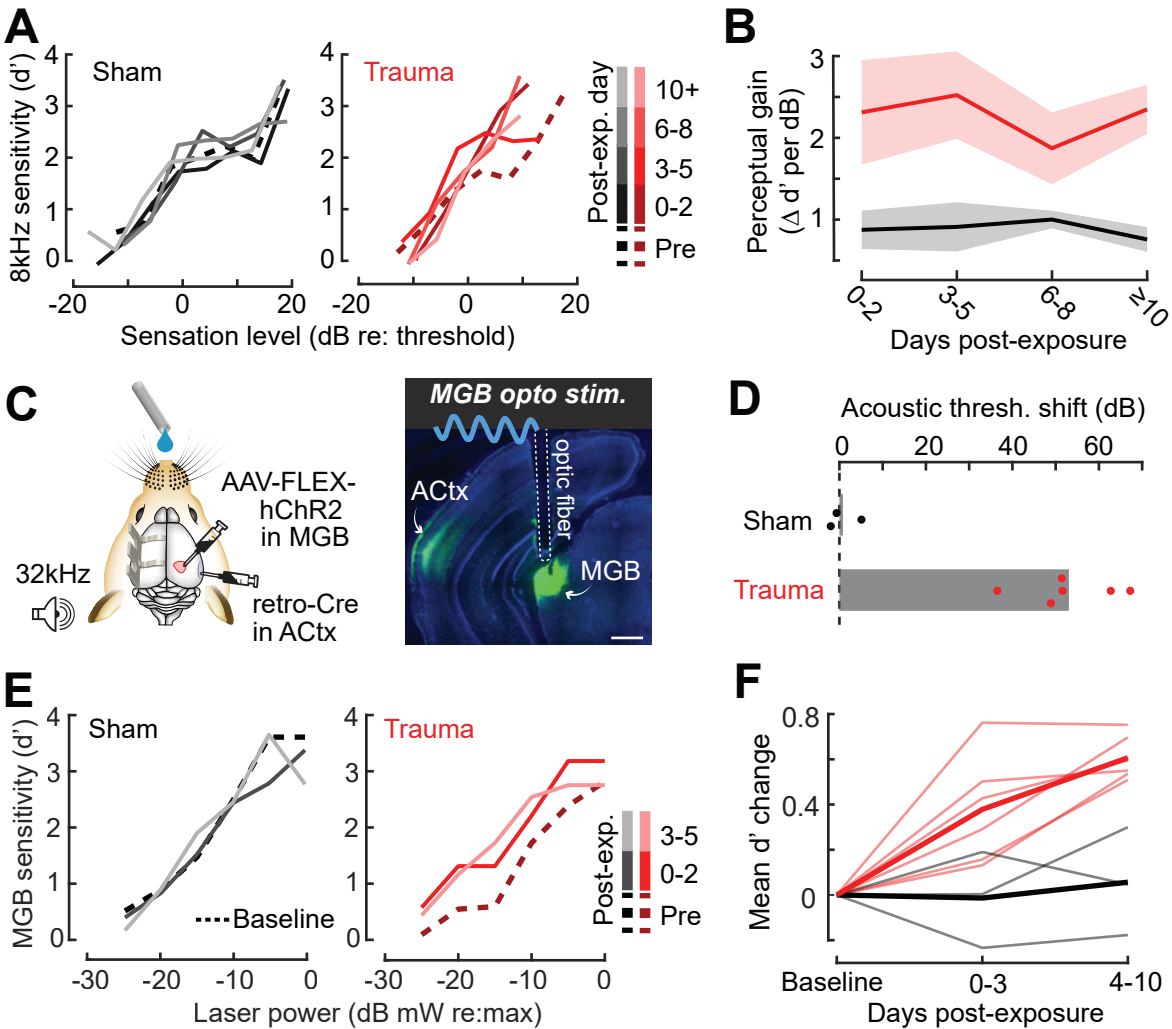

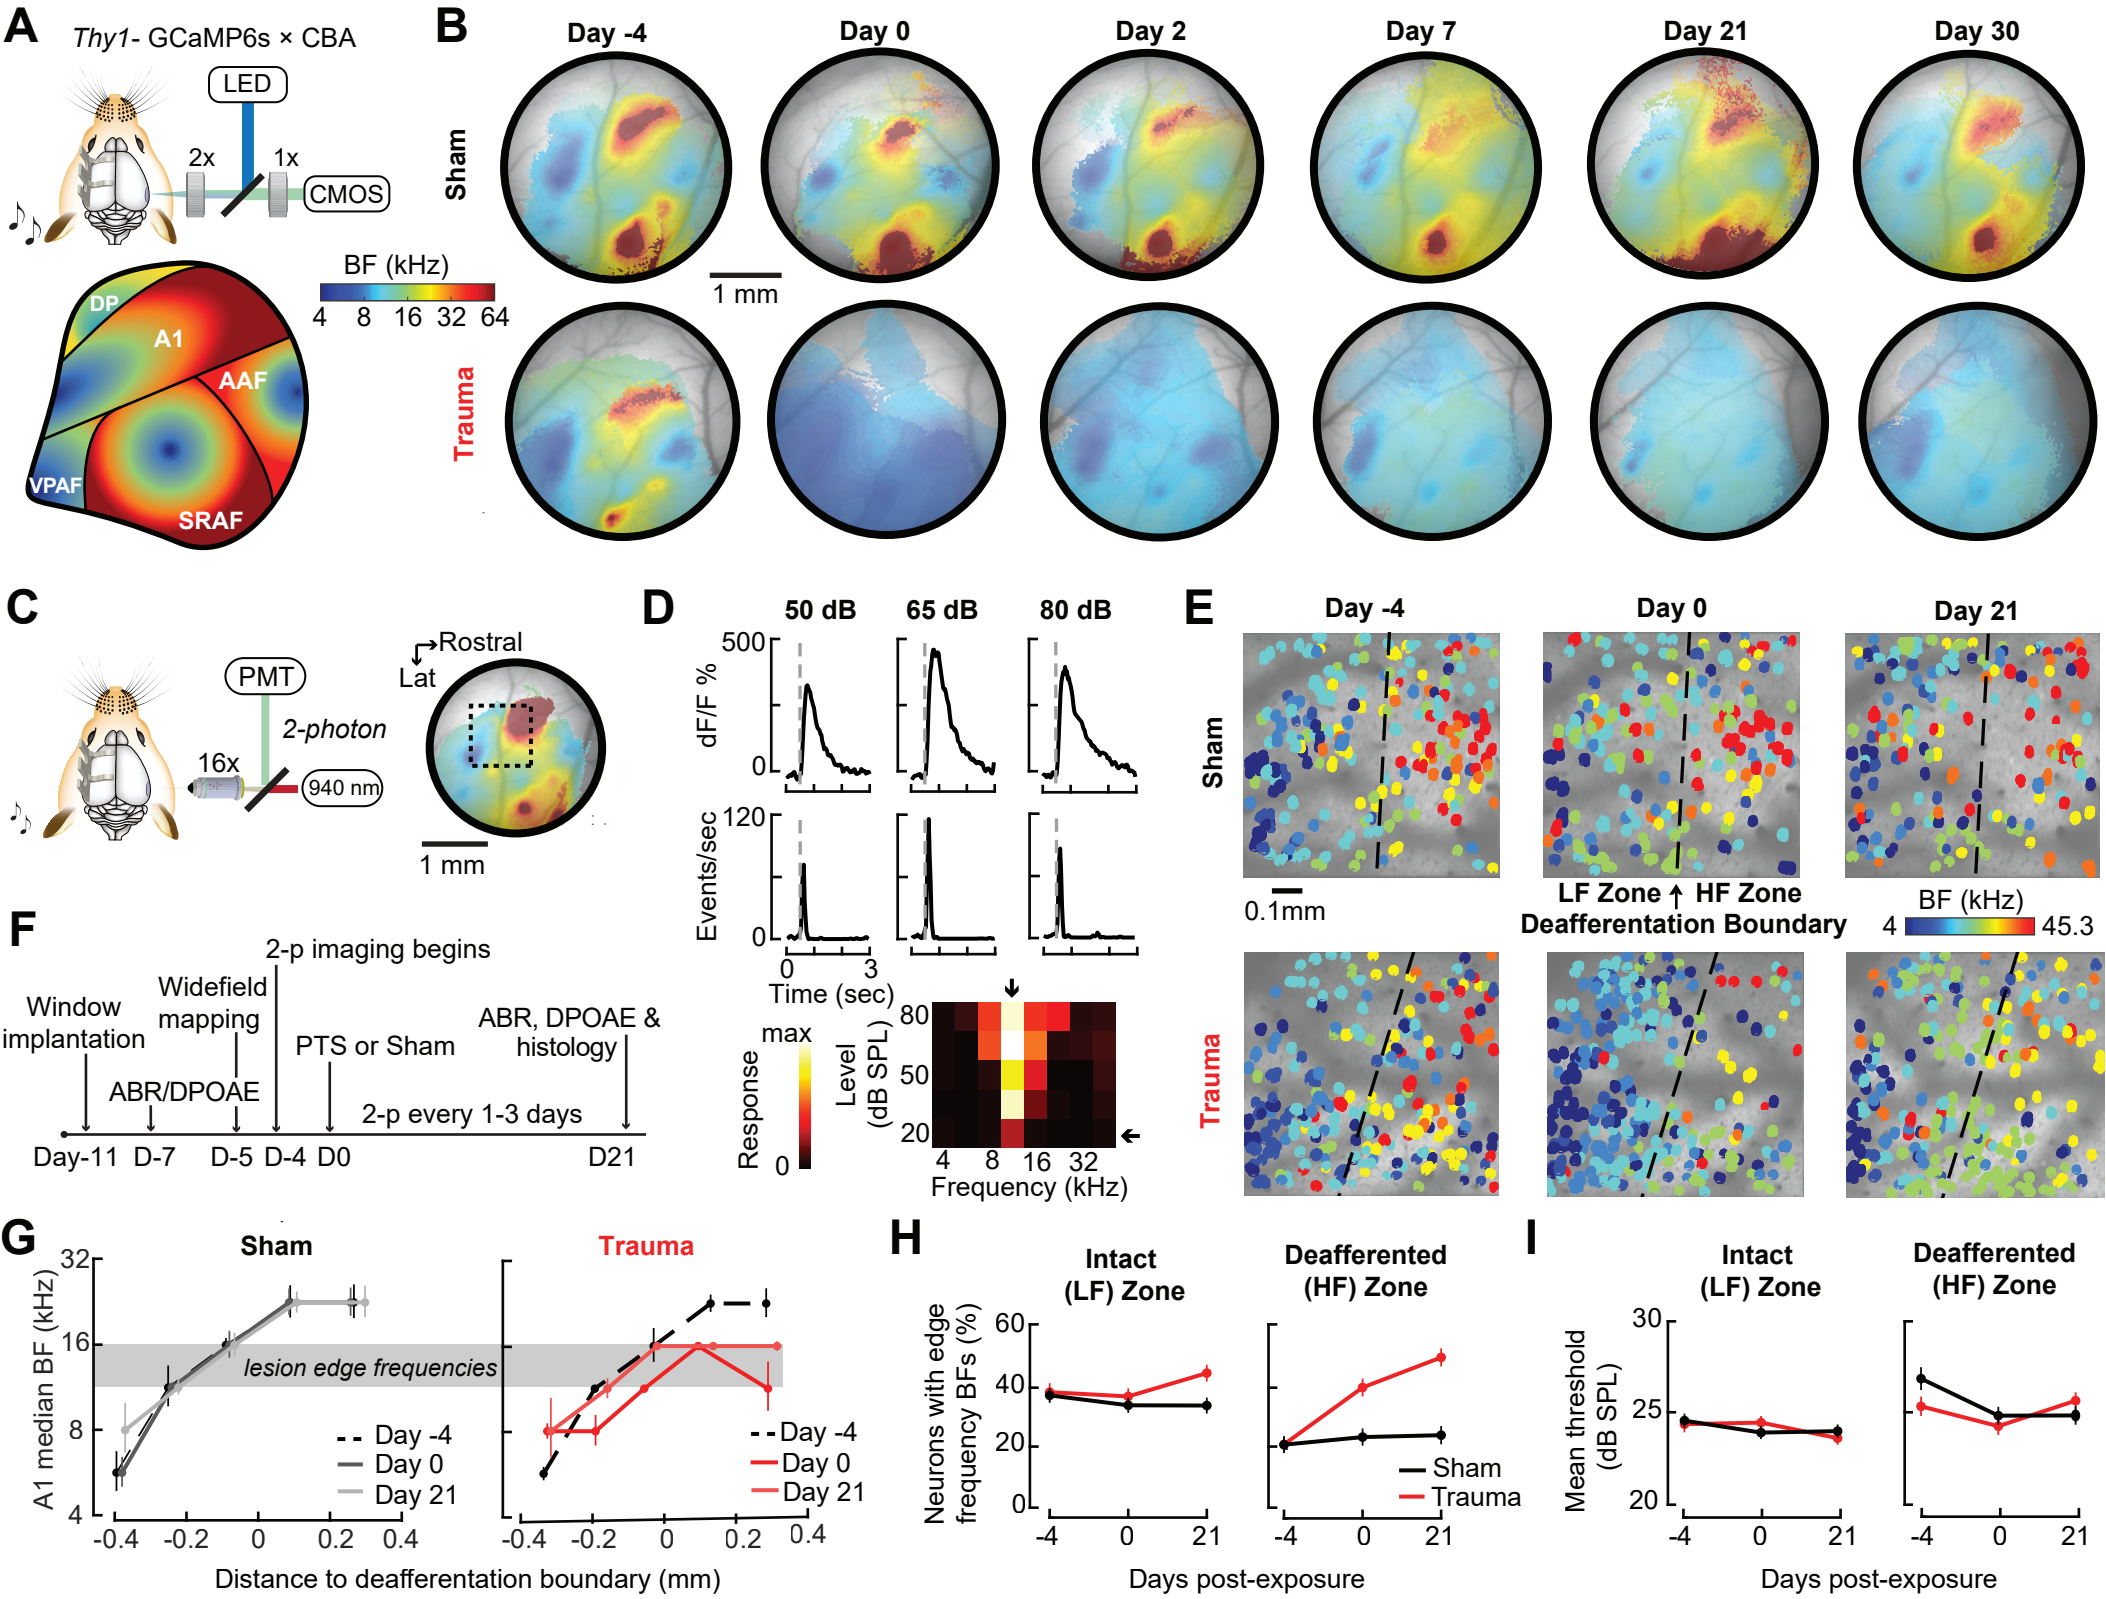

**A**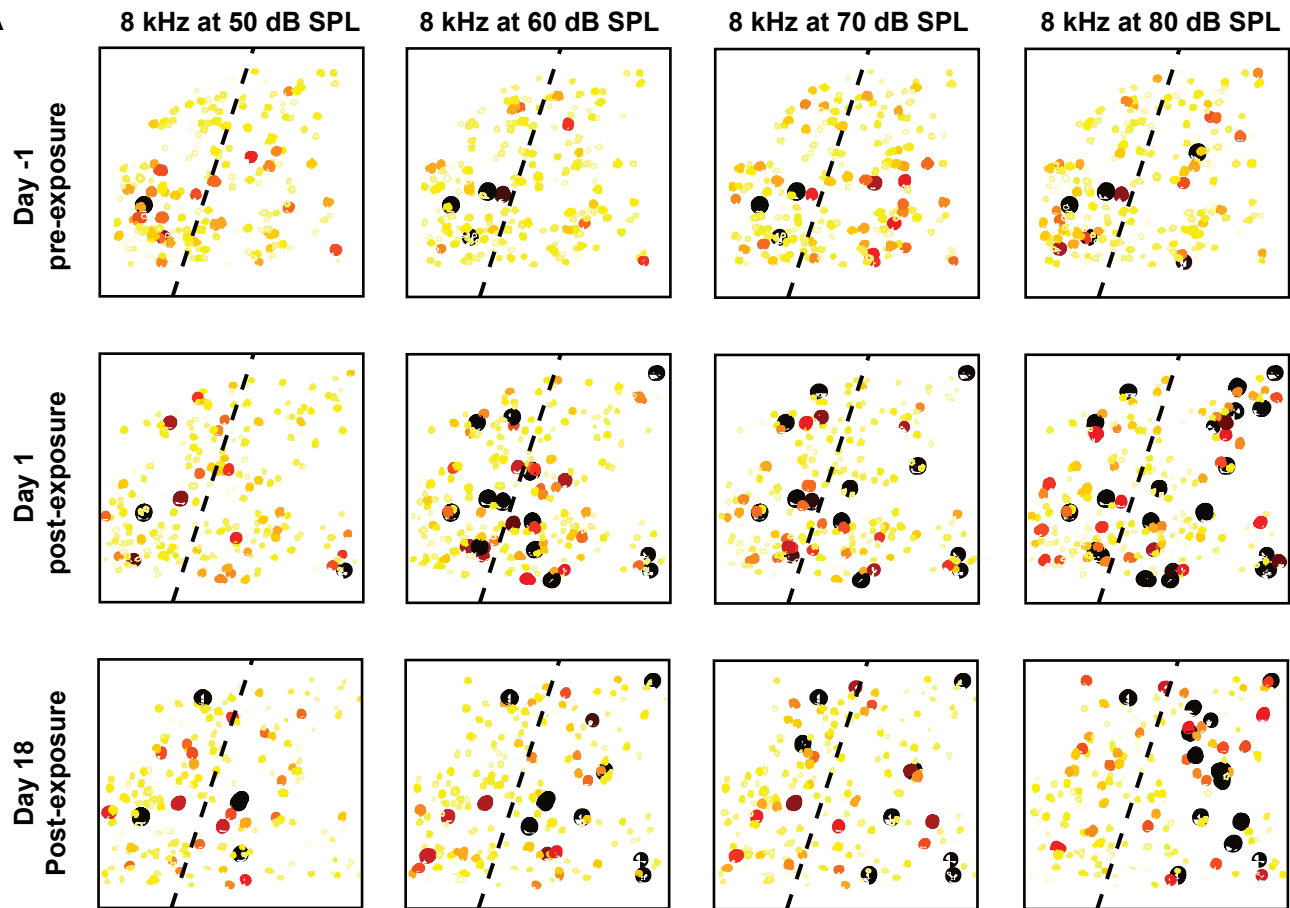**C**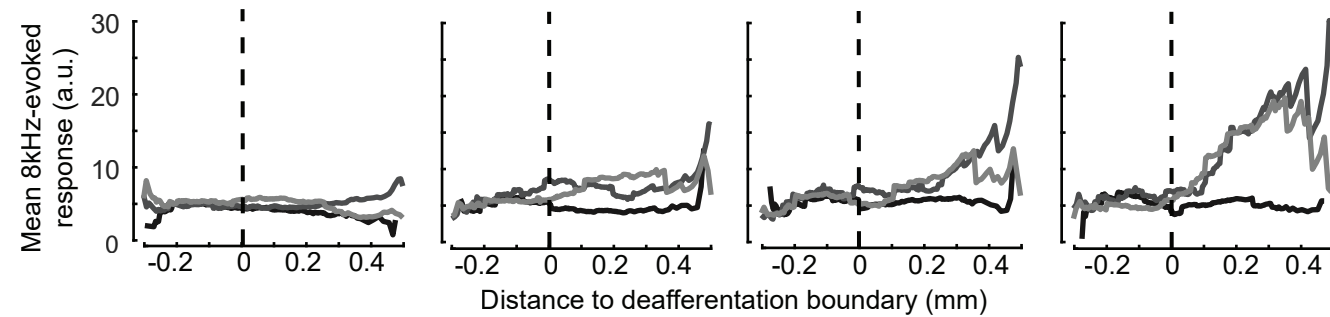**B**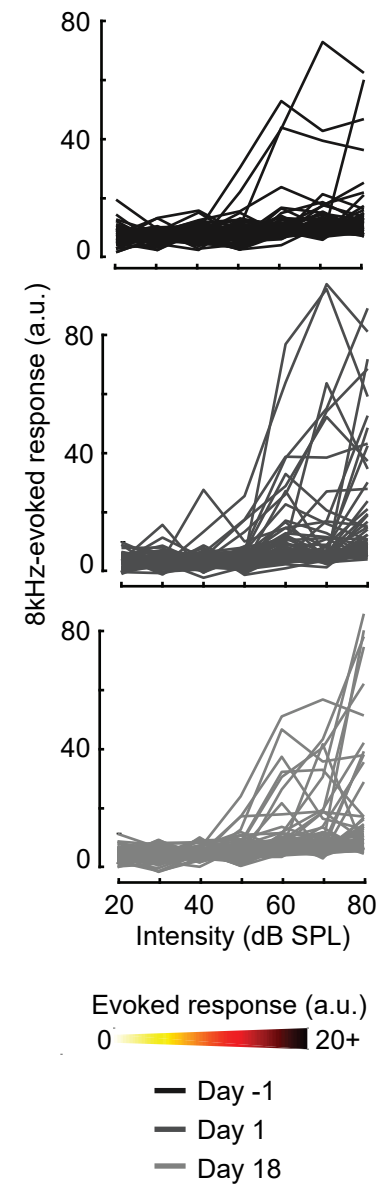

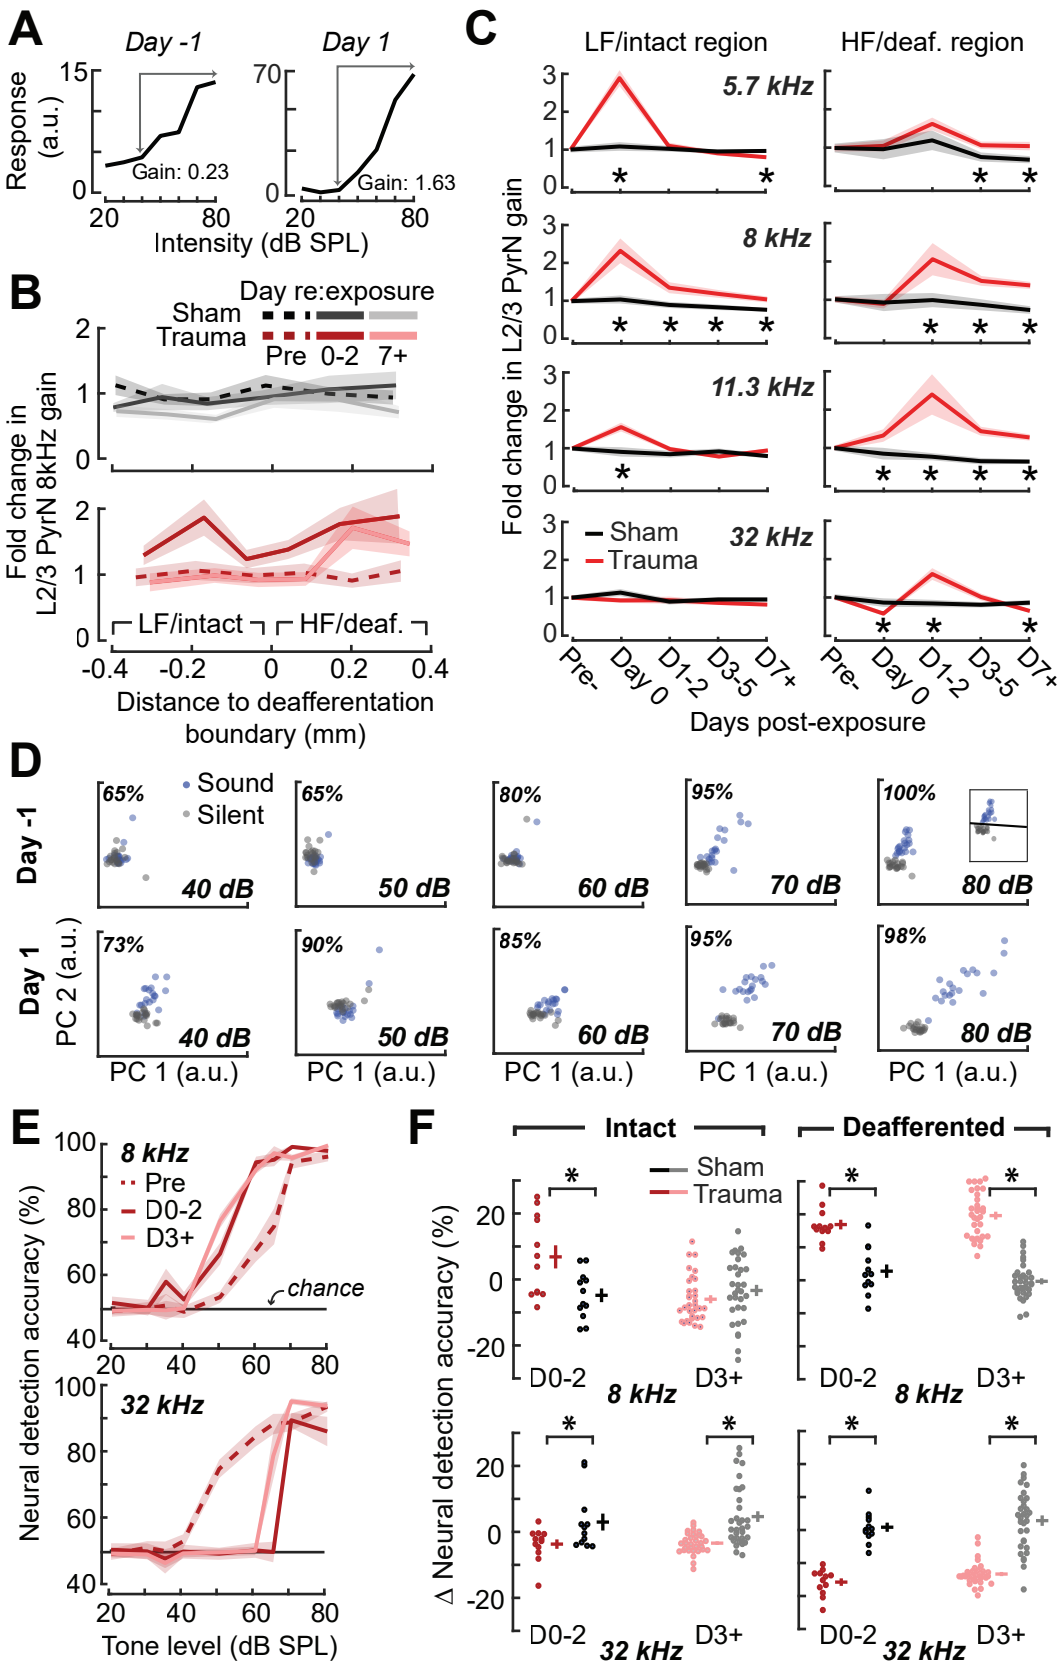



**A**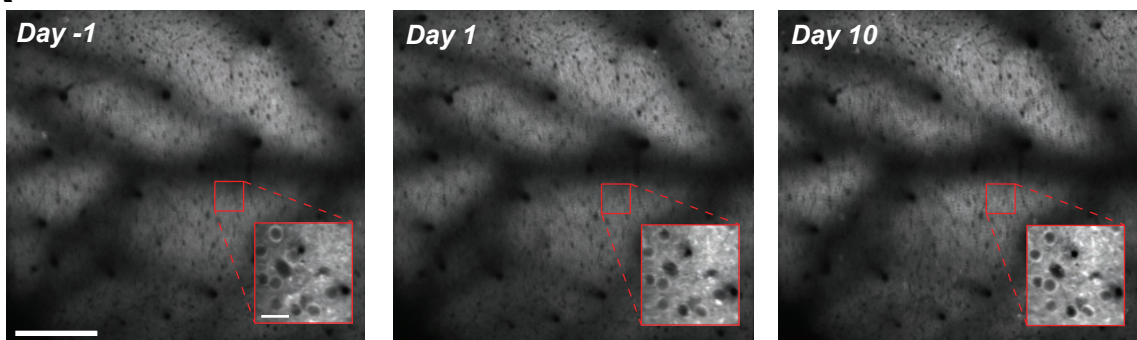**B**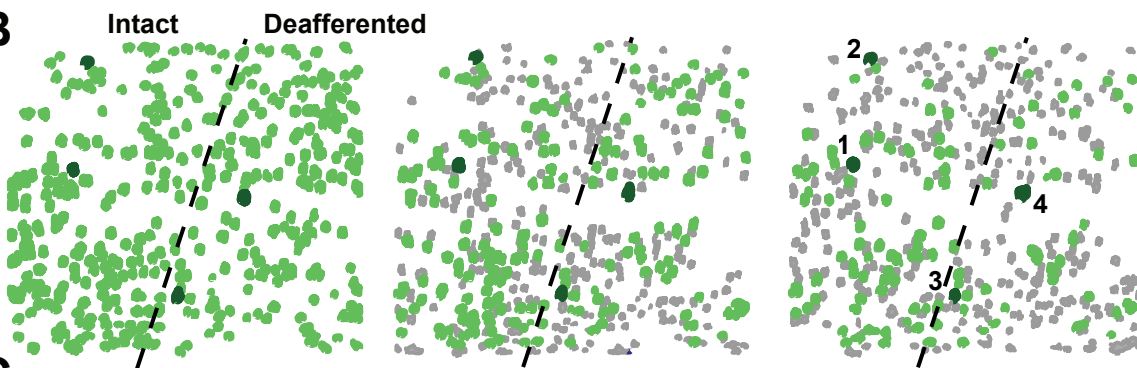**C**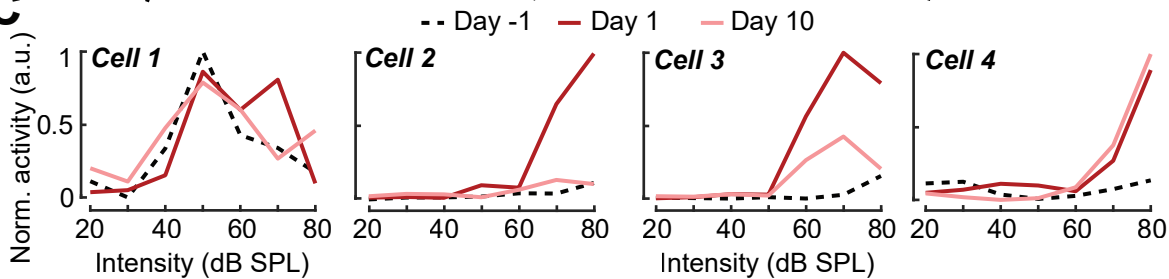**D**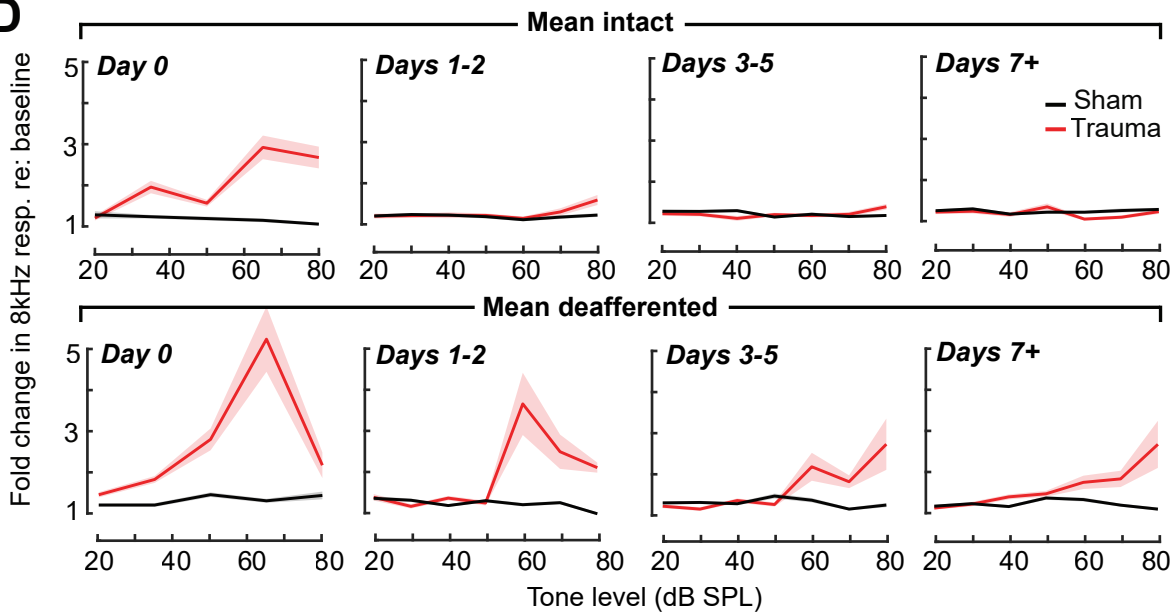

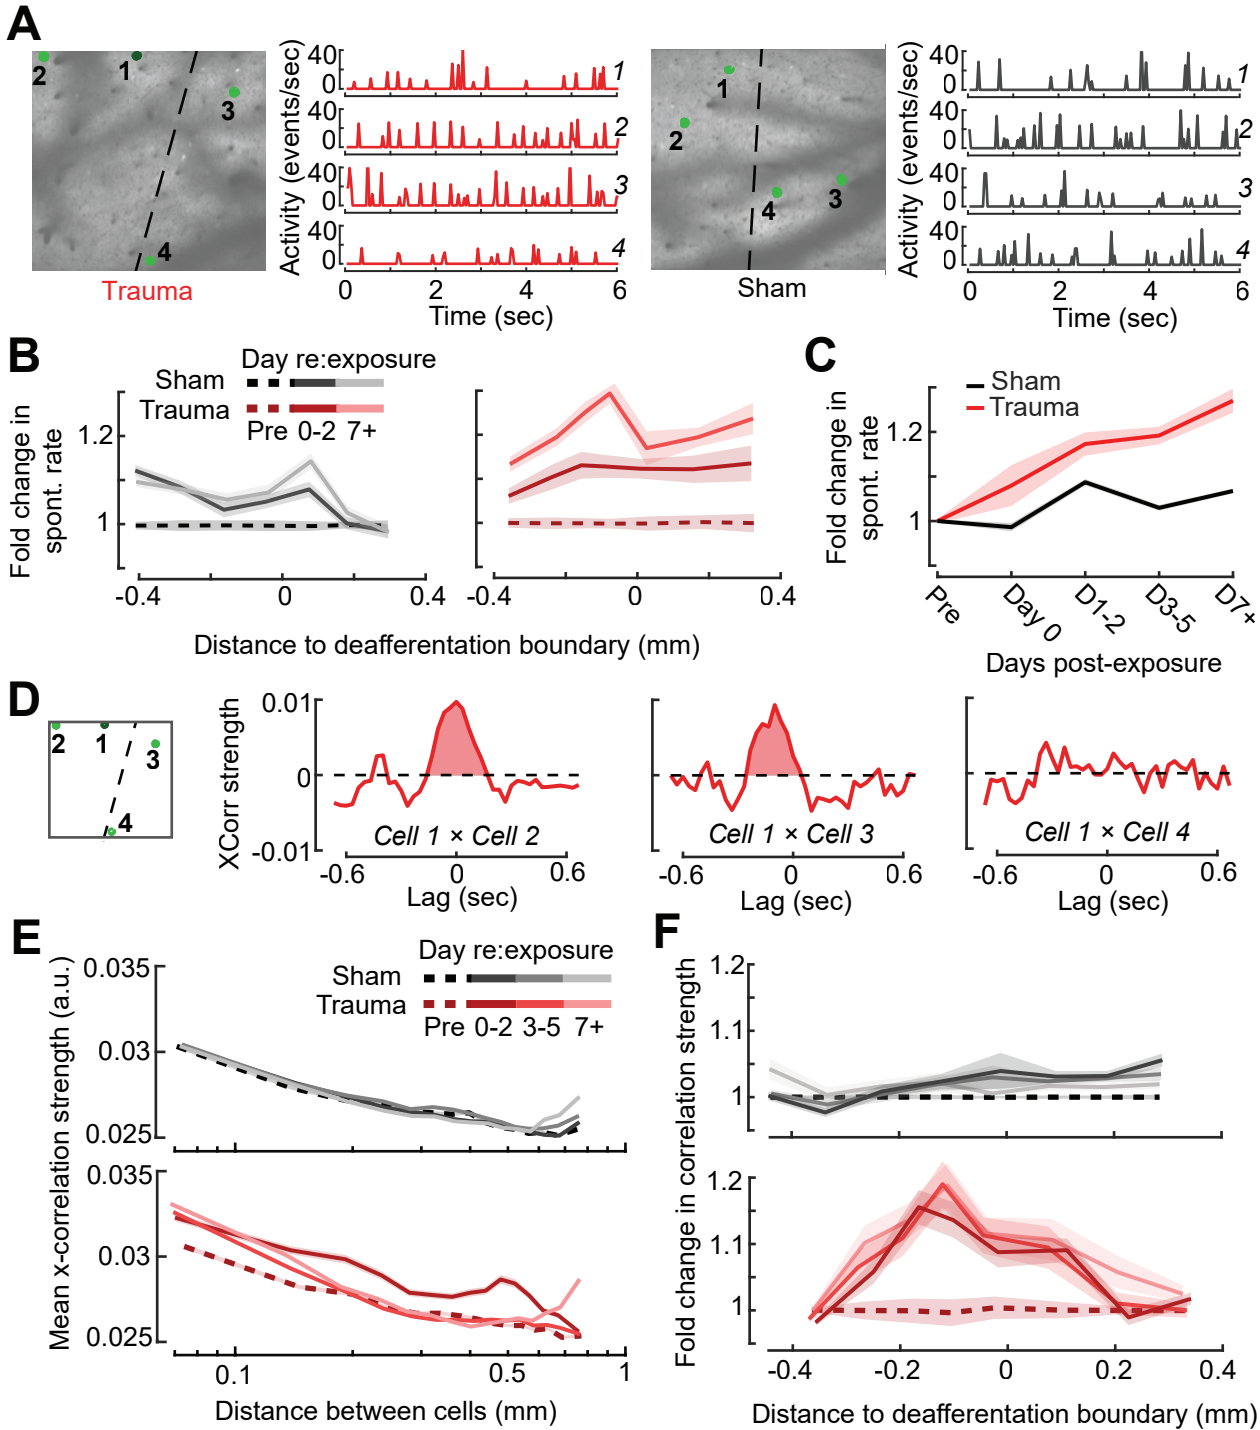

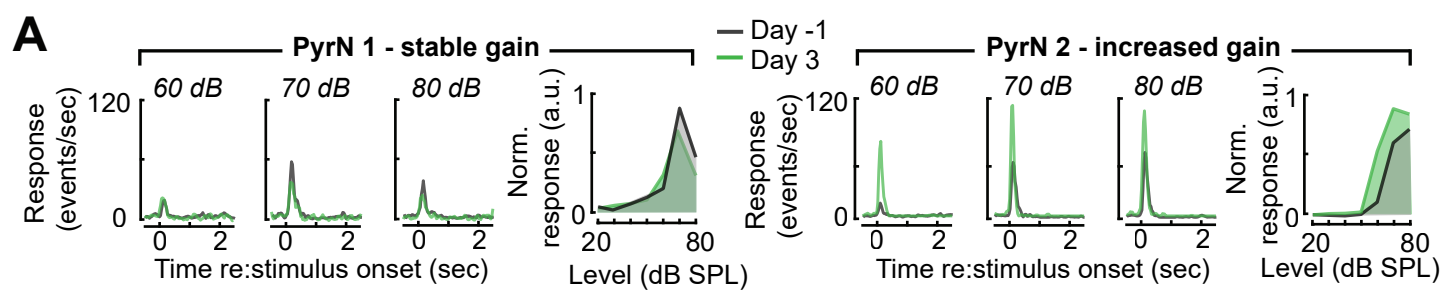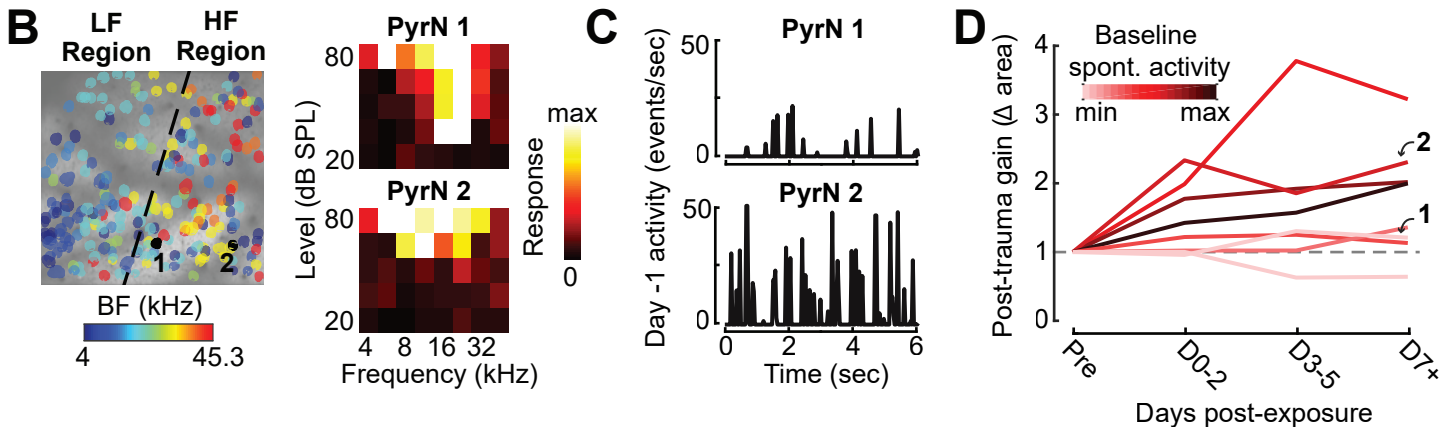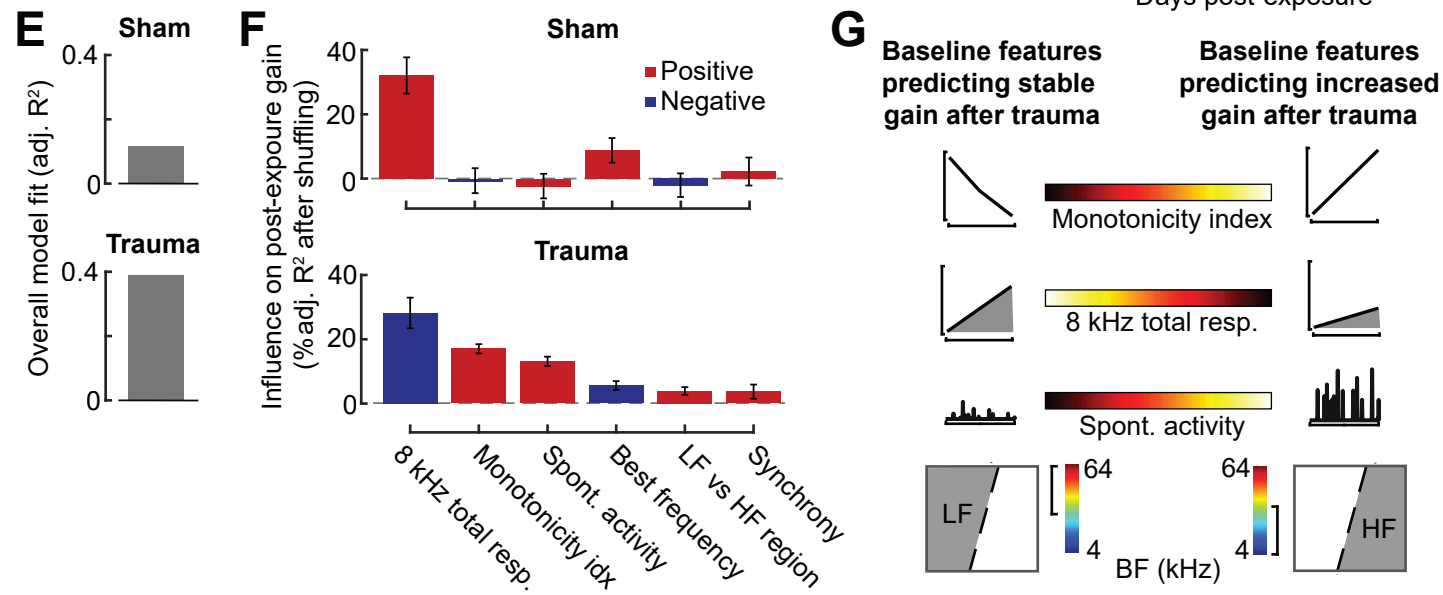

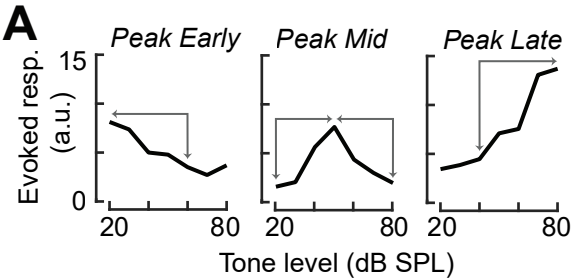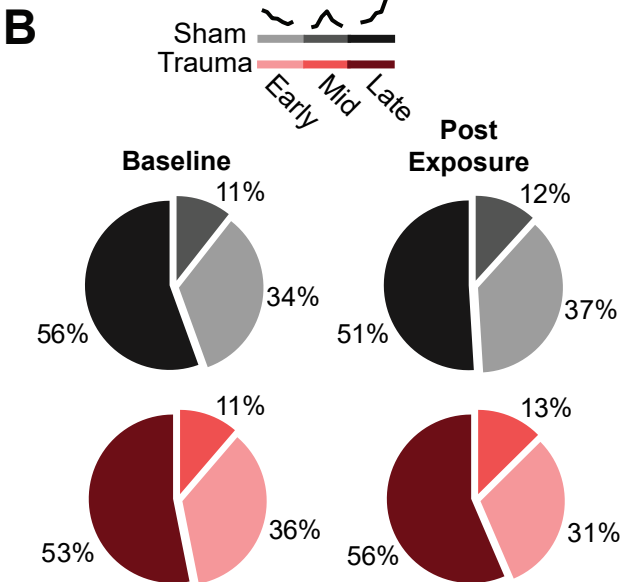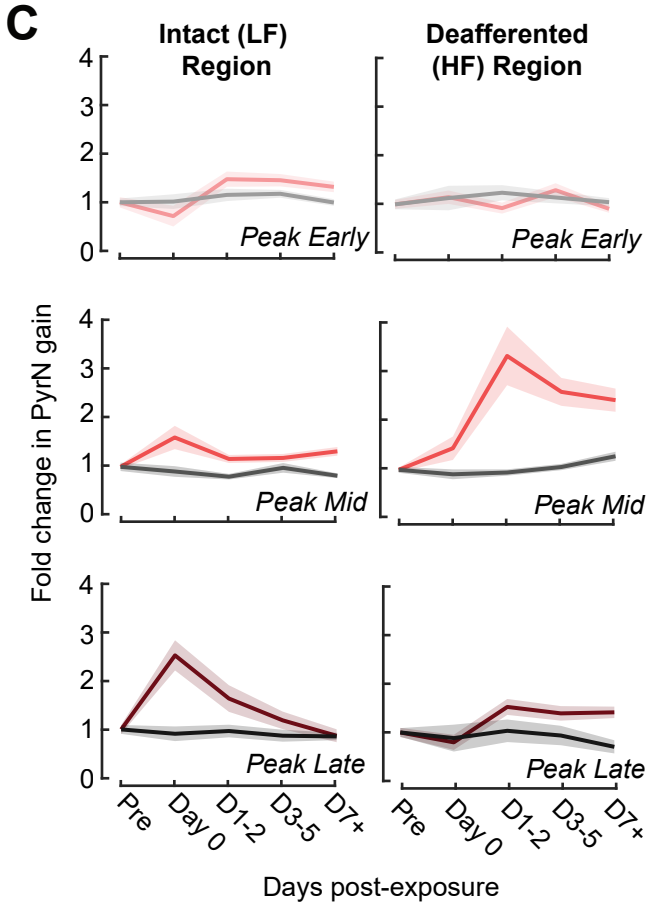

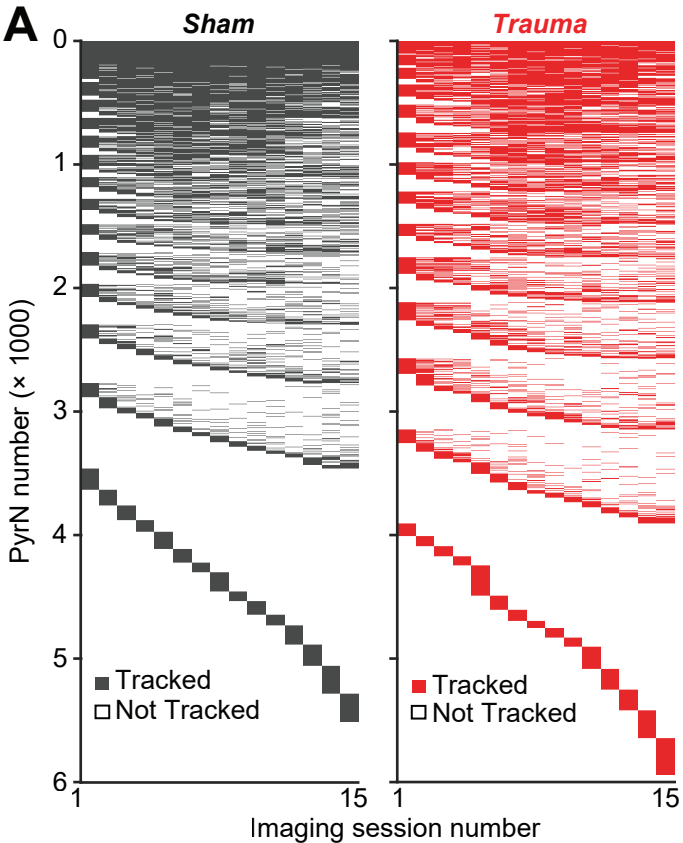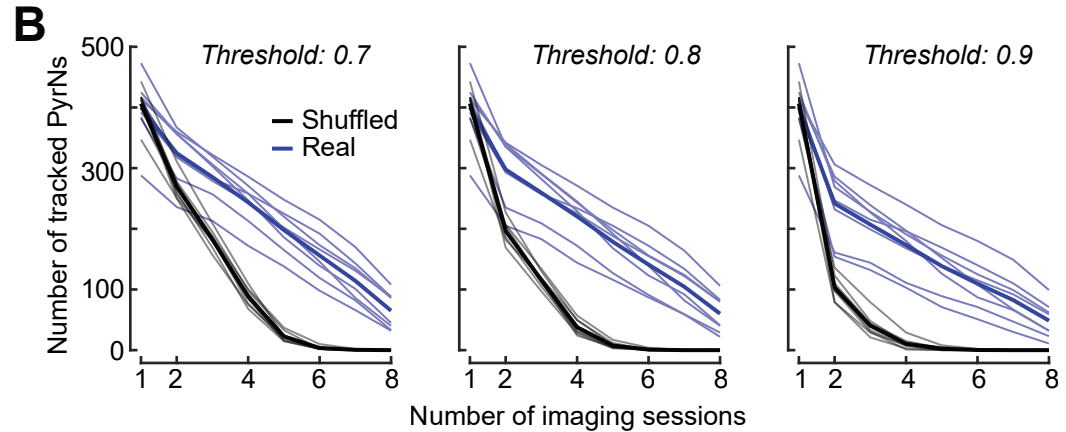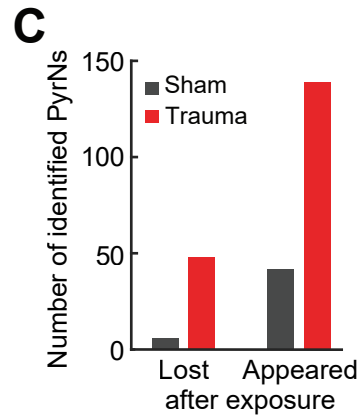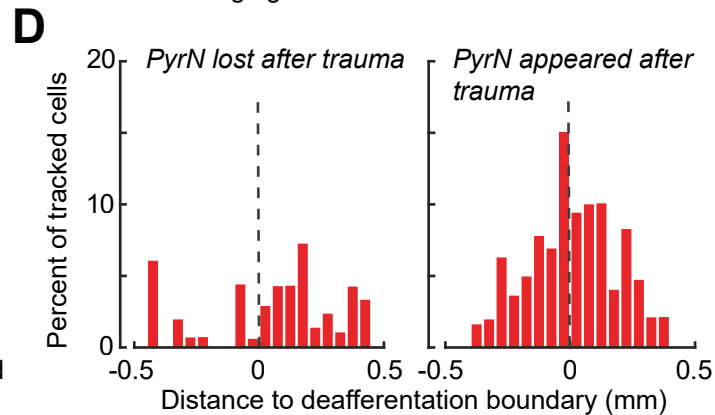



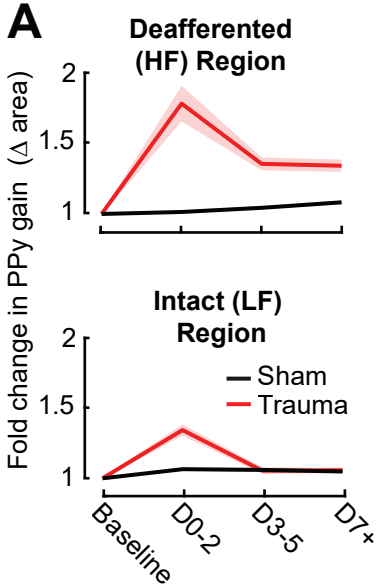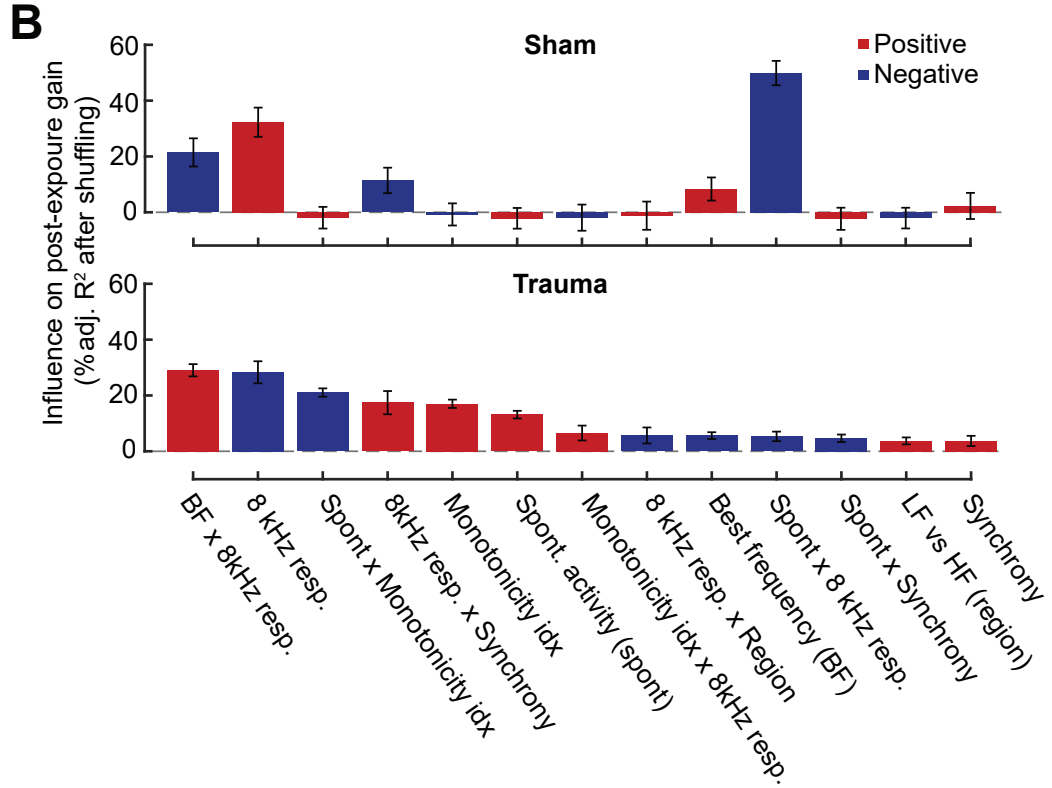

Source: http://biorxiv.org/content/10.1101/2022.05.24.493204v1.full.pdf
